# Supplementary material for: Genome comparisons provide insights into the role of secondary metabolites in the pathogenic phase of the Photorhabdus life cycle
Source: BMC Genomics. 2016 Aug 3;17:537. doi: 10.1186/s12864-016-2862-4 (PMC4971723; doi:10.1186/s12864-016-2862-4)
Supplement: Additional file 2: — All protein ortholog families. (XLSX 394 kb) [file 12864_2016_2862_MOESM2_ESM.xlsx]

## Sheet: Supplementary Table 1 - protein
E_coli_K12	P_temperata_M1021	P_luminescens_PB45.5	P_temperata_NC19	P_luminescens_TT01	P_asymbiotica_DSM43949	P_asymbiotica_PB68.1	P_temperata_thracensis_DSM15199
b2837,b2151	B738_26477	Phpb_00745	PTE_02216,PTE_00827	plu3733	PAU_03031	Ppb6_03409	VY86_00905,VY86_00185
b3411,b2305,b2244	B738_24687,B738_12322,B738_17282	Phpb_02773,Phpb_02796	PTE_00788,PTE_04128,PTE_00480,PTE_00830,PTE_03271	plu1669,plu1643	PAU_00292,PAU_02404,PAU_02809	Ppb6_00017	VY86_11495,VY86_11170
b1744	B738_20278	Phpb_01482	PTE_00872	plu3106	PAU_01501	Ppb6_01713	VY86_00105
b1745	B738_20283	Phpb_01481	PTE_00871	plu3107	PAU_01500	Ppb6_01714	VY86_00110
b1746	B738_20288	Phpb_01480	PTE_00870	plu3108	PAU_01499	Ppb6_01715	VY86_00115
b1748	B738_20303	Phpb_01478	PTE_00868	plu3110	PAU_01497	Ppb6_01717	VY86_00125
b1512	B738_14167	Phpb_02208	PTE_00782	plu3142	PAU_01470	Ppb6_03472	VY86_00285
b1517	B738_14172	Phpb_02203	PTE_00777	plu3147	PAU_01469	Ppb6_03474	VY86_00295
b1518	B738_14177	Phpb_02202	PTE_00776	plu3148	PAU_01468	Ppb6_03475	VY86_00300
b2299	B738_14192	Phpb_02192	PTE_00766	plu3158	PAU_01462	Ppb6_03476	VY86_00335
b2302	B738_14227	Phpb_02188	PTE_00762	plu3164	PAU_01460	Ppb6_03478	VY86_00355
b2304	B738_14232	Phpb_02187	PTE_00761	plu3165	PAU_01459	Ppb6_03479	VY86_00360
b2312	B738_14242	Phpb_02185	PTE_00759	plu3167	PAU_01457	Ppb6_03481	VY86_00370
b2313	B738_14247	Phpb_02184	PTE_00758	plu3168	PAU_01456	Ppb6_03482	VY86_00375
b2314	B738_14252	Phpb_02183	PTE_00757	plu3169	PAU_01455	Ppb6_03483	VY86_00380
b2315	B738_14257	Phpb_02182	PTE_00756	plu3170	PAU_01454	Ppb6_03484	VY86_00385
b2316	B738_14262	Phpb_02181	PTE_00755	plu3171	PAU_01453	Ppb6_03485	VY86_00390
b2318	B738_14272	Phpb_02179	PTE_00753	plu3173	PAU_01451	Ppb6_03487	VY86_00400
b2320	B738_14292	Phpb_02177	PTE_00751	plu3175	PAU_01449	Ppb6_03489	VY86_00410
b3026	B738_14307	Phpb_02174	PTE_00748	plu3178	PAU_01446	Ppb6_03493	VY86_00425
b3025,b4113	B738_14312	Phpb_02173	PTE_00747	plu3179	PAU_01445	Ppb6_03494	VY86_00430
b2323	B738_03335	Phpb_02168	PTE_00741	plu3184	PAU_01438	Ppb6_03502	VY86_00460
b2325	B738_03355	Phpb_02164	PTE_00737	plu3186	PAU_01430	Ppb6_03508	VY86_00480
b2326	B738_03360	Phpb_02163	PTE_00736	plu3187	PAU_01429	Ppb6_03509	VY86_00485
b2327	B738_03365	Phpb_02162	PTE_00735	plu3188	PAU_01428	Ppb6_03510	VY86_00490
b2329	B738_03370	Phpb_02161	PTE_00734	plu3189	PAU_01427	Ppb6_03511	VY86_00495
b2330	B738_03375	Phpb_02160	PTE_00733	plu3190	PAU_01426	Ppb6_03512	VY86_00500
b0730,b3375	B738_03405	Phpb_02154	PTE_00729	plu3195	PAU_01422	Ppb6_03516	VY86_00520
b2340	B738_03425	Phpb_02150	PTE_00725	plu3199	PAU_01418	Ppb6_03520	VY86_00540
b2344	B738_07571	Phpb_02147	PTE_00722	plu3202	PAU_01414	Ppb6_03524	VY86_00555
b2346	B738_07576	Phpb_02146	PTE_00721	plu3203	PAU_01413	Ppb6_03525	VY86_00560
b2388	B738_07581	Phpb_02454	PTE_00719	plu1405	PAU_01412	Ppb6_03526	VY86_00570
b2400	B738_07586	Phpb_02464	PTE_00713	plu1401	PAU_01411	Ppb6_03532	VY86_00600
b2393	B738_07601	Phpb_02468	PTE_00709	plu1399	PAU_01409	Ppb6_03536	VY86_00625
b2412	B738_07616	Phpb_02470	PTE_00707	plu1397	PAU_01407	Ppb6_03538	VY86_00635
b2413	B738_07621	Phpb_02471	PTE_00706	plu1396	PAU_01406	Ppb6_03539	VY86_00640
b2414	B738_07626	Phpb_02472	PTE_00705	plu1395	PAU_01405	Ppb6_03540	VY86_00645
b2415	B738_07631	Phpb_02473	PTE_00704	plu1394	PAU_01404	Ppb6_03541	VY86_00650
b2417	B738_07646	Phpb_02475	PTE_00702	plu1392	PAU_01402	Ppb6_03543	VY86_00660
b2421	B738_07651	Phpb_02476	PTE_00701	plu1391	PAU_01401	Ppb6_03544	VY86_00665
b2423	B738_07666	Phpb_02478	PTE_00699	plu1389	PAU_01399	Ppb6_03546	VY86_00675
b2424	B738_07671	Phpb_02479	PTE_00698	plu1388	PAU_01398	Ppb6_03547	VY86_00680
b2432	B738_07686	Phpb_02481	PTE_00696	plu1386	PAU_01396	Ppb6_03549	VY86_00690
b3024	B738_07691	Phpb_02482	PTE_00695	plu1385	PAU_01395	Ppb6_03550	VY86_00695
b2436	B738_07701	Phpb_02484	PTE_00693	plu1383	PAU_01393	Ppb6_03552	VY86_00705
b2511	B738_07716	Phpb_02487	PTE_00690	plu1380	PAU_01390	Ppb6_03555	VY86_00720
b2512	B738_07721	Phpb_02488	PTE_00689	plu1379	PAU_01389	Ppb6_03556	VY86_00725
b2513	B738_07726	Phpb_02489	PTE_00688	plu1378	PAU_01388	Ppb6_03557	VY86_00730
b2514	B738_07731	Phpb_02490	PTE_00687	plu1377	PAU_01387	Ppb6_03558	VY86_00735
b2515	B738_07736	Phpb_02491	PTE_00686	plu1376	PAU_01386	Ppb6_03559	VY86_00740
b2516	B738_07741	Phpb_02492	PTE_00685	plu1375	PAU_01385	Ppb6_03560	VY86_00745
b2517	B738_07751	Phpb_02494	PTE_00683	plu1373	PAU_01383	Ppb6_03562	VY86_00755
b2518	B738_07756	Phpb_02495	PTE_00682	plu1372	PAU_01382	Ppb6_03563	VY86_00760
b2523	B738_07831	Phpb_02112	PTE_00675	plu3276	PAU_01369	Ppb6_03568	VY86_00800
b2524	B738_07836	Phpb_02111	PTE_00674	plu3277	PAU_01368	Ppb6_03569	VY86_00805
b2525	B738_07841	Phpb_02110	PTE_00673	plu3278	PAU_01367	Ppb6_03570	VY86_00810
b2527	B738_07856	Phpb_02108	PTE_00671	plu3280	PAU_01365	Ppb6_03572	VY86_00820
b2528	B738_07861	Phpb_02107	PTE_00670	plu3281	PAU_01364	Ppb6_03573	VY86_00825
b2529	B738_07866	Phpb_02106	PTE_00669	plu3282	PAU_01363	Ppb6_03574	VY86_00830
b2530	B738_07871	Phpb_02105	PTE_00668	plu3283	PAU_01362	Ppb6_03575	VY86_00835
b2531	B738_07876	Phpb_02104	PTE_00667	plu3284	PAU_01361	Ppb6_03576	VY86_00840
b2532	B738_07881	Phpb_02103	PTE_00666	plu3285	PAU_01360	Ppb6_03577	VY86_00845
b2533	B738_07886	Phpb_02102	PTE_00665	plu3286	PAU_01359	Ppb6_03578	VY86_00850
b4240	B738_07906	Phpb_02100	PTE_00663	plu3288	PAU_01357	Ppb6_03580	VY86_00860
b4241	B738_07911	Phpb_02099	PTE_00662	plu3289	PAU_01356	Ppb6_03581	VY86_00865
b2551	B738_07931	Phpb_02097	PTE_00659	plu3291	PAU_01354	Ppb6_03583	VY86_00875
b2552	B738_07936	Phpb_02096	PTE_00658	plu3292	PAU_01352	Ppb6_03584	VY86_00880
b0684	B738_25110	Phpb_03082	PTE_04474	plu1328	PAU_03082	Ppb6_01143	VY86_01130
b0683	B738_25115	Phpb_03081	PTE_04473	plu1327	PAU_03083	Ppb6_01144	VY86_01135
b0680	B738_01924	Phpb_03074	PTE_04460	plu1319	PAU_03085	Ppb6_01146	VY86_01175
b0679	B738_01929	Phpb_03073	PTE_04459	plu1318	PAU_03088	Ppb6_01149	VY86_01180
b0678	B738_01939	Phpb_03072	PTE_04458	plu1317	PAU_03089	Ppb6_01150	VY86_01185
b0676	B738_01954	Phpb_03070	PTE_04456	plu1315	PAU_03091	Ppb6_01152	VY86_01195
b0662	B738_01964	Phpb_02992	PTE_04449	plu1313	PAU_03144	Ppb6_01248	VY86_01230
b0661	B738_01969	Phpb_02991	PTE_04448	plu1312	PAU_03145	Ppb6_01249	VY86_01235
b0658	B738_01989	Phpb_02988	PTE_04445	plu1309	PAU_03148	Ppb6_01252	VY86_01250
b0657	B738_01994	Phpb_02987	PTE_04444	plu1308	PAU_03149	Ppb6_01253	VY86_01255
b0654	B738_02019	Phpb_02984	PTE_04441	plu1306	PAU_03153	Ppb6_01256	VY86_01270
b0653	B738_02024	Phpb_02983	PTE_04440	plu1305	PAU_03154	Ppb6_01257	VY86_01275
b0652	B738_02029	Phpb_02982	PTE_04439	plu1304	PAU_03155	Ppb6_01258	VY86_01280
b0640	B738_02054	Phpb_02979	PTE_04436	plu1301	PAU_03158	Ppb6_01261	VY86_01295
b0639	B738_02059	Phpb_02978	PTE_04435	plu1300	PAU_03159	Ppb6_01262	VY86_01300
b0637	B738_02064	Phpb_02977	PTE_04434	plu1299	PAU_03160	Ppb6_01263	VY86_01305
b0636	B738_02069	Phpb_02976	PTE_04433	plu1298	PAU_03161	Ppb6_01264	VY86_01310
b0635	B738_02074	Phpb_02975	PTE_04432	plu1297	PAU_03162	Ppb6_01265	VY86_01315
b0634	B738_02079	Phpb_02974	PTE_04431	plu1296	PAU_03163	Ppb6_01266	VY86_01320
b0633	B738_02084	Phpb_02973	PTE_04430	plu1295	PAU_03164	Ppb6_01267	VY86_01325
b0632	B738_02089	Phpb_02972	PTE_04429	plu1294	PAU_03165	Ppb6_01268	VY86_01330
b0631	B738_02094	Phpb_02971	PTE_04428	plu1293	PAU_03166	Ppb6_01269	VY86_01335
b0630	B738_02099	Phpb_02970	PTE_04427	plu1292	PAU_03167	Ppb6_01270	VY86_01340
b0624	B738_02109	Phpb_02968	PTE_04425	plu1290	PAU_03169	Ppb6_01272	VY86_01350
b1335	B738_02119	Phpb_02966	PTE_04422	plu1288	PAU_03171	Ppb6_01274	VY86_01360
b2673	B738_02124	Phpb_02965	PTE_04421	plu1287	PAU_03172	Ppb6_01275	VY86_01365
b2677	B738_02159	Phpb_02961	PTE_04417	plu1283	PAU_03177	Ppb6_01279	VY86_01395
b2678	B738_02164	Phpb_02960	PTE_04416	plu1282	PAU_03178	Ppb6_01280	VY86_01400
b2679	B738_02169	Phpb_02959	PTE_04415	plu1281	PAU_03179	Ppb6_01281	VY86_01405
b2682	B738_02179	Phpb_02957	PTE_04413	plu1279	PAU_03181	Ppb6_01283	VY86_01415
b2683	B738_02184	Phpb_02956	PTE_04412	plu1278	PAU_03182	Ppb6_01284	VY86_01420
b2684	B738_02189	Phpb_02955	PTE_04411	plu1277	PAU_03183	Ppb6_01285	VY86_01425
b2685	B738_02194	Phpb_02954	PTE_04410	plu1276	PAU_03184	Ppb6_01286	VY86_01430
b2686	B738_02199	Phpb_02953	PTE_04409	plu1275	PAU_03185	Ppb6_01287	VY86_01435
b2581	B738_02204	Phpb_02952	PTE_04408	plu1274	PAU_03186	Ppb6_01288	VY86_01440
b2584	B738_02209	Phpb_02951	PTE_04407	plu1272	PAU_03188	Ppb6_01290	VY86_01450
b2585	B738_02214	Phpb_02950	PTE_04406	plu1271	PAU_03189	Ppb6_01291	VY86_01455
b2592	B738_22075	Phpb_01195	PTE_04349	plu1270	PAU_03190	Ppb6_03146	VY86_01480
b2593	B738_22070	Phpb_01194	PTE_04348	plu1269	PAU_03191	Ppb6_03147	VY86_01485
b2594	B738_22065	Phpb_01193	PTE_04347	plu1268	PAU_03192	Ppb6_03148	VY86_01490
b2599	B738_22045	Phpb_01190	PTE_04343	plu1265	PAU_03195	Ppb6_03151	VY86_01510
b2600	B738_22040	Phpb_01187	PTE_04342	plu1263	PAU_03198	Ppb6_03152	VY86_01525
b2601	B738_22035	Phpb_01186	PTE_04341	plu1262	PAU_03199	Ppb6_03153	VY86_01530
b2606	B738_22030	Phpb_01184	PTE_04339	plu1260	PAU_03201	Ppb6_03155	VY86_01540
b2607	B738_22025	Phpb_01183	PTE_04338	plu1259	PAU_03202	Ppb6_03156	VY86_01545
b2608	B738_22020	Phpb_01182	PTE_04337	plu1258	PAU_03203	Ppb6_03157	VY86_01550
b2609	B738_22015	Phpb_01181	PTE_04336	plu1257	PAU_03204	Ppb6_03158	VY86_01555
b2687	B738_21985	Phpb_01177	PTE_04332	plu1253	PAU_03208	Ppb6_03162	VY86_01575
b2696	B738_21960	Phpb_01171	PTE_04326	plu1251	PAU_03210	Ppb6_03165	VY86_01605
b2697	B738_21955	Phpb_01170	PTE_04325	plu1250	PAU_03211	Ppb6_03166	VY86_01610
b2699	B738_21950	Phpb_01169	PTE_04324	plu1249	PAU_03212	Ppb6_03167	VY86_01615
b2700	B738_21945	Phpb_01168	PTE_04323	plu1248	PAU_03213	Ppb6_03168	VY86_01620
b2836	B738_21930	Phpb_01166	PTE_04321	plu1246	PAU_03215	Ppb6_03170	VY86_01630
b0388	B738_21925	Phpb_01165	PTE_04320	plu1245	PAU_03216	Ppb6_03171	VY86_01635
b0243	B738_21920	Phpb_01164	PTE_04319	plu1244	PAU_03217	Ppb6_03172	VY86_01640
b0239	B738_21905	Phpb_01216	PTE_04317	plu1242	PAU_03219	Ppb6_03174	VY86_01650
b0238	B738_21900	Phpb_01215	PTE_04316	plu1241	PAU_03220	Ppb6_03175	VY86_01655
b0237	B738_21895	Phpb_01214	PTE_04315	plu1240	PAU_03221	Ppb6_03176	VY86_01660
b2620	B738_13243	Phpb_00519	PTE_00590	plu3378	PAU_01269	Ppb6_03120	VY86_01880
b2619	B738_13248	Phpb_00518	PTE_00591	plu3377	PAU_01270	Ppb6_03119	VY86_01885
b2618	B738_13253	Phpb_00517	PTE_00592	plu3376	PAU_01271	Ppb6_03118	VY86_01890
b2617	B738_13258	Phpb_00516	PTE_00593	plu3375	PAU_01272	Ppb6_03117	VY86_01895
b2616	B738_13263	Phpb_00515	PTE_00594	plu3374	PAU_01273	Ppb6_03116	VY86_01900
b2615	B738_13268	Phpb_00514	PTE_00595	plu3373	PAU_01274	Ppb6_03115	VY86_01905
b2580	B738_13278	Phpb_00512	PTE_00597	plu3371	PAU_01276	Ppb6_03113	VY86_01920
b2562	B738_13373	Phpb_00492	PTE_00626	plu3335	PAU_01310	Ppb6_03089	VY86_02020
b2563	B738_13368	Phpb_00493	PTE_00625	plu3336	PAU_01309	Ppb6_03090	VY86_02025
b2564	B738_13363	Phpb_00494	PTE_00624	plu3337	PAU_01308	Ppb6_03091	VY86_02030
b2565	B738_13358	Phpb_00495	PTE_00623	plu3338	PAU_01307	Ppb6_03092	VY86_02035
b2566	B738_13353	Phpb_00496	PTE_00622	plu3339	PAU_01306	Ppb6_03093	VY86_02040
b2568	B738_13343	Phpb_00498	PTE_00619	plu3341	PAU_01304	Ppb6_03096	VY86_02050
b2570	B738_13333	Phpb_00500	PTE_00617	plu3343	PAU_01302	Ppb6_03098	VY86_02060
b2572	B738_13318	Phpb_00502	PTE_00615	plu3345	PAU_01300	Ppb6_03100	VY86_02070
b2573	B738_13313	Phpb_00503	PTE_00614	plu3346	PAU_01299	Ppb6_03101	VY86_02075
b2574	B738_13308	Phpb_00504	PTE_00613	plu3347	PAU_01298	Ppb6_03102	VY86_02080
b0981,b2060	B738_06864	Phpb_00754	PTE_00383	plu3743	PAU_01075	Ppb6_00202	VY86_02180
b2062,b0983	B738_06879	Phpb_00756	PTE_00381	plu3745	PAU_01073	Ppb6_00200	VY86_02190
b0418	B738_04721	Phpb_00892	PTE_00234	plu3895	PAU_03480	Ppb6_01930	VY86_02445
b0417	B738_04716	Phpb_00893	PTE_00233	plu3896	PAU_03481	Ppb6_01931	VY86_02450
b0416	B738_04711	Phpb_00894	PTE_00232	plu3897	PAU_03482	Ppb6_01932	VY86_02455
b0415	B738_04706	Phpb_00895	PTE_00231	plu3898	PAU_03483	Ppb6_01933	VY86_02460
b0413	B738_04696	Phpb_00897	PTE_00229	plu3900	PAU_03485	Ppb6_01935	VY86_02470
b0408	B738_04681	Phpb_00899	PTE_00227	plu3902	PAU_03488	Ppb6_01937	VY86_02480
b0407	B738_04676	Phpb_00900	PTE_00226	plu3903	PAU_03489	Ppb6_01938	VY86_02485
b0406	B738_04671	Phpb_00901	PTE_00225	plu3904	PAU_03490	Ppb6_01939	VY86_02490
b0405	B738_04666	Phpb_00902	PTE_00224	plu3905	PAU_03491	Ppb6_01940	VY86_02495
b0404	B738_04661	Phpb_00903	PTE_00223	plu3906	PAU_03492	Ppb6_01941	VY86_02500
b0605	B738_05939	Phpb_00905	PTE_00222	plu3907	PAU_03493	Ppb6_01942	VY86_02505
b0400	B738_05904	Phpb_00908	PTE_00219	plu3910	PAU_03501	Ppb6_01945	VY86_02520
b0399	B738_05894	Phpb_00909	PTE_00218	plu3911	PAU_03502	Ppb6_01946	VY86_02525
b0596	B738_05844	Phpb_03455	PTE_04189	plu2727	PAU_00895	Ppb6_00071	VY86_02555
b0595	B738_05839	Phpb_03454	PTE_04188	plu2728	PAU_00894	Ppb6_00072	VY86_02560
b0594	B738_29203	Phpb_03453	PTE_04187	plu2729	PAU_00893	Ppb6_00073	VY86_02565
b0593,b2265	B738_29208	Phpb_01515	PTE_04186	plu3074	PAU_00892	Ppb6_00074	VY86_02570
b0589	B738_12177	Phpb_01152	PTE_04182	plu4625	PAU_00888	Ppb6_00078	VY86_02590
b0211	B738_12202	Phpb_03205	PTE_04150	plu0939	PAU_00857	Ppb6_00873	VY86_02610
b0213	B738_12217	Phpb_03207	PTE_04152	plu0941	PAU_00859	Ppb6_00871	VY86_02620
b0214	B738_12222	Phpb_03208	PTE_04153	plu0942	PAU_00860	Ppb6_00870	VY86_02625
b0215	B738_12227	Phpb_03209	PTE_04154	plu0943	PAU_00861	Ppb6_00869	VY86_02630
b2935	B738_12247	Phpb_03214	PTE_04160	plu0946	PAU_00868	Ppb6_00863	VY86_02645
b2925	B738_12282	Phpb_03219	PTE_04165	plu0957	PAU_00879	Ppb6_00853	VY86_02670
b0421	B738_04761	Phpb_00888	PTE_00239	plu3886	PAU_03438	Ppb6_02317	VY86_02685
b0422	B738_04766	Phpb_00887	PTE_00240	plu3885	PAU_03437	Ppb6_02316	VY86_02690
b0423	B738_04771	Phpb_00886	PTE_00241	plu3884	PAU_03436	Ppb6_02315	VY86_02695
b0425	B738_04781	Phpb_00884	PTE_00242	plu3882	PAU_03434	Ppb6_02314	VY86_02700
b0426	B738_04786	Phpb_00883	PTE_00243	plu3881	PAU_03433	Ppb6_02313	VY86_02705
b0429	B738_04806	Phpb_00880	PTE_00246	plu3878	PAU_03430	Ppb6_02310	VY86_02720
b0430	B738_04811	Phpb_00879	PTE_00247	plu3877	PAU_03429	Ppb6_02309	VY86_02725
b0431	B738_04816	Phpb_00878	PTE_00248	plu3876	PAU_03428	Ppb6_02308	VY86_02730
b0432	B738_04821	Phpb_00877	PTE_00249	plu3875	PAU_03427	Ppb6_02307	VY86_02735
b2408	B738_04831	Phpb_00876	PTE_00250	plu3874	PAU_03426	Ppb6_02306	VY86_02740
b0433	B738_04836	Phpb_00875	PTE_00251	plu3873	PAU_03425	Ppb6_02305	VY86_02745
b0434	B738_04841	Phpb_00874	PTE_00252	plu3872	PAU_03424	Ppb6_02304	VY86_02750
b0435	B738_04846	Phpb_00873	PTE_00253	plu3871	PAU_03423	Ppb6_02303	VY86_02755
b0437	B738_04861	Phpb_00871	PTE_00255	plu3869	PAU_03417	Ppb6_02287	VY86_02770
b0439	B738_07539	Phpb_00869	PTE_00257	plu3867	PAU_03415	Ppb6_02285	VY86_02780
b0440	B738_07534	Phpb_00868	PTE_00258	plu3866	PAU_03414	Ppb6_02284	VY86_02785
b0441	B738_07529	Phpb_00867	PTE_00259	plu3865	PAU_03413	Ppb6_02283	VY86_02790
b0442	B738_07524	Phpb_00866	PTE_00260	plu3864	PAU_03412	Ppb6_02282	VY86_02795
b0443	B738_07519	Phpb_00865	PTE_00261	plu3863	PAU_03411	Ppb6_02281	VY86_02800
b0447	B738_07494	Phpb_00862	PTE_00264	plu3860	PAU_03408	Ppb6_02278	VY86_02815
b0449	B738_07479	Phpb_00860	PTE_00266	plu3858	PAU_03406	Ppb6_02276	VY86_02825
b0450	B738_07474	Phpb_00859	PTE_00267	plu3857	PAU_03405	Ppb6_02275	VY86_02830
b0451	B738_07469	Phpb_00858	PTE_00268	plu3856	PAU_03404	Ppb6_02274	VY86_02835
b0453	B738_07454	Phpb_00856	PTE_00270	plu3854	PAU_03402	Ppb6_02272	VY86_02845
b0460	B738_07449	Phpb_00855	PTE_00272	plu3853	PAU_03401	Ppb6_02271	VY86_02850
b3266,b0462	B738_07444	Phpb_00854	PTE_00273	plu3852	PAU_03399	Ppb6_02270	VY86_02855
b0463	B738_07439	Phpb_00853	PTE_00274	plu3851	PAU_03398	Ppb6_02269	VY86_02860
b0464	B738_07434	Phpb_00852	PTE_00275	plu3850	PAU_03397	Ppb6_02268	VY86_02865
b0467	B738_07389	Phpb_00845	PTE_00283	plu3843	PAU_03390	Ppb6_02261	VY86_02900
b0469	B738_07384	Phpb_00844	PTE_00284	plu3842	PAU_03389	Ppb6_02260	VY86_02905
b0470	B738_07379	Phpb_00843	PTE_00285	plu3841	PAU_03388	Ppb6_02259	VY86_02910
b0471	B738_07374	Phpb_00842	PTE_00286	plu3840	PAU_03387	Ppb6_02258	VY86_02915
b0472	B738_07369	Phpb_00841	PTE_00287	plu3839	PAU_03386	Ppb6_02257	VY86_02920
b0473	B738_07364	Phpb_00839	PTE_00288	plu3837	PAU_03384	Ppb6_02256	VY86_02925
b0474	B738_07359	Phpb_00838	PTE_00289	plu3836	PAU_03383	Ppb6_02255	VY86_02930
b0475	B738_07354	Phpb_00837	PTE_00290	plu3835	PAU_03382	Ppb6_02254	VY86_02935
b0587	B738_07349	Phpb_00836	PTE_00291	plu3834	PAU_03381	Ppb6_02253	VY86_02940
b0477	B738_07344	Phpb_00835	PTE_00292	plu3833	PAU_03380	Ppb6_02252	VY86_02945
b0478	B738_07329	Phpb_00832	PTE_00300	plu3830	PAU_00977	Ppb6_03285	VY86_03015
b0480	B738_07314	Phpb_00830	PTE_00302	plu3828	PAU_00979	Ppb6_03282	VY86_03025
b0484	B738_07294	Phpb_00827	PTE_00306	plu3824	PAU_00988	Ppb6_03273	VY86_03040
b0487	B738_07289	Phpb_00826	PTE_00307	plu3823	PAU_00987	Ppb6_03274	VY86_03045
b0488	B738_07284	Phpb_00825	PTE_00308	plu3822	PAU_00986	Ppb6_03275	VY86_03050
b0489	B738_07279	Phpb_00824	PTE_00309	plu3821	PAU_00985	Ppb6_03276	VY86_03055
b0492	B738_07274	Phpb_00823	PTE_00310	plu3820	PAU_00984	Ppb6_03277	VY86_03060
b0493	B738_07269	Phpb_00822	PTE_00311	plu3819	PAU_00983	Ppb6_03278	VY86_03065
b0494	B738_07264	Phpb_00821	PTE_00312	plu3818	PAU_00982	Ppb6_03279	VY86_03070
b0495	B738_07259	Phpb_00820	PTE_00313	plu3817	PAU_00981	Ppb6_03280	VY86_03075
b0496	B738_07254	Phpb_00819	PTE_00314	plu3816	PAU_00980	Ppb6_03281	VY86_03080
b1012	B738_07249	Phpb_00818	PTE_00315	plu3815	PAU_00991	Ppb6_03269	VY86_03085
b0522	B738_07224	Phpb_00813	PTE_00319	plu3808	PAU_00996	Ppb6_03264	VY86_03105
b0523	B738_07219	Phpb_00812	PTE_00320	plu3807	PAU_00997	Ppb6_03263	VY86_03110
b0524	B738_07214	Phpb_00811	PTE_00321	plu3806	PAU_00998	Ppb6_03262	VY86_03115
b0525	B738_07209	Phpb_00810	PTE_00322	plu3805	PAU_00999	Ppb6_03261	VY86_03120
b0526	B738_07204	Phpb_00809	PTE_00323	plu3804	PAU_01000	Ppb6_03260	VY86_03125
b0528	B738_07199	Phpb_01801	PTE_00324	plu4316	PAU_01001	Ppb6_03259	VY86_03130
b0529	B738_07194	Phpb_01800	PTE_00325	plu4317	PAU_01002	Ppb6_03258	VY86_03135
b2733	B738_22165	Phpb_01894	PTE_03966	plu0722	PAU_00696	Ppb6_00131	VY86_03520
b2742	B738_02810	Phpb_01889	PTE_03961	plu0718	PAU_00691	Ppb6_00125	VY86_03540
b2743	B738_02805	Phpb_01888	PTE_03960	plu0717	PAU_00690	Ppb6_00124	VY86_03545
b2744	B738_02800	Phpb_01887	PTE_03959	plu0716	PAU_00689	Ppb6_00123	VY86_03550
b2745	B738_02795	Phpb_01886	PTE_03958	plu0715	PAU_00688	Ppb6_00122	VY86_03555
b2746	B738_02790	Phpb_01885	PTE_03957	plu0714	PAU_00687	Ppb6_00121	VY86_03560
b2747	B738_02785	Phpb_01884	PTE_03956	plu0713	PAU_00686	Ppb6_00120	VY86_03565
b2748	B738_02780	Phpb_01883	PTE_03955	plu0712	PAU_00685	Ppb6_00119	VY86_03570
b2751	B738_02770	Phpb_01881	PTE_03953	plu0710	PAU_00683	Ppb6_00117	VY86_03580
b2752	B738_02765	Phpb_01880	PTE_03952	plu0709	PAU_00682	Ppb6_00116	VY86_03585
b3368	B738_02760	Phpb_01879	PTE_03951	plu0708	PAU_00681	Ppb6_00115	VY86_03590
b4150	B738_02745	Phpb_01949	PTE_04072	plu0831	PAU_00771	Ppb6_00990	VY86_03595
b3131	B738_02740	Phpb_01950	PTE_04073	plu0832	PAU_00772	Ppb6_00989	VY86_03600
b3136	B738_02725	Phpb_01952	PTE_04075	plu0834	PAU_00774	Ppb6_00987	VY86_03610
b3140	B738_02700	Phpb_01955	PTE_04078	plu0837	PAU_00777	Ppb6_00984	VY86_03625
b3137,b2096	B738_02685	Phpb_01957	PTE_04080	plu0839	PAU_00779	Ppb6_00982	VY86_03635
b0120	B738_02670	Phpb_01961	PTE_04088	plu0842	PAU_00794	Ppb6_00978	VY86_03650
b0121	B738_02665	Phpb_01962	PTE_04089	plu0843	PAU_00795	Ppb6_00977	VY86_03655
b0122	B738_02660	Phpb_01963	PTE_04090	plu0844	PAU_00796	Ppb6_00976	VY86_03660
b0125	B738_02635	Phpb_01293	PTE_04094	plu0864,plu0860	PAU_00798	Ppb6_00972	VY86_03690
b4225	B738_02630	Phpb_04110	PTE_00524	plu2365	PAU_00799	Ppb6_00971	VY86_03695
b4224,b2783	B738_02625	Phpb_04111	PTE_00523,PTE_04095	plu2366	PAU_00800	Ppb6_00970	VY86_03700
b0126	B738_02620	Phpb_01288	PTE_04096	plu0867	PAU_00801	Ppb6_00969	VY86_03705
b0127	B738_02615	Phpb_01287	PTE_04097	plu0868	PAU_00802	Ppb6_00968	VY86_03710
b0128	B738_02610	Phpb_01286	PTE_04098	plu0869	PAU_00803	Ppb6_00967	VY86_03715
b0131	B738_02605	Phpb_01285	PTE_04099	plu0870	PAU_00804	Ppb6_00966	VY86_03720
b0133	B738_02600	Phpb_01284	PTE_04100	plu0871	PAU_00805	Ppb6_00965	VY86_03725
b0134	B738_02595	Phpb_01283	PTE_04101	plu0872	PAU_00806	Ppb6_00964	VY86_03730
b0142	B738_02590	Phpb_01282	PTE_04102	plu0873	PAU_00807	Ppb6_00963	VY86_03735
b0143	B738_02585	Phpb_01281	PTE_04103	plu0874	PAU_00808	Ppb6_00962	VY86_03740
b0144	B738_02580	Phpb_01280	PTE_04104	plu0875	PAU_00809	Ppb6_00961	VY86_03745
b0145	B738_02575	Phpb_01279	PTE_04105	plu0876	PAU_00810	Ppb6_00960	VY86_03750
b0146	B738_02570	Phpb_01278	PTE_04106	plu0877	PAU_00812	Ppb6_00959	VY86_03755
b0149	B738_02555	Phpb_01276	PTE_04108	plu0883	PAU_00814	Ppb6_00957	VY86_03765
b0154	B738_02545	Phpb_01266	PTE_04116	plu0902	PAU_00822	Ppb6_00912	VY86_03795
b0158	B738_02520	Phpb_01263	PTE_04119	plu0905	PAU_00826	Ppb6_00909	VY86_03825
b0159	B738_02515	Phpb_01262	PTE_04120	plu0906	PAU_00827	Ppb6_00908	VY86_03830
b0160	B738_02510	Phpb_01261	PTE_04121	plu0907	PAU_00828	Ppb6_00907	VY86_03835
b2781	B738_02480	Phpb_01257	PTE_04125	plu0911	PAU_00832	Ppb6_00903	VY86_03855
b2780	B738_02395	Phpb_01248	PTE_04133	plu0912	PAU_00840	Ppb6_00894	VY86_03875
b0612,b0770	B738_02380	Phpb_01240	PTE_04147	plu0926	PAU_00845	Ppb6_00891	VY86_03885
b2761	B738_22125	Phpb_01908	PTE_03980	plu0745	PAU_00706	Ppb6_01043	VY86_03900
b2760	B738_22120	Phpb_01909	PTE_03981	plu0746	PAU_00707	Ppb6_01042	VY86_03905
b2758	B738_22110	Phpb_01911	PTE_03983	plu0748	PAU_00709	Ppb6_01040	VY86_03915
b2756	B738_22095	Phpb_01913	PTE_03985	plu0750	PAU_00711	Ppb6_01038	VY86_03925
b3043	B738_03260	Phpb_03187	PTE_04000	plu0418,plu0769	PAU_00725	Ppb6_01031	VY86_04005
b2336	B738_03240	Phpb_03190	PTE_04003	plu0772	PAU_00728	Ppb6_01028	VY86_04020
b2335	B738_03230	Phpb_03192	PTE_04005	plu0774	PAU_00730	Ppb6_01026	VY86_04025
b2334	B738_03225	Phpb_03193	PTE_04006	plu0775	PAU_00731	Ppb6_01025	VY86_04030
b2333	B738_03220	Phpb_03194	PTE_04007	plu0776	PAU_00732	Ppb6_01024	VY86_04035
b3892	B738_03095	Phpb_01923,Phpb_00274	PTE_01923,PTE_04019	plu4889	PAU_00742,PAU_04390	Ppb6_00371,Ppb6_01017	VY86_04080
b3893	B738_03090	Phpb_00275,Phpb_01924	PTE_01922,PTE_04020	plu4888	PAU_04391,PAU_00743	Ppb6_00372,Ppb6_01016	VY86_04085
b0262	B738_02920	Phpb_01940	PTE_04050	plu0810	PAU_00762	Ppb6_00999	VY86_04145
b3668	B738_02895	Phpb_01944	PTE_04054	plu0814	PAU_00766	Ppb6_00995	VY86_04165
b3669	B738_02890	Phpb_01945	PTE_04055	plu0815	PAU_00767	Ppb6_00994	VY86_04170
b2762	B738_02885	Phpb_01878	PTE_03949	plu0705	PAU_00679	Ppb6_00114	VY86_04175
b2763	B738_02880	Phpb_01877	PTE_03948	plu0704	PAU_00678	Ppb6_00113	VY86_04180
b2765	B738_02865	Phpb_01875	PTE_03946	plu0702	PAU_00676	Ppb6_00111	VY86_04190
b0209	B738_02845	Phpb_01872	PTE_03943	plu0699	PAU_00673	Ppb6_00108	VY86_04205
b0200	B738_13828	Phpb_04174	PTE_00956	plu0698	PAU_00670	Ppb6_03791	VY86_04235
b0199	B738_13823	Phpb_04175	PTE_00957	plu0697	PAU_00669	Ppb6_03792	VY86_04240
b0198	B738_13818	Phpb_04176	PTE_00958	plu0696	PAU_00668	Ppb6_03793	VY86_04245
b0196	B738_13803	Phpb_04178	PTE_00960	plu0694	PAU_00666	Ppb6_03795	VY86_04255
b0195	B738_13798	Phpb_04179	PTE_00961	plu0693	PAU_00665	Ppb6_03796	VY86_04260
b0194	B738_13793	Phpb_04180	PTE_00962	plu0692	PAU_00664	Ppb6_03797	VY86_04265
b0189	B738_13778	Phpb_04182	PTE_00964	plu0690	PAU_00662	Ppb6_03799	VY86_04275
b0185	B738_13758	Phpb_04184	PTE_00966	plu0688	PAU_00660	Ppb6_03801	VY86_04350
b0184	B738_13753	Phpb_04185	PTE_00967	plu0687	PAU_00659	Ppb6_03802	VY86_04355
b0183	B738_13748	Phpb_04186	PTE_00968	plu0686	PAU_00658	Ppb6_03803	VY86_04360
b0182	B738_13743	Phpb_04187	PTE_00969	plu0685	PAU_00657	Ppb6_03804	VY86_04365
b0181	B738_13738	Phpb_04188	PTE_00970	plu0684	PAU_00656	Ppb6_03805	VY86_04370
b0180	B738_13733	Phpb_04189	PTE_00971	plu0683	PAU_00655	Ppb6_03806	VY86_04375
b0179	B738_13728	Phpb_04190	PTE_00972	plu0682	PAU_00654	Ppb6_03807	VY86_04380
b0178	B738_13723	Phpb_04191	PTE_00973	plu0681	PAU_00653	Ppb6_03808	VY86_04385
b0176	B738_13708	Phpb_04193	PTE_00975	plu0679	PAU_00651	Ppb6_03810	VY86_04395
b0175	B738_13703	Phpb_04194	PTE_00976	plu0678	PAU_00650	Ppb6_03811	VY86_04400
b0172	B738_13683	Phpb_04197	PTE_00979	plu0675	PAU_00647	Ppb6_03814	VY86_04415
b0171	B738_13678	Phpb_04198	PTE_00980	plu0674	PAU_00646	Ppb6_03815	VY86_04420
b0170	B738_13673	Phpb_04199	PTE_00981	plu0673	PAU_00645	Ppb6_03817	VY86_04425
b0169	B738_13668	Phpb_04200	PTE_00982	plu0672	PAU_00644	Ppb6_03818	VY86_04430
b0168	B738_13663	Phpb_04201	PTE_00986	plu0671	PAU_00643	Ppb6_03819	VY86_04435
b0167	B738_13658	Phpb_04202	PTE_00987	plu0670	PAU_00642	Ppb6_03820	VY86_04440
b0166	B738_13653	Phpb_04203	PTE_00988	plu0669	PAU_00641	Ppb6_03821	VY86_04445
b0163	B738_13648	Phpb_04204	PTE_00989	plu0668	PAU_00640	Ppb6_03822	VY86_04450
b2790	B738_13643	Phpb_04205	PTE_00990	plu0667	PAU_00639	Ppb6_03823	VY86_04455
b2791	B738_13633	Phpb_04207	PTE_00993	plu0665	PAU_00637	Ppb6_03824	VY86_04465
b2792	B738_13628	Phpb_04208	PTE_00994	plu0664	PAU_00636	Ppb6_03825	VY86_04470
b2793	B738_13623	Phpb_04210	PTE_00995	plu0663	PAU_00635	Ppb6_03826	VY86_04475
b2795	B738_04906	Phpb_04212	PTE_00997	plu0661	PAU_00611	Ppb6_03849	VY86_04535
b2798	B738_04911	Phpb_04213	PTE_00998	plu0660	PAU_00610	Ppb6_03850	VY86_04540
b2806	B738_04951	Phpb_04219	PTE_01004	plu0654	PAU_00604	Ppb6_03856	VY86_04570
b2807	B738_04956	Phpb_04220	PTE_01005	plu0653	PAU_00603	Ppb6_03857	VY86_04575
b2808	B738_04961	Phpb_04221	PTE_01006	plu0652	PAU_00602	Ppb6_03858	VY86_04580
b2810	B738_04966	Phpb_04222	PTE_01008	plu0651	PAU_00601	Ppb6_03859	VY86_04585
b2811	B738_04971	Phpb_04223	PTE_01009	plu0650	PAU_00600	Ppb6_03860	VY86_04590
b2812	B738_04976	Phpb_04224	PTE_01010	plu0649	PAU_00599	Ppb6_03861	VY86_04595
b2813	B738_04981	Phpb_04225	PTE_01011	plu0648	PAU_00598	Ppb6_03862	VY86_04600
b2817	B738_04991	Phpb_04228	PTE_01017	plu0645	PAU_00595	Ppb6_03864	VY86_04625
b2818	B738_04996	Phpb_04229	PTE_01018	plu0644	PAU_00593	Ppb6_03865	VY86_04630
b2819	B738_05146	Phpb_04288	PTE_01033	plu0633	PAU_00592	Ppb6_03866	VY86_04735
b2820	B738_05151	Phpb_04287	PTE_01034	plu0632	PAU_00591	Ppb6_03867	VY86_04740
b2823	B738_05176	Phpb_04284	PTE_01037	plu0629	PAU_00588	Ppb6_03870	VY86_04755
b2825	B738_05191	Phpb_04282	PTE_01039	plu0627	PAU_00586	Ppb6_03872	VY86_04765
b2826	B738_05196	Phpb_04281	PTE_01040	plu0626	PAU_00585	Ppb6_03873	VY86_04770
b2827	B738_05206	Phpb_04277	PTE_01043	plu0623	PAU_00582	Ppb6_03876	VY86_04785
b2829	B738_05221	Phpb_04275	PTE_01045	plu0621	PAU_00580	Ppb6_03878	VY86_04795
b2830	B738_05226	Phpb_04274	PTE_01046	plu0620	PAU_00579	Ppb6_03879	VY86_04800
b0068	B738_05231	Phpb_04273	PTE_01048	plu0619	PAU_00578	Ppb6_03880	VY86_04805
b0067	B738_05236	Phpb_04272	PTE_01049	plu0618	PAU_00577	Ppb6_03881	VY86_04810
b0066	B738_05241	Phpb_04271	PTE_01050	plu0617	PAU_00576	Ppb6_03882	VY86_04815
b0059	B738_05266	Phpb_04267	PTE_01057	plu0615	PAU_00573	Ppb6_03883	VY86_04840
b0058	B738_05271	Phpb_04266	PTE_01058	plu0614	PAU_00572	Ppb6_03884	VY86_04845
b0055	B738_05276	Phpb_04264	PTE_01060	plu0613	PAU_00571	Ppb6_03886	VY86_04850
b0054	B738_05281	Phpb_04263	PTE_01061	plu0612	PAU_00570	Ppb6_03887	VY86_04855
b0052	B738_05296	Phpb_04261	PTE_01063	plu0610	PAU_00568	Ppb6_03889	VY86_04865
b0051	B738_05301	Phpb_04260	PTE_01064	plu0609	PAU_00567	Ppb6_03890	VY86_04870
b0050	B738_23153	Phpb_04259	PTE_01065	plu0608	PAU_00566	Ppb6_03891	VY86_04875
b0049	B738_23158	Phpb_04258	PTE_01066	plu0607	PAU_00565	Ppb6_03892	VY86_04880
b0048	B738_23163	Phpb_04257	PTE_01067	plu0606	PAU_00564	Ppb6_03893	VY86_04885
b3823,b1798	B738_23168	Phpb_04256	PTE_01068	plu0605	PAU_00563	Ppb6_03894	VY86_04890
b0033	B738_23173	Phpb_04255	PTE_01069	plu0604	PAU_00562	Ppb6_03896	VY86_04895
b0031	B738_23188	Phpb_04253	PTE_01071	plu0602	PAU_00560	Ppb6_03898	VY86_04905
b0029	B738_23193	Phpb_04252	PTE_01072	plu0594	PAU_00559	Ppb6_03899	VY86_04910
b0028	B738_23198	Phpb_04251	PTE_01073	plu0593	PAU_00558	Ppb6_03900	VY86_04915
b0027	B738_23203	Phpb_04250	PTE_01074	plu0592	PAU_00556	Ppb6_03901	VY86_04920
b0025	B738_23218	Phpb_04248	PTE_01076	plu0590	PAU_00554	Ppb6_03903	VY86_04930
b0023	B738_23223	Phpb_04247	PTE_01077	plu0589	PAU_00553	Ppb6_03904	VY86_04935
b0019	B738_23233	Phpb_04245	PTE_01079	plu0587	PAU_00551	Ppb6_03906	VY86_04945
b0015	B738_13049	Phpb_04243	PTE_01086	plu0580	PAU_00544	Ppb6_03912	VY86_04975
b0014	B738_13044	Phpb_04242	PTE_01088	plu0579	PAU_00543	Ppb6_03913	VY86_04980
b0010	B738_13039	Phpb_04241	PTE_01089	plu0578	PAU_00542	Ppb6_03914	VY86_04985
b0651,b2162	B738_12949	Phpb_01822	PTE_01178	plu4289	PAU_00466	Ppb6_03349	VY86_05035
b1301	B738_12939	Phpb_01824	PTE_01176	plu4287	PAU_00468	Ppb6_03347	VY86_05045
b1385	B738_12929	Phpb_01826	PTE_01174	plu4285	PAU_00470	Ppb6_03345	VY86_05055
b4371	B738_12729	Phpb_01847	PTE_01153	plu4252	PAU_00487	Ppb6_03962	VY86_05225
b4372	B738_12724	Phpb_01848	PTE_01152	plu4251	PAU_00488	Ppb6_03961	VY86_05230
b4373	B738_12719	Phpb_01849	PTE_01151	plu4250	PAU_00489	Ppb6_03960	VY86_05235
b4375	B738_12714	Phpb_01850	PTE_01150	plu4249	PAU_00490	Ppb6_03959	VY86_05240
b4376	B738_12709	Phpb_01851	PTE_01149	plu4248	PAU_00491	Ppb6_03958	VY86_05245
b4377	B738_12704	Phpb_01852	PTE_01148	plu4247	PAU_00492	Ppb6_03957	VY86_05250
b4378	B738_12699	Phpb_01853	PTE_01147	plu0517	PAU_00493	Ppb6_03956	VY86_05255
b2164,b2161	B738_12694	Phpb_01855	PTE_01146	plu0519	PAU_00494	Ppb6_03955	VY86_05260
b4381	B738_12689	Phpb_01856	PTE_01140	plu0520	PAU_00513	Ppb6_03946	VY86_05265
b4383	B738_12679	Phpb_01858	PTE_01138	plu0521	PAU_00515	Ppb6_03944	VY86_05275
b4384	B738_12674	Phpb_01859	PTE_01137	plu0522	PAU_00516	Ppb6_03943	VY86_05280
b4387	B738_25535	Phpb_00920	PTE_01115	plu0550	PAU_00519	Ppb6_03938	VY86_05300
b4388	B738_25530	Phpb_00921	PTE_01114	plu0551	PAU_00520	Ppb6_03937	VY86_05305
b4389	B738_25525	Phpb_00922	PTE_01113	plu0552	PAU_00521	Ppb6_03936	VY86_05310
b4390	B738_25520	Phpb_00923	PTE_01112	plu0553	PAU_00522	Ppb6_03935	VY86_05315
b4391	B738_25510	Phpb_00925	PTE_01110	plu0555	PAU_00524	Ppb6_03933	VY86_05325
b4393	B738_25495	Phpb_00927	PTE_01108	plu0557	PAU_00527	Ppb6_03931	VY86_05335
b4394	B738_25490	Phpb_00928	PTE_01107	plu0558	PAU_00528	Ppb6_03930	VY86_05340
b4395	B738_14105	Phpb_00929	PTE_01106	plu0559	PAU_00529	Ppb6_03929	VY86_05345
b4396	B738_14100	Phpb_00930	PTE_01105	plu0560	PAU_00530	Ppb6_03928	VY86_05350
b4401	B738_14090	Phpb_00932	PTE_01103	plu0562	PAU_00532	Ppb6_03925	VY86_05360
b0003	B738_14080	Phpb_00934	PTE_01100	plu0564	PAU_00534	Ppb6_03923	VY86_05370
b0004	B738_14075	Phpb_00935	PTE_01099	plu0565	PAU_00535	Ppb6_03922	VY86_05375
b0006	B738_14070	Phpb_00936	PTE_01098	plu0566	PAU_00536	Ppb6_03921	VY86_05395
b0008	B738_14065	Phpb_04232	PTE_01097	plu0568	PAU_00538	Ppb6_03919	VY86_05415
b0009	B738_14060	Phpb_04233	PTE_01096	plu0569	PAU_00539	Ppb6_03918	VY86_05420
b4049	B738_14040	Phpb_01715	PTE_02501	plu4364	PAU_03915	Ppb6_01351	VY86_05450
b4051	B738_14035	Phpb_01716	PTE_02496	plu4360	PAU_03914	Ppb6_01349	VY86_05455
b4052	B738_14030	Phpb_01717	PTE_02495	plu4359	PAU_03913	Ppb6_01348	VY86_05460
b4053	B738_14025	Phpb_01718	PTE_02494	plu4358	PAU_03912	Ppb6_01347	VY86_05465
b4054	B738_14020	Phpb_01719	PTE_02493	plu4357	PAU_03911	Ppb6_01346	VY86_05470
b2166,b2160	B738_14005	Phpb_01721	PTE_02490	plu4352	PAU_03910	Ppb6_01341	VY86_05500
b2165	B738_14000	Phpb_01722	PTE_02489	plu4351	PAU_03909	Ppb6_01340	VY86_05505
b4058	B738_13995	Phpb_01723	PTE_02488	plu4350	PAU_03908	Ppb6_01339	VY86_05515
b4059	B738_13990,B738_08664,B738_21288	Phpb_01724	PTE_02487	plu4349	PAU_03907	Ppb6_01338	VY86_05520
b4018	B738_13980	Phpb_01685	PTE_02523	plu4392	PAU_00420	Ppb6_03383	VY86_05525
b4024	B738_13940	Phpb_01698	PTE_02515	plu4380	PAU_03933	Ppb6_01369	VY86_05560
b4025	B738_13935	Phpb_01699	PTE_02514	plu4379	PAU_03932	Ppb6_01368	VY86_05565
b4039	B738_13930	Phpb_01700	PTE_02513	plu4378	PAU_03931	Ppb6_01367	VY86_05570
b4042	B738_13910	Phpb_01703	PTE_02510	plu4375	PAU_03928	Ppb6_01364	VY86_05585
b4043	B738_13905	Phpb_01704	PTE_02509	plu4374	PAU_03927	Ppb6_01363	VY86_05590
b4046	B738_13900	Phpb_01705	PTE_02508	plu4373	PAU_03925	Ppb6_01362	VY86_05595
b4015	B738_13855	Phpb_01682	PTE_02526	plu4395	PAU_00417	Ppb6_03386	VY86_05620
b4006	B738_00496	Phpb_01442	PTE_02060	plu0495	PAU_00406	Ppb6_03436	VY86_05660
b4005	B738_00501	Phpb_01441	PTE_02061	plu0494	PAU_00405	Ppb6_03437	VY86_05665
b4001	B738_00506	Phpb_01440	PTE_02062	plu0493	PAU_00404	Ppb6_03438	VY86_05670
b4000	B738_00511	Phpb_01439	PTE_02063	plu0492	PAU_00403	Ppb6_03439	VY86_05675
b3999	B738_00516	Phpb_01438	PTE_02064	plu0491	PAU_00402	Ppb6_03440	VY86_05680
b3998	B738_00521	Phpb_01437	PTE_02065	plu0490	PAU_00401	Ppb6_03441	VY86_05685
b3997	B738_00526	Phpb_01436	PTE_02066	plu0489	PAU_00400	Ppb6_03442	VY86_05690
b3994	B738_00541	Phpb_01431	PTE_02070	plu0486	PAU_00394	Ppb6_03448	VY86_05705
b3993	B738_00546	Phpb_01430	PTE_02071	plu0485	PAU_00393	Ppb6_03449	VY86_05710
b3992	B738_00551	Phpb_01429	PTE_02072	plu0484	PAU_00392	Ppb6_03450	VY86_05715
b4407	B738_00556	Phpb_01428	PTE_02073	plu0483	PAU_00391	Ppb6_03451	VY86_05720
b3991	B738_00561	Phpb_01427	PTE_02074	plu0482	PAU_00390	Ppb6_03452	VY86_05725
b3710	B738_00621	Phpb_01418	PTE_02083	plu0472	PAU_00380	Ppb6_02667	VY86_05765
b3418	B738_00626	Phpb_01417	PTE_02084	plu0471	PAU_00379	Ppb6_02668	VY86_05770
b3417	B738_00631	Phpb_01415	PTE_02085	plu0470	PAU_00377	Ppb6_02669	VY86_05775
b3416	B738_00636	Phpb_01414	PTE_02086	plu0469	PAU_00376	Ppb6_02670	VY86_05780
b4032	B738_00676	Phpb_01406	PTE_02090	plu0460	PAU_00369	Ppb6_02673	VY86_05810
b4033	B738_00691	Phpb_01405	PTE_02091	plu0459	PAU_00368	Ppb6_02674	VY86_05815
b4034	B738_00696	Phpb_01404	PTE_02092	plu0458	PAU_00367	Ppb6_02675	VY86_05820
b4036	B738_00711	Phpb_01402	PTE_02094	plu0456	PAU_00365	Ppb6_02677	VY86_05830
b3628	B738_00726	Phpb_01398	PTE_02096	plu0452	PAU_00363	Ppb6_02656	VY86_05845
b3988	B738_00786	Phpb_01387	PTE_02105	plu0440	PAU_00351	Ppb6_02644	VY86_05910
b3987	B738_00791	Phpb_01386	PTE_02106	plu0439	PAU_00350	Ppb6_02643	VY86_05915
b3986	B738_00796	Phpb_01385	PTE_02108	plu0438	PAU_00349	Ppb6_02642	VY86_05920
b3985	B738_00801	Phpb_01384	PTE_02109	plu0437	PAU_00348	Ppb6_02641	VY86_05925
b3984	B738_00806	Phpb_01383	PTE_02110	plu0436	PAU_00347	Ppb6_02640	VY86_05930
b3983	B738_00811	Phpb_01382	PTE_02111	plu0435	PAU_00346	Ppb6_02639	VY86_05935
b3982	B738_00816	Phpb_01381	PTE_02112	plu0434	PAU_00345	Ppb6_02638	VY86_05940
b3981	B738_00821	Phpb_01380	PTE_02113	plu0433	PAU_00344	Ppb6_02637	VY86_05945
b3341	B738_00841	Phpb_01377	PTE_02117	plu0430	PAU_00340	Ppb6_01418	VY86_05960
b3342	B738_00846	Phpb_01376	PTE_02118	plu0429	PAU_00339	Ppb6_01417	VY86_05965
b3343	B738_00851	Phpb_01375	PTE_02119	plu0428	PAU_00338	Ppb6_01416	VY86_05970
b3344	B738_00856	Phpb_01374	PTE_02120	plu0427	PAU_00337	Ppb6_01415	VY86_05975
b3346	B738_00871	Phpb_01372	PTE_02122	plu0425	PAU_00335	Ppb6_01413	VY86_05985
b3347	B738_00876	Phpb_01371	PTE_02123	plu0424	PAU_00333	Ppb6_01412	VY86_05990
b3349	B738_00886	Phpb_01369	PTE_02125	plu0422	PAU_00330	Ppb6_01408	VY86_06000
b4551	B738_00891	Phpb_01368	PTE_02126	plu0421	PAU_00329	Ppb6_01407	VY86_06005
b3352	B738_00906	Phpb_01365	PTE_02129	plu0420	PAU_00326	Ppb6_01404	VY86_06020
b2428	B738_00941	Phpb_01353	PTE_02139	plu0403	PAU_00315	Ppb6_01396	VY86_06085
b2429	B738_00946	Phpb_01352	PTE_02140	plu0402	PAU_00314	Ppb6_01395	VY86_06090
b3356	B738_00986	Phpb_01341	PTE_02145	plu0396	PAU_00307	Ppb6_00003	VY86_06115
b3357	B738_00991	Phpb_01340	PTE_02146	plu0395	PAU_00306	Ppb6_00004	VY86_06120
b3359	B738_00996	Phpb_01339	PTE_02147	plu0394	PAU_00305	Ppb6_00005	VY86_06125
b3360	B738_01001	Phpb_01338	PTE_02148	plu0393	PAU_00304	Ppb6_00006	VY86_06130
b3363	B738_01006	Phpb_01336	PTE_02150	plu0391	PAU_00302	Ppb6_00008	VY86_06140
b3860	B738_01031	Phpb_01327	PTE_02154	plu0381	PAU_00298	Ppb6_00012	VY86_06155
b3857	B738_01041	Phpb_01325	PTE_02156	plu0379	PAU_00296	Ppb6_00014	VY86_06165
b4214	B738_01056	Phpb_04358	PTE_01333	plu4559	PAU_04060	Ppb6_04311	VY86_06175
b4207	B738_01061	Phpb_04355	PTE_01334	plu4561	PAU_04061	Ppb6_04310	VY86_06180
b4203	B738_01116	Phpb_04347	PTE_01342	plu4570	PAU_04069	Ppb6_04302	VY86_06220
b4202	B738_01121	Phpb_04346	PTE_01343	plu4571	PAU_04070	Ppb6_04301	VY86_06225
b4200	B738_01131	Phpb_04344	PTE_01344	plu4573	PAU_04072	Ppb6_04299	VY86_06235
b4178	B738_01146	Phpb_04341	PTE_01347	plu4576	PAU_04075	Ppb6_04296	VY86_06250
b4175	B738_01156	Phpb_04339	PTE_01349	plu4578	PAU_04077	Ppb6_04294	VY86_06260
b4174	B738_01161	Phpb_04338	PTE_01350	plu4579	PAU_04078	Ppb6_04293	VY86_06265
b4173	B738_01166	Phpb_04337	PTE_01351	plu4580	PAU_04079	Ppb6_04292	VY86_06270
b4172	B738_01171	Phpb_04336	PTE_01352	plu4581	PAU_04080	Ppb6_04291	VY86_06275
b4170	B738_01186	Phpb_04334	PTE_01354	plu4583	PAU_04082	Ppb6_04289	VY86_06285
b4168	B738_01206	Phpb_04332	PTE_01356	plu4585	PAU_04084	Ppb6_04287	VY86_06295
b4162	B738_01221	Phpb_04323	PTE_01364	plu4595	PAU_04088	Ppb6_04281	VY86_06325
b4160	B738_01236	Phpb_04321	PTE_01366	plu4597	PAU_04090	Ppb6_04279	VY86_06340
b4159	B738_01241	Phpb_04320	PTE_01367	plu4598	PAU_04091	Ppb6_04278	VY86_06345
b3826	B738_18359	Phpb_01144	PTE_01401	plu4618	PAU_04109	Ppb6_04270	VY86_06420
b3822	B738_18349	Phpb_01146	PTE_01403	plu4620	PAU_04111	Ppb6_04268	VY86_06425
b3820	B738_18344	Phpb_01160	PTE_01404	plu4631	PAU_04112	Ppb6_04267	VY86_06430
b3819	B738_18339	Phpb_01161	PTE_01405	plu4632	PAU_04113	Ppb6_04266	VY86_06435
b3816	B738_18309	Phpb_00463	PTE_01407	plu4635	PAU_04116	Ppb6_04264	VY86_06450
b3813	B738_18304	Phpb_00462	PTE_01408	plu4636	PAU_04117	Ppb6_04263	VY86_06455
b3812	B738_18299	Phpb_00461	PTE_01409	plu4637	PAU_04118	Ppb6_04262	VY86_06460
b3811	B738_18294	Phpb_00460	PTE_01410	plu4638	PAU_04119	Ppb6_04261	VY86_06465
b4558	B738_18264	Phpb_00457	PTE_01413	plu4641	PAU_04122	Ppb6_04258	VY86_06480
b3807	B738_18259	Phpb_00456	PTE_01414	plu4642	PAU_04123	Ppb6_04257	VY86_06485
b3805	B738_00195	Phpb_00454	PTE_01416	plu4644	PAU_04125	Ppb6_04254	VY86_06495
b3804	B738_00200	Phpb_00453	PTE_01417	plu4645	PAU_04126	Ppb6_04253	VY86_06500
b3803	B738_00205	Phpb_00452	PTE_01418	plu4646	PAU_04127	Ppb6_04252	VY86_06505
b3802	B738_00210	Phpb_00451	PTE_01419	plu4647	PAU_04128	Ppb6_04251	VY86_06510
b3795	B738_00225	Phpb_00445	PTE_01426	plu4650	PAU_04130	Ppb6_04246	VY86_06540
b3794	B738_00230	Phpb_00444	PTE_01427	plu4651	PAU_04131	Ppb6_04245	VY86_06545
b3792	B738_00260	Phpb_00441	PTE_01430	plu4654	PAU_04134	Ppb6_04242	VY86_06560
b3791	B738_00265	Phpb_00440	PTE_01431	plu4655	PAU_04135	Ppb6_04241	VY86_06565
b3790	B738_00270	Phpb_00439	PTE_01432	plu4656	PAU_04136	Ppb6_04240	VY86_06570
b3788	B738_00285	Phpb_00437	PTE_01434	plu4658	PAU_04138	Ppb6_04238	VY86_06580
b3787	B738_00290	Phpb_00436	PTE_01435	plu4659	PAU_04139	Ppb6_04237	VY86_06585
b3786	B738_00295	Phpb_00435	PTE_01436	plu4660	PAU_04140	Ppb6_04236	VY86_06590
b3784	B738_00310	Phpb_00433	PTE_01438	plu4662	PAU_04142	Ppb6_04234	VY86_06600
b3781	B738_00325	Phpb_00431	PTE_01440	plu4664	PAU_04144	Ppb6_04232	VY86_06610
b3778	B738_00355	Phpb_00428	PTE_01443	plu4667	PAU_04147	Ppb6_04229	VY86_06625
b3773	B738_00370	Phpb_00426	PTE_01445	plu4669	PAU_04149	Ppb6_04227	VY86_06635
b3771	B738_00440	Phpb_00413	PTE_01458	plu4682	PAU_04162	Ppb6_04214	VY86_06700
b3770	B738_00445	Phpb_00412	PTE_01459	plu4683	PAU_04163	Ppb6_04213	VY86_06705
b3769	B738_00450	Phpb_00411	PTE_01460	plu4684	PAU_04164	Ppb6_04212	VY86_06710
b3671	B738_00455	Phpb_00410	PTE_01461	plu4685	PAU_04165	Ppb6_04211	VY86_06715
b3765	B738_00465	Phpb_00409	PTE_01462	plu4686	PAU_04166	Ppb6_04210	VY86_06720
b3764	B738_00470	Phpb_00408	PTE_01463	plu4687	PAU_04167	Ppb6_04209	VY86_06725
b3279	B738_24205	Phpb_01074	PTE_04402	plu4689	PAU_04172	Ppb6_02584	VY86_06765
b3281	B738_24195	Phpb_01076	PTE_04400	plu4691	PAU_04173	Ppb6_02588	VY86_06775
b3282	B738_24190	Phpb_01077	PTE_04399	plu4692	PAU_04174	Ppb6_02589	VY86_06780
b3283	B738_24185	Phpb_01078	PTE_04398	plu4693	PAU_04175	Ppb6_02590	VY86_06785
b4473	B738_24180	Phpb_01079	PTE_04397	plu4694	PAU_04176	Ppb6_02591	VY86_06790
b3287	B738_24175	Phpb_01080	PTE_04396	plu4695	PAU_04177	Ppb6_02592	VY86_06795
b3288	B738_24170	Phpb_01081	PTE_04395	plu4696	PAU_04178	Ppb6_02593	VY86_06800
b3290	B738_00005	Phpb_01083	PTE_04393	plu4698	PAU_04180	Ppb6_02595	VY86_06810
b4550	B738_00010	Phpb_01085	PTE_04392	plu4699	PAU_04188	Ppb6_02603	VY86_06815
b3292	B738_00015	Phpb_01086	PTE_04391	plu4700	PAU_04189	Ppb6_02604	VY86_06820
b3294	B738_00020	Phpb_01087	PTE_04390	plu4701	PAU_04190	Ppb6_02605	VY86_06825
b3295	B738_00025	Phpb_01088	PTE_04389	plu4702	PAU_04191	Ppb6_02606	VY86_06830
b3296	B738_00030	Phpb_01089	PTE_04388	plu4703	PAU_04192	Ppb6_02607	VY86_06835
b3297	B738_00040	Phpb_01090	PTE_04387	plu4704	PAU_04193	Ppb6_02608	VY86_06840
b3298	B738_00045	Phpb_01091	PTE_04386	plu4705	PAU_04194	Ppb6_02609	VY86_06845
b3300	B738_00055	Phpb_01093	PTE_04383	plu4706	PAU_04196	Ppb6_02611	VY86_06850
b3301	B738_00060	Phpb_01094	PTE_04382	plu4707	PAU_04197	Ppb6_02612	VY86_06855
b3303	B738_00070	Phpb_01096	PTE_04380	plu4709	PAU_04199	Ppb6_02614	VY86_06865
b3304	B738_00075	Phpb_01097	PTE_04379	plu4710	PAU_04200	Ppb6_02615	VY86_06870
b3305	B738_00080	Phpb_01098	PTE_04378	plu4711	PAU_04201	Ppb6_02616	VY86_06875
b3306	B738_00085	Phpb_01099	PTE_04377	plu4712	PAU_04202	Ppb6_02617	VY86_06880
b3307	B738_00090	Phpb_01100	PTE_04376	plu4713	PAU_04203	Ppb6_02618	VY86_06885
b3308	B738_00095	Phpb_01101	PTE_04375	plu4714	PAU_04204	Ppb6_02619	VY86_06890
b3309	B738_00100	Phpb_01102	PTE_04374	plu4715	PAU_04205	Ppb6_02620	VY86_06895
b3310	B738_00105	Phpb_01103	PTE_04373	plu4716	PAU_04206	Ppb6_02621	VY86_06900
b3311	B738_00110	Phpb_01104	PTE_04372	plu4717	PAU_04207	Ppb6_02622	VY86_06905
b3313	B738_00120	Phpb_01106	PTE_04370	plu4719	PAU_04208	Ppb6_02624	VY86_06915
b3314	B738_00125	Phpb_01107	PTE_04369	plu4720	PAU_04209	Ppb6_02625	VY86_06920
b3315	B738_00130	Phpb_01108	PTE_04368	plu4721	PAU_04210	Ppb6_02626	VY86_06925
b3316	B738_00135	Phpb_01109	PTE_04367	plu4722	PAU_04211	Ppb6_02627	VY86_06930
b3317	B738_00140	Phpb_01110	PTE_04366	plu4723	PAU_04212	Ppb6_02628	VY86_06935
b3318	B738_00145	Phpb_01111	PTE_04365	plu4724	PAU_04213	Ppb6_02629	VY86_06940
b3319	B738_00150	Phpb_01112	PTE_04364	plu4725	PAU_04214	Ppb6_02630	VY86_06945
b3320	B738_00155	Phpb_01113	PTE_04363	plu4726	PAU_04215	Ppb6_02631	VY86_06950
b3321	B738_00160	Phpb_01114	PTE_04362	plu4727	PAU_04216	Ppb6_02632	VY86_06955
b3336	B738_00165	Phpb_01115	PTE_04360	plu4728	PAU_04218	Ppb6_02633	VY86_06960
b3974	B738_24732	Phpb_01123	PTE_04352	plu4731	PAU_04223	Ppb6_01786	VY86_06990
b3973	B738_24727	Phpb_01124	PTE_04351	plu4732	PAU_04224	Ppb6_01787	VY86_06995
b3972	B738_24722	Phpb_01125	PTE_04350	plu4733	PAU_04225	Ppb6_01788	VY86_07000
b3967	B738_18244	Phpb_00059	PTE_01712	plu4734	PAU_04226	Ppb6_00243	VY86_07035
b3966	B738_18239	Phpb_00058	PTE_01711	plu4735	PAU_04227	Ppb6_00244	VY86_07040
b3965	B738_18234	Phpb_00057	PTE_01710	plu4736	PAU_04228	Ppb6_00245	VY86_07045
b3963	B738_18224	Phpb_00055	PTE_01708	plu4738	PAU_04231	Ppb6_00247	VY86_07055
b3962	B738_18219	Phpb_00054	PTE_01707	plu4739	PAU_04232	Ppb6_00248	VY86_07060
b3961	B738_18214	Phpb_00053	PTE_01706	plu4740	PAU_04233	Ppb6_00249	VY86_07065
b3960	B738_18209	Phpb_00052	PTE_01705	plu4741	PAU_04234	Ppb6_00250	VY86_07070
b3172	B738_18204,B738_09656	Phpb_00051	PTE_01704	plu4742	PAU_04235	Ppb6_00251	VY86_07075
b3959	B738_18199	Phpb_00050	PTE_01703	plu4743	PAU_04236	Ppb6_00252	VY86_07080
b3958	B738_18194	Phpb_00049	PTE_01702	plu4744	PAU_04237	Ppb6_00253	VY86_07085
b3957	B738_18189	Phpb_00048	PTE_01701	plu4745	PAU_04238	Ppb6_00254	VY86_07090
b3941	B738_17779	Phpb_00040	PTE_01694	plu4754	PAU_04242	Ppb6_00257	VY86_07125
b3940	B738_17774	Phpb_00039	PTE_01693	plu4755	PAU_04243	Ppb6_00258	VY86_07130
b3939	B738_17769	Phpb_00038	PTE_01692	plu4756	PAU_04244	Ppb6_00259	VY86_07135
b3938	B738_17764	Phpb_00037	PTE_01691	plu4757	PAU_04245	Ppb6_00260	VY86_07140
b3936	B738_17759	Phpb_00036	PTE_01690	plu4758	PAU_04246	Ppb6_00261	VY86_07145
b3933	B738_17729	Phpb_00033	PTE_01687	plu4761	PAU_04249	Ppb6_00264	VY86_07160
b3932	B738_17724	Phpb_00032	PTE_01686	plu4762	PAU_04250	Ppb6_00265	VY86_07165
b3930	B738_17709	Phpb_00030	PTE_01684	plu4764	PAU_04252	Ppb6_00267	VY86_07175
b3929	B738_17704	Phpb_00029	PTE_01683	plu4765	PAU_04253	Ppb6_00268	VY86_07180
b3928	B738_17699	Phpb_00028	PTE_01682	plu4766	PAU_04254	Ppb6_00269	VY86_07185
b3927	B738_17694	Phpb_00027	PTE_01681	plu4767	PAU_04256	Ppb6_00270	VY86_07190
b3926	B738_17689	Phpb_00026	PTE_01680	plu4768	PAU_04257	Ppb6_00271	VY86_07195
b3921	B738_17674	Phpb_00023	PTE_01678	plu4770	PAU_04260	Ppb6_00274	VY86_07205
b3920	B738_17669	Phpb_00022	PTE_01677	plu4771	PAU_04261	Ppb6_00275	VY86_07210
b3919	B738_17664	Phpb_00021	PTE_01676	plu4772	PAU_04262	Ppb6_00276	VY86_07215
b3917	B738_17659	Phpb_00020	PTE_01675	plu4773	PAU_04263	Ppb6_00277	VY86_07220
b3916	B738_26027	Phpb_00019	PTE_01674	plu4774	PAU_04264	Ppb6_00278	VY86_07225
b1409	B738_26022	Phpb_00018	PTE_01672	plu4775	PAU_04265	Ppb6_00279	VY86_07230
b2082	B738_15049	Phpb_00008,Phpb_00244	PTE_01900	plu0008	PAU_00006	Ppb6_00389	VY86_07320
b4484	B738_25992	Phpb_00366	PTE_02020	plu4793	PAU_04308	Ppb6_00282	VY86_07500
b3912	B738_25987	Phpb_00365	PTE_02019	plu4794	PAU_04309	Ppb6_00283	VY86_07505
b3911	B738_25982	Phpb_00364	PTE_02018	plu4795	PAU_04310	Ppb6_00284	VY86_07510
b3606	B738_26137	Phpb_00331	PTE_01981	plu4834	PAU_04344	Ppb6_00319	VY86_07705
b3608	B738_26162	Phpb_00328	PTE_01979	plu4838	PAU_04346	Ppb6_00321	VY86_07715
b3609	B738_09111	Phpb_00327	PTE_01978	plu4839	PAU_04347	Ppb6_00322	VY86_07720
b3611	B738_09116	Phpb_00326	PTE_01977	plu4840	PAU_04348	Ppb6_00323	VY86_07725
b3616	B738_09146	Phpb_00323	PTE_01974	plu4845	PAU_04351	Ppb6_00327	VY86_07740
b3617	B738_09151	Phpb_00322	PTE_01973	plu4846	PAU_04352	Ppb6_00328	VY86_07745
b3619	B738_09156	Phpb_00321	PTE_01972	plu4847	PAU_04353	Ppb6_00329	VY86_07750
b3620	B738_09161	Phpb_00320	PTE_01971	plu4848	PAU_04354	Ppb6_00330	VY86_07755
b3631	B738_09196	Phpb_00312	PTE_01965	plu4852	PAU_04358	Ppb6_00334	VY86_07785
b3632	B738_09201	Phpb_00311	PTE_01964	plu4853	PAU_04357	Ppb6_00333	VY86_07790
b3633	B738_09206	Phpb_00310	PTE_01963	plu4854	PAU_04360	Ppb6_00336	VY86_07795
b3634	B738_09216	Phpb_00308	PTE_01961	plu4856	PAU_04362	Ppb6_00338	VY86_07805
b3635	B738_09221	Phpb_00307	PTE_01960	plu4857	PAU_04363	Ppb6_00339	VY86_07810
b3636	B738_09251	Phpb_00301	PTE_01954	plu4863	PAU_04370	Ppb6_00345	VY86_07840
b3637	B738_09256	Phpb_00300	PTE_01953	plu4864	PAU_04371	Ppb6_00346	VY86_07845
b3640	B738_09276	Phpb_00297	PTE_01950	plu4867	PAU_04375	Ppb6_00349	VY86_07860
b3641	B738_09281	Phpb_00296	PTE_01949	plu4868	PAU_04376	Ppb6_00351	VY86_07865
b3642	B738_09286	Phpb_00295	PTE_01946	plu4869	PAU_04377	Ppb6_00352	VY86_07870
b3644	B738_09296	Phpb_00293	PTE_01944	plu4871	PAU_04379	Ppb6_00354	VY86_07880
b2100	B738_09316	Phpb_00279	PTE_01932	plu4883	PAU_04382	Ppb6_00361	VY86_07900
b3590	B738_09331	Phpb_00266	PTE_01929	plu4898	PAU_04384	Ppb6_00365	VY86_07910
b3591	B738_09336	Phpb_00267	PTE_01928	plu4897	PAU_04385	Ppb6_00366	VY86_07915
b3891	B738_09341	Phpb_00268	PTE_01927	plu4896	PAU_04386	Ppb6_00367	VY86_07920
b3706	B738_09386	Phpb_00254	PTE_01914	plu4905	PAU_04397	Ppb6_00378	VY86_07970
b3705	B738_09391	Phpb_00253	PTE_01913	plu4906	PAU_04398	Ppb6_00379	VY86_07975
b3703	B738_09406	Phpb_00251	PTE_01911	plu4909	PAU_04401	Ppb6_00382	VY86_07990
b3702	B738_09411	Phpb_00250	PTE_01910	plu0001	PAU_00001	Ppb6_00383	VY86_07995
b3701	B738_09416	Phpb_00249	PTE_01909	plu0002	PAU_00002	Ppb6_00384	VY86_08000
b3433	B738_15044	Phpb_00245	PTE_01901	plu0007	PAU_00005	Ppb6_00388	VY86_08035
b1156	B738_15099	Phpb_00486,Phpb_00224	PTE_01892	plu3327,plu0019	PAU_00014	Ppb6_00397	VY86_08050
b4506	B738_15184	Phpb_00221	PTE_01878	plu0035	PAU_00030	Ppb6_00411	VY86_08060
b3729	B738_15194	Phpb_00219	PTE_01876	plu0037	PAU_00033	Ppb6_00413	VY86_08070
b3730	B738_15199	Phpb_00218	PTE_01875	plu0038	PAU_00034	Ppb6_00414	VY86_08075
b3731	B738_15204	Phpb_00217	PTE_01874	plu0039	PAU_00035	Ppb6_00415	VY86_08080
b3732	B738_15209	Phpb_00216	PTE_01873	plu0040	PAU_00036	Ppb6_00416	VY86_08085
b3734	B738_15224	Phpb_00214	PTE_01871	plu0042	PAU_00038	Ppb6_00418	VY86_08095
b3735	B738_15229	Phpb_00213	PTE_01870	plu0043	PAU_00039	Ppb6_00419	VY86_08100
b3736	B738_15234	Phpb_00212	PTE_01869	plu0044	PAU_00040	Ppb6_00420	VY86_08105
b3737	B738_15239	Phpb_00211	PTE_01868	plu0045	PAU_00041	Ppb6_00421	VY86_08110
b3738	B738_15244	Phpb_00210	PTE_01867	plu0046	PAU_00042	Ppb6_00422	VY86_08115
b3739	B738_15249	Phpb_00209	PTE_01866	plu0047	PAU_00043	Ppb6_00423	VY86_08120
b3740	B738_15254	Phpb_00208	PTE_01865	plu0048	PAU_00044	Ppb6_00424	VY86_08125
b3741	B738_15259	Phpb_00207	PTE_01864	plu0049	PAU_00045	Ppb6_00425	VY86_08130
b3742	B738_15264	Phpb_00206	PTE_01863	plu0050	PAU_00046	Ppb6_00426	VY86_08135
b3743	B738_15269	Phpb_00205	PTE_01862	plu0051	PAU_00047	Ppb6_00427	VY86_08140
b3744	B738_15274	Phpb_00204	PTE_01861	plu0052	PAU_00048	Ppb6_00428	VY86_08145
b3748	B738_15299	Phpb_00201	PTE_01858	plu0055	PAU_00051	Ppb6_00431	VY86_08160
b3749	B738_15304	Phpb_00200	PTE_01857	plu0056	PAU_00052	Ppb6_00432	VY86_08165
b3750	B738_15309	Phpb_00199	PTE_01856	plu0057	PAU_00053	Ppb6_00433	VY86_08170
b3751	B738_15314	Phpb_00198	PTE_01855	plu0058	PAU_00054	Ppb6_00434	VY86_08175
b3752	B738_15319	Phpb_00197	PTE_01854	plu0059	PAU_00055	Ppb6_00435	VY86_08180
b4067	B738_18489	Phpb_02000	PTE_02441	plu0072	PAU_00060	Ppb6_00630	VY86_08225
b4068	B738_18484	Phpb_01999	PTE_02440	plu0073	PAU_00061	Ppb6_00629	VY86_08230
b4069	B738_18479	Phpb_01998	PTE_02439	plu0074	PAU_00062	Ppb6_00628	VY86_08235
b3908	B738_18474	Phpb_01997	PTE_02438	plu0075	PAU_00063	Ppb6_00627	VY86_08240
b3910	B738_18469	Phpb_01996	PTE_02437	plu0076	PAU_00064	Ppb6_00626	VY86_08245
b3384	B738_04581	Phpb_01986	PTE_02430	plu0084	PAU_00066	Ppb6_00624	VY86_08320
b3385	B738_04576	Phpb_01985	PTE_02429	plu0085	PAU_00067	Ppb6_00623	VY86_08325
b3386	B738_04571	Phpb_01984	PTE_02428	plu0086	PAU_00068	Ppb6_00622	VY86_08330
b3389	B738_04546	Phpb_01981	PTE_02425	plu0089	PAU_00071	Ppb6_00619	VY86_08345
b3390	B738_04541	Phpb_01980	PTE_02424	plu0090	PAU_00072	Ppb6_00618	VY86_08350
b3395	B738_04516	Phpb_01976	PTE_02420	plu0094	PAU_00076	Ppb6_00614	VY86_08370
b3397	B738_04501	Phpb_01974	PTE_02418	plu0096	PAU_00078	Ppb6_00612	VY86_08380
b3400	B738_04486	Phpb_01972	PTE_02416	plu0098	PAU_00081	Ppb6_00610	VY86_08390
b3401	B738_04481	Phpb_01971	PTE_02415	plu0099	PAU_00082	Ppb6_00609	VY86_08395
b3403	B738_04476	Phpb_00406	PTE_02414	plu0100	PAU_00083	Ppb6_00608	VY86_08420
b3439	B738_04471	Phpb_00405	PTE_02413	plu0101	PAU_00085,PAU_00084	Ppb6_00607	VY86_08425
b2977	B738_04446	Phpb_00402	PTE_02409	plu0104	PAU_00088	Ppb6_00604	VY86_08450
b0340	B738_04396	Phpb_02942	PTE_01475,PTE_02390	plu0112	PAU_00092	Ppb6_00601	VY86_08485
b3492	B738_04351	Phpb_01463	PTE_02382	plu0118	PAU_00098	Ppb6_00538	VY86_08555
b3493	B738_04346	Phpb_01462	PTE_02381	plu0119	PAU_00099	Ppb6_00539	VY86_08560
b3494	B738_04341	Phpb_01461	PTE_02380	plu0120	PAU_00100	Ppb6_00540	VY86_08565
b3495	B738_04336	Phpb_01460	PTE_02379	plu0121	PAU_00105	Ppb6_00547	VY86_08585
b1761	B738_04331	Phpb_01459	PTE_02378	plu0122	PAU_00106	Ppb6_00548	VY86_08590
b3497	B738_04326	Phpb_01458	PTE_02377	plu0123	PAU_00107	Ppb6_00549	VY86_08595
b3498	B738_04321	Phpb_01457	PTE_02376	plu0124	PAU_00108	Ppb6_00550	VY86_08600
b4322	B738_04246	Phpb_02924	PTE_02353	plu0170	PAU_00120	Ppb6_00561	VY86_08810
b4324	B738_04241	Phpb_02923	PTE_02352	plu0171	PAU_00121	Ppb6_00562	VY86_08815
b3577	B738_04226	Phpb_02921	PTE_02350	plu0173	PAU_00123	Ppb6_00564	VY86_08825
b3578	B738_04221	Phpb_02920	PTE_02349	plu0174	PAU_00124	Ppb6_00565	VY86_08830
b3526	B738_04191	Phpb_02917	PTE_02346	plu0177	PAU_00127	Ppb6_00568	VY86_08845
b1850	B738_04186	Phpb_02916	PTE_02345	plu0178	PAU_00128	Ppb6_00569	VY86_08850
b3426	B738_04181	Phpb_02911	PTE_02343	plu0194	PAU_00133	Ppb6_00575	VY86_08870
b3884	B738_04176	Phpb_02910	PTE_02342	plu0195	PAU_00134	Ppb6_00576	VY86_08875
b3424	B738_04171	Phpb_02909	PTE_02341	plu0196	PAU_00135	Ppb6_00577	VY86_08880
b3425	B738_04166	Phpb_02908	PTE_02340	plu0197	PAU_00136	Ppb6_00578	VY86_08885
b3414	B738_04161	Phpb_02907	PTE_02339	plu0198	PAU_00137	Ppb6_00579	VY86_08890
b3413	B738_04156	Phpb_02906	PTE_02338	plu0199	PAU_00138	Ppb6_00580	VY86_08895
b3412	B738_04151	Phpb_02905	PTE_02337	plu0204	PAU_00148	Ppb6_00589	VY86_08900
b3410	B738_04136	Phpb_02900	PTE_02334	plu0207	PAU_00150	Ppb6_00590	VY86_08930
b3409	B738_04131	Phpb_02899	PTE_02333	plu0208	PAU_00151	Ppb6_00591	VY86_08935
b3408	B738_04126	Phpb_02898	PTE_02332	plu0209	PAU_00152	Ppb6_00592	VY86_08940
b3407	B738_04121	Phpb_02897	PTE_02331	plu0210	PAU_00153	Ppb6_00593	VY86_08945
b3406	B738_04116	Phpb_02896	PTE_02330	plu0211	PAU_00155	Ppb6_00537	VY86_08960
b3405	B738_04086	Phpb_02895	PTE_02326	plu0212	PAU_00160	Ppb6_00531	VY86_08990
b3404	B738_04081	Phpb_02894	PTE_02325	plu0213	PAU_00161	Ppb6_00530	VY86_08995
b3727	B738_04066	Phpb_02892	PTE_02323	plu0215	PAU_00163	Ppb6_00528	VY86_09005
b3726	B738_04056	Phpb_02891	PTE_02322	plu0216	PAU_00164	Ppb6_00527	VY86_09010
b3724	B738_04041	Phpb_02889	PTE_02320	plu0218	PAU_00166	Ppb6_00525	VY86_09020
b3866	B738_03971	Phpb_02224	PTE_02311	plu0229	PAU_00174	Ppb6_00520	VY86_09055
b3867	B738_03966	Phpb_02223	PTE_02310	plu0230	PAU_00175	Ppb6_00519	VY86_09065
b3869	B738_23558	Phpb_00465	PTE_02299	plu0236	PAU_00178	Ppb6_00514	VY86_09100
b3870	B738_23563	Phpb_00466	PTE_02298	plu0237	PAU_00179	Ppb6_00513	VY86_09105
b3871	B738_23568	Phpb_00467	PTE_02297	plu0238	PAU_00180	Ppb6_00512	VY86_09110
b3887	B738_23598	Phpb_00472	PTE_02292	plu0242	PAU_00184	Ppb6_00506	VY86_09135
b3888	B738_23603	Phpb_00473	PTE_02291	plu0243	PAU_00185	Ppb6_00505	VY86_09140
b3655	B738_23618	Phpb_00475	PTE_02288	plu0245	PAU_00188	Ppb6_00502	VY86_09155
b3653	B738_23638	Phpb_00477	PTE_02286	plu0248	PAU_00191	Ppb6_00498	VY86_09205
b1477	B738_23643	Phpb_04629	PTE_02282	plu2085	PAU_02509	Ppb6_01775	VY86_09215
b4312	B738_24647	Phpb_04583	PTE_02273	plu0260	PAU_00197	Ppb6_00488	VY86_09270
b3650	B738_24567	Phpb_04571	PTE_02261	plu0272	PAU_00209	Ppb6_00476	VY86_09330
b3649	B738_24562	Phpb_04570	PTE_02260	plu0273	PAU_00210	Ppb6_00475	VY86_09335
b3648	B738_24557	Phpb_04569	PTE_02259	plu0274	PAU_00211	Ppb6_00474	VY86_09340
b3647	B738_17552	Phpb_04554	PTE_02248	plu0286	PAU_00221	Ppb6_00462	VY86_09395
b3646	B738_17557	Phpb_04553	PTE_02247	plu0287	PAU_00222	Ppb6_00461	VY86_09400
b3689	B738_17562	Phpb_04552	PTE_02246	plu0288	PAU_00223	Ppb6_00460	VY86_09405
b3688	B738_17567	Phpb_04551	PTE_02245	plu0289	PAU_00224	Ppb6_00844	VY86_09410
b3572	B738_17572	Phpb_04550	PTE_02244	plu0291	PAU_00225	Ppb6_00842	VY86_09415
b3549	B738_17577	Phpb_04549	PTE_02243	plu0292	PAU_00226	Ppb6_00841	VY86_09420
b3560	B738_17582	Phpb_04548	PTE_02242	plu0293	PAU_00227	Ppb6_00840	VY86_09425
b3559	B738_17587	Phpb_04547	PTE_02241	plu0294	PAU_00228	Ppb6_00839	VY86_09430
b3544	B738_19027	Phpb_04536	PTE_02230	plu0300	PAU_00231	Ppb6_00832	VY86_09510
b3543	B738_19032	Phpb_04535	PTE_02229	plu0301	PAU_00232	Ppb6_00831	VY86_09515
b3542	B738_19037	Phpb_04534	PTE_02228	plu0302	PAU_00233	Ppb6_00830	VY86_09520
b3541	B738_19042	Phpb_04533	PTE_02227	plu0303	PAU_00234	Ppb6_00829	VY86_09525
b3540	B738_19047	Phpb_04532	PTE_02226	plu0304	PAU_00235	Ppb6_00828	VY86_09530
b3522	B738_19072	Phpb_04523	PTE_02211	plu0308	PAU_00242	Ppb6_00822	VY86_09550
b3499	B738_03532	Phpb_01322	PTE_02160	plu0374	PAU_00290	Ppb6_00019	VY86_10145
b3500	B738_03542	Phpb_01323	PTE_02159	plu0375	PAU_00291	Ppb6_00018	VY86_10150
b4292	B738_03567	Phpb_04456	PTE_01330	plu4445	PAU_03940	Ppb6_01377	VY86_10165
b4293	B738_03572	Phpb_04457	PTE_01329	plu4444	PAU_03939	Ppb6_01376	VY86_10170
b4216	B738_03577	Phpb_04359	PTE_01328	plu4558	PAU_04059	Ppb6_04312	VY86_10175
b4217	B738_03582	Phpb_04360	PTE_01327	plu4557	PAU_04058	Ppb6_04313	VY86_10180
b4218	B738_03587	Phpb_04361	PTE_01326	plu4556	PAU_04057	Ppb6_04314	VY86_10185
b4219	B738_03592	Phpb_04362	PTE_01325	plu4555	PAU_04056	Ppb6_04315	VY86_10190
b4220	B738_03597	Phpb_04363	PTE_01324	plu4554	PAU_04055	Ppb6_04316	VY86_10195
b4221	B738_03602	Phpb_04364	PTE_01323	plu4553	PAU_04054	Ppb6_04317	VY86_10200
b4222	B738_03607	Phpb_04365	PTE_01322	plu4552	PAU_04053	Ppb6_04318	VY86_10205
b4226	B738_03612	Phpb_04366	PTE_01321	plu4551	PAU_04052	Ppb6_04319	VY86_10210
b4232	B738_03617	Phpb_04369	PTE_01317	plu4550	PAU_04051	Ppb6_04320	VY86_10240
b4233	B738_03622	Phpb_04370	PTE_01316	plu4549	PAU_04050	Ppb6_04321	VY86_10245
b3237	B738_03627	Phpb_04371	PTE_01315	plu4548	PAU_04049	Ppb6_04322	VY86_10250
b3236	B738_03632	Phpb_04372	PTE_01314	plu4547	PAU_04048	Ppb6_04323	VY86_10255
b3188	B738_03637	Phpb_04373	PTE_01313	plu0729,plu4546	PAU_04047	Ppb6_04324	VY86_10260
b2398	B738_03647	Phpb_04375	PTE_01311	plu4544	PAU_04045	Ppb6_04326	VY86_10270
b3187	B738_03652	Phpb_04376	PTE_01310	plu4543	PAU_04044	Ppb6_04327	VY86_10275
b3186	B738_03657	Phpb_04377	PTE_01309	plu4542	PAU_04043	Ppb6_04328	VY86_10280
b3181	B738_03682	Phpb_04381	PTE_01305	plu4538	PAU_04038	Ppb6_04332	VY86_10300
b3180	B738_03687	Phpb_04382	PTE_01304	plu4537	PAU_04037	Ppb6_04333	VY86_10305
b3179	B738_03692	Phpb_04383	PTE_01303	plu4536	PAU_04036	Ppb6_04334	VY86_10310
b3178	B738_03697	Phpb_04384	PTE_01302	plu4535	PAU_04035	Ppb6_04335	VY86_10315
b3177	B738_03702	Phpb_04385	PTE_01301	plu4534	PAU_04034	Ppb6_04336	VY86_10320
b3176	B738_03707	Phpb_04386	PTE_01300	plu4533	PAU_04033	Ppb6_04337	VY86_10325
b3175	B738_03712	Phpb_04387	PTE_01299	plu4532	PAU_04032	Ppb6_04338	VY86_10330
b3169	B738_03722	Phpb_04391	PTE_01294	plu4530	PAU_04030	Ppb6_04342	VY86_10350
b3168	B738_03727	Phpb_04392	PTE_01293	plu4529	PAU_04029	Ppb6_04343	VY86_10355
b3167	B738_03732	Phpb_04393	PTE_01292	plu4528	PAU_04028	Ppb6_04344	VY86_10360
b3165	B738_03747	Phpb_04395	PTE_01289	plu4526	PAU_04026	Ppb6_04346	VY86_10370
b3164	B738_03752	Phpb_04396	PTE_01287	plu4525	PAU_04025	Ppb6_04347	VY86_10375
b3163	B738_03757	Phpb_04397	PTE_01286	plu4524	PAU_04024	Ppb6_04348	VY86_10380
b3162	B738_03762	Phpb_04398	PTE_01285	plu4523	PAU_04023	Ppb6_04349	VY86_10385
b3156	B738_03872	Phpb_04413	PTE_01257	plu4504	PAU_04007	Ppb6_04364	VY86_10515
b3155	B738_03877	Phpb_04414	PTE_01256	plu4503	PAU_04006	Ppb6_04365	VY86_10520
b1112	B738_03882	Phpb_04415	PTE_01255	plu4502	PAU_04005	Ppb6_04366	VY86_10525
b3154	B738_03887	Phpb_04416	PTE_01254	plu4501	PAU_04004	Ppb6_04367	VY86_10530
b4243	B738_03902	Phpb_04417	PTE_01251	plu4498	PAU_04001	Ppb6_04370	VY86_10545
b4244	B738_03907	Phpb_04418	PTE_01250	plu4497	PAU_04000	Ppb6_04371	VY86_10550
b4245	B738_03922	Phpb_04420	PTE_01247	plu4492	PAU_03999	Ppb6_04372	VY86_10565
b4255	B738_14567	Phpb_04423	PTE_01244	plu4489	PAU_03996	Ppb6_04375	VY86_10575
b1920	B738_14582	Phpb_04425	PTE_01241	plu4487	PAU_03993	Ppb6_04378	VY86_10595
b1918	B738_14597	Phpb_04427	PTE_01239	plu4485	PAU_03991	Ppb6_04380	VY86_10605
b4258	B738_14612	Phpb_04429	PTE_01237	plu4483	PAU_03987	Ppb6_04382	VY86_10620
b4260	B738_14617	Phpb_04431	PTE_01235	plu4481	PAU_03985	Ppb6_04384	VY86_10630
b4261	B738_14622	Phpb_04432	PTE_01234	plu4480	PAU_03984	Ppb6_04385	VY86_10635
b0376	B738_14637	Phpb_04434	PTE_01232	plu4478	PAU_03982	Ppb6_04387	VY86_10645
b3421	B738_14767	Phpb_01809	PTE_01192	plu4307	PAU_00438	Ppb6_03363	VY86_10775
b0712	B738_14782	Phpb_01811	PTE_01188	plu4305	PAU_00441	Ppb6_03361	VY86_10795
b0713	B738_14787	Phpb_01812	PTE_01187	plu4304	PAU_00442	Ppb6_03360	VY86_10800
b0356	B738_14807	Phpb_01733	PTE_02479	plu4332	PAU_03905	Ppb6_01336	VY86_10820
b4065	B738_22620	Phpb_04464	PTE_02470	plu4422	PAU_03893	Ppb6_01327	VY86_10875
b3828	B738_22615	Phpb_04465	PTE_02469	plu4421	PAU_03892	Ppb6_01326	VY86_10880
b3831	B738_20323	Phpb_04469	PTE_02465	plu4417	PAU_03888	Ppb6_01322	VY86_10900
b0065	B738_20338	Phpb_04471	PTE_02463	plu4415	PAU_03886	Ppb6_01320	VY86_10910
b3832	B738_20343	Phpb_04472	PTE_02462	plu4414	PAU_03885	Ppb6_01319	VY86_10915
b3834	B738_20358	Phpb_04474	PTE_02460	plu4412	PAU_03883	Ppb6_01317	VY86_10925
b3836	B738_20373	Phpb_04476	PTE_02458	plu4410	PAU_03881	Ppb6_01315	VY86_10935
b3838	B738_20378	Phpb_04477	PTE_02457	plu4409	PAU_03880	Ppb6_01314	VY86_10940
b3839	B738_21368	Phpb_04478	PTE_02456	plu4408	PAU_03879	Ppb6_01313	VY86_10945
b3842	B738_21383	Phpb_04480	PTE_02454	plu4406	PAU_03877	Ppb6_01311	VY86_10955
b3843	B738_21393	Phpb_04481	PTE_02452	plu4405	PAU_03876	Ppb6_01310	VY86_10965
b3844	B738_21398	Phpb_04482	PTE_02451	plu4404	PAU_03875	Ppb6_01309	VY86_10970
b3845	B738_21403	Phpb_04483	PTE_02450	plu4403	PAU_03874	Ppb6_01308	VY86_10975
b3846	B738_21408	Phpb_04484	PTE_02449	plu4402	PAU_03873	Ppb6_01307	VY86_10980
b3847	B738_21413	Phpb_04485	PTE_02448	plu4401	PAU_03872	Ppb6_01306	VY86_10985
b3848	B738_21418	Phpb_04486	PTE_02447	plu4400	PAU_03871	Ppb6_01305	VY86_10990
b3850	B738_21443	Phpb_04488	PTE_02445	plu4398	PAU_03869	Ppb6_01303	VY86_11000
b3438	B738_23853	Phpb_03642	PTE_01636	plu0496	PAU_03868	Ppb6_03603	VY86_11045
b3437	B738_23848	Phpb_03643	PTE_01635	plu0497	PAU_03867	Ppb6_03604	VY86_11050
b4476	B738_23838	Phpb_03644	PTE_01634	plu0498	PAU_03866	Ppb6_03605	VY86_11055
b3570	B738_23798	Phpb_03649	PTE_01630	plu0503	PAU_03861	Ppb6_03609	VY86_11090
b2110	B738_23773	Phpb_03652	PTE_01627	plu0506	PAU_03858	Ppb6_03612	VY86_11105
b0141	B738_23768	Phpb_03653	PTE_01626	plu0507	PAU_03857	Ppb6_03613	VY86_11110
b0686	B738_15681	Phpb_02143	PTE_00849	plu3206	PAU_03011	Ppb6_02864	VY86_11390
b3528	B738_15676	Phpb_02144	PTE_00850	plu3205	PAU_03012	Ppb6_02865	VY86_11395
b0687	B738_15656	Phpb_02453	PTE_04514	plu1406	PAU_02995	Ppb6_02873	VY86_11410
b0688	B738_15651	Phpb_02452	PTE_04515	plu1407	PAU_02994	Ppb6_02874	VY86_11415
b1534	B738_15641	Phpb_02450	PTE_04516	plu1409	PAU_00146	Ppb6_00588	VY86_11425
b0694	B738_15601	Phpb_02444	PTE_04522	plu1416	PAU_02990	Ppb6_02877	VY86_11465
b0695	B738_15596	Phpb_02443	PTE_04523	plu1417	PAU_02989	Ppb6_02878	VY86_11470
b0696	B738_15591	Phpb_02442	PTE_04524	plu1418	PAU_02988	Ppb6_02879	VY86_11475
b0697	B738_15586	Phpb_02441	PTE_04525	plu1419	PAU_02987	Ppb6_02880	VY86_11480
b2214	B738_01504	Phpb_03150	PTE_04290	plu1202	PAU_03251	Ppb6_03193	VY86_11900
b0224	B738_01539	Phpb_03143	PTE_04283	plu1195	PAU_03258	Ppb6_03200	VY86_11935
b0222	B738_01554	Phpb_03141	PTE_04281	plu1193	PAU_03260	Ppb6_03202	VY86_11945
b0221	B738_01559	Phpb_03140	PTE_04280	plu1192	PAU_03261	Ppb6_03203	VY86_11950
b2838	B738_01614	Phpb_03137	PTE_04241	plu1191	PAU_03269	Ppb6_03204	VY86_11955
b2839	B738_01619	Phpb_03136	PTE_04242	plu1190	PAU_03270	Ppb6_03205	VY86_11960
b1799	B738_01624	Phpb_03135	PTE_04243	plu1189	PAU_03271	Ppb6_03206	VY86_11965
b3335	B738_01644	Phpb_03132	PTE_04246	plu1186	PAU_03274	Ppb6_03209	VY86_11995
b2947	B738_01659	Phpb_03130	PTE_04248	plu1184	PAU_03276	Ppb6_03211	VY86_12005
b2948	B738_01664	Phpb_03129	PTE_04249	plu1183	PAU_03277	Ppb6_03212	VY86_12010
b2949	B738_01669	Phpb_03128	PTE_04250	plu1182	PAU_03278	Ppb6_03213	VY86_12015
b2950	B738_01674	Phpb_03127	PTE_04251	plu1181	PAU_03279	Ppb6_03214	VY86_12020
b2951	B738_01679	Phpb_03126	PTE_04252	plu1180	PAU_03280	Ppb6_03215	VY86_12025
b0386	B738_01684	Phpb_03125	PTE_04253	plu1179	PAU_03281	Ppb6_03216	VY86_12030
b2952	B738_11013	Phpb_03124	PTE_04254	plu1178	PAU_03282	Ppb6_03217	VY86_12035
b2954	B738_11018	Phpb_03123	PTE_04255	plu1177	PAU_03283	Ppb6_03218	VY86_12040
b2955	B738_11023	Phpb_03122	PTE_04256	plu1176	PAU_03284	Ppb6_03219	VY86_12045
b1524	B738_11043	Phpb_03119	PTE_04259	plu1172	PAU_03288	Ppb6_03223	VY86_12245
b2959	B738_11048	Phpb_03118	PTE_04260	plu1171	PAU_03289	Ppb6_03224	VY86_12250
b2961	B738_11068	Phpb_03116	PTE_04262	plu1169	PAU_03291	Ppb6_03226	VY86_12265
b2962	B738_11073	Phpb_03115	PTE_04263	plu1168	PAU_03292	Ppb6_03227	VY86_12270
b2963	B738_11078	Phpb_03114	PTE_04264	plu1167	PAU_03293	Ppb6_03228	VY86_12275
b0312	B738_10241	Phpb_03271	PTE_04223	plu0988	PAU_00931	Ppb6_00045	VY86_12515
b2661	B738_10221	Phpb_03267	PTE_04219	plu0984	PAU_00927	Ppb6_00049	VY86_12535
b2245	B738_10211	Phpb_03265	PTE_04217	plu0982	PAU_00925	Ppb6_00051	VY86_12545
b4135	B738_10751	Phpb_03744	PTE_01530	plu4140	PAU_03764	Ppb6_02550	VY86_12790
b4136	B738_10746	Phpb_03745	PTE_01529	plu4139	PAU_03763	Ppb6_02549	VY86_12795
b4138	B738_10741	Phpb_03746	PTE_01528	plu4138	PAU_03762	Ppb6_02548	VY86_12800
b4140	B738_10721	Phpb_03748	PTE_01526	plu4136	PAU_03758	Ppb6_02544	VY86_12810
b4142	B738_10711	Phpb_03749	PTE_01525	plu4135	PAU_03757	Ppb6_02543	VY86_12815
b4144	B738_10686	Phpb_03752	PTE_01522	plu4132	PAU_03755	Ppb6_02540	VY86_12830
b4146	B738_10681	Phpb_03753	PTE_01521	plu4131	PAU_03754	Ppb6_02539	VY86_12835
b4147	B738_10676	Phpb_03754	PTE_01520	plu4130	PAU_03753	Ppb6_02538	VY86_12840
b4151	B738_10666	Phpb_03756	PTE_01517	plu4127	PAU_03751	Ppb6_02536	VY86_12850
b4152	B738_10661	Phpb_03757	PTE_01516	plu4126	PAU_03750	Ppb6_02535	VY86_12855
b4153	B738_10656	Phpb_03758	PTE_01515	plu4125	PAU_03749	Ppb6_02534	VY86_12860
b4154	B738_10651	Phpb_03759	PTE_01514	plu4124	PAU_03748	Ppb6_02533	VY86_12865
b4155	B738_10631	Phpb_03763	PTE_01513	plu4121	PAU_03743	Ppb6_02530	VY86_12875
b2239	B738_10626	Phpb_03764	PTE_01512	plu4120	PAU_03742	Ppb6_02529	VY86_12880
b2240	B738_10621	Phpb_03765	PTE_01511	plu4119	PAU_03741	Ppb6_02528	VY86_12885
b3945	B738_10611	Phpb_03767	PTE_01506	plu4115	PAU_03738	Ppb6_02525	VY86_12895
b3471	B738_10606	Phpb_03773	PTE_01505	plu4110	PAU_03737	Ppb6_02524	VY86_12900
b3470	B738_10601	Phpb_03774	PTE_01504	plu4109	PAU_03736	Ppb6_02523	VY86_12905
b3469	B738_10596	Phpb_03775	PTE_01503	plu4108	PAU_03733	Ppb6_02522	VY86_12915
b3466	B738_10586	Phpb_03777	PTE_01499	plu4106	PAU_03731	Ppb6_02520	VY86_12930
b3465	B738_10581	Phpb_03778	PTE_01498	plu4105	PAU_03730	Ppb6_02519	VY86_12935
b3464	B738_10576	Phpb_03779	PTE_01497	plu4104	PAU_03729	Ppb6_02518	VY86_12940
b3463	B738_10571	Phpb_03780	PTE_01496	plu4103	PAU_03728	Ppb6_02517	VY86_12945
b3462	B738_10566	Phpb_03781	PTE_01495	plu4102	PAU_03727	Ppb6_02516	VY86_12950
b3461	B738_10561	Phpb_03782	PTE_01494	plu4101	PAU_03726	Ppb6_02515	VY86_12955
b3124,b0514	B738_10556	Phpb_03784	PTE_01493	plu4100	PAU_03725	Ppb6_02514	VY86_12960
b3459	B738_10551	Phpb_03785	PTE_01492	plu4099	PAU_03724	Ppb6_02513	VY86_12965
b3457	B738_10541	Phpb_03787	PTE_01490	plu4097	PAU_03722	Ppb6_02511	VY86_12975
b3456	B738_10536	Phpb_03788	PTE_01489	plu4096	PAU_03721	Ppb6_02510	VY86_12980
b3455	B738_10531	Phpb_03789	PTE_01488	plu4095	PAU_03720	Ppb6_02509	VY86_12985
b3261	B738_10496	Phpb_02007	PTE_01481	plu4089	PAU_03714	Ppb6_02503	VY86_13020
b3260	B738_10491	Phpb_02008	PTE_01480	plu4088	PAU_03713	Ppb6_02502	VY86_13025
b3259	B738_10486	Phpb_02009	PTE_01479	plu4087	PAU_03712	Ppb6_02501	VY86_13030
b3258	B738_10481	Phpb_02010	PTE_01478	plu4086	PAU_03711	Ppb6_02500	VY86_13035
b3257	B738_10476	Phpb_02011	PTE_01477	plu4085	PAU_03710	Ppb6_02499	VY86_13040
b3256	B738_05322	Phpb_02019	PTE_00020	plu4075	PAU_03707	Ppb6_02497	VY86_13145
b3255	B738_05327	Phpb_02020	PTE_00021	plu4074	PAU_03706	Ppb6_02496	VY86_13150
b3251	B738_05352	Phpb_02023	PTE_00024	plu4071	PAU_03703	Ppb6_02493	VY86_13165
b3249	B738_05362	Phpb_02025	PTE_00026	plu4069	PAU_03701	Ppb6_02491	VY86_13175
b3248	B738_05367	Phpb_02026	PTE_00027	plu4068	PAU_03700	Ppb6_02490	VY86_13180
b3247	B738_05372	Phpb_02027	PTE_00028	plu4067	PAU_03699	Ppb6_02489	VY86_13185
b0219	B738_05397	Phpb_02029	PTE_00030	plu4065	PAU_03697	Ppb6_02487	VY86_13195
b4234	B738_05412	Phpb_02033	PTE_00032	plu4061	PAU_03693	Ppb6_02483	VY86_13205
b4235	B738_05417	Phpb_02034	PTE_00033	plu4060	PAU_03692	Ppb6_02482	VY86_13210
b0610	B738_05422	Phpb_02035	PTE_00035	plu4046	PAU_03684	Ppb6_02477	VY86_13215
b3206	B738_05427	Phpb_02036	PTE_00036	plu4045	PAU_03683	Ppb6_02476	VY86_13220
b3205	B738_05432	Phpb_02037	PTE_00037	plu4044	PAU_03682	Ppb6_02475	VY86_13225
b3204	B738_05437	Phpb_02038	PTE_00038	plu4043	PAU_03681	Ppb6_02474	VY86_13230
b3203	B738_05442	Phpb_02039	PTE_00039	plu4042	PAU_03680	Ppb6_02473	VY86_13235
b3202	B738_05452	Phpb_02040	PTE_00040	plu4041	PAU_03679	Ppb6_02472	VY86_13240
b3201	B738_05457	Phpb_02041	PTE_00041	plu4040	PAU_03678	Ppb6_02471	VY86_13245
b3200	B738_05462	Phpb_02042	PTE_00042	plu4039	PAU_03677	Ppb6_02470	VY86_13250
b3198	B738_05477	Phpb_02044	PTE_00044	plu4037	PAU_03675	Ppb6_02468	VY86_13260
b3197	B738_05482	Phpb_02045	PTE_00045	plu4036	PAU_03674	Ppb6_02467	VY86_13265
b3196	B738_05487	Phpb_02046	PTE_00046	plu4035	PAU_03673	Ppb6_02466	VY86_13270
b3193	B738_05507	Phpb_02049	PTE_00049	plu4032	PAU_03670	Ppb6_02463	VY86_13285
b3192	B738_05512	Phpb_02050	PTE_00050	plu4031	PAU_03669	Ppb6_02462	VY86_13290
b3190	B738_05527	Phpb_02052	PTE_00052	plu4029	PAU_03666	Ppb6_02460	VY86_13300
b3189	B738_05532	Phpb_02053	PTE_00053	plu4028	PAU_03665	Ppb6_02459	VY86_13305
b3235	B738_05537	Phpb_02229	PTE_00055	plu4022	PAU_03658	Ppb6_02458	VY86_13310
b3234	B738_05547	Phpb_02231	PTE_00058	plu4018	PAU_03656	Ppb6_02457	VY86_13315
b3233	B738_05552	Phpb_02232	PTE_00059	plu4017	PAU_03655	Ppb6_02456	VY86_13320
b3231	B738_05572	Phpb_02234	PTE_00061	plu4015	PAU_03653	Ppb6_02454	VY86_13335
b3230	B738_05577	Phpb_02235	PTE_00062	plu4014	PAU_03652	Ppb6_02453	VY86_13340
b3229	B738_05582	Phpb_02236	PTE_00063	plu4013	PAU_03651	Ppb6_02452	VY86_13345
b3228	B738_05587	Phpb_02237	PTE_00064	plu4012	PAU_03650	Ppb6_02451	VY86_13350
b3213	B738_05597	Phpb_02239	PTE_00066	plu4010	PAU_03648	Ppb6_02447	VY86_13360
b3210	B738_05612	Phpb_02242	PTE_00068	plu4008	PAU_03644	Ppb6_02445	VY86_13370
b3209	B738_05617	Phpb_02243	PTE_00070	plu4007	PAU_03643	Ppb6_02444	VY86_13375
b3208	B738_05622	Phpb_02244	PTE_00071	plu4006	PAU_03642	Ppb6_02443	VY86_13380
b3150	B738_05627	Phpb_02245	PTE_00072	plu4005	PAU_03641	Ppb6_02442	VY86_13385
b3149	B738_05632	Phpb_02246	PTE_00073	plu4004	PAU_03640	Ppb6_02441	VY86_13390
b3148	B738_05637	Phpb_02247	PTE_00074	plu4003	PAU_03639	Ppb6_02440	VY86_13395
b3106	B738_05662	Phpb_02250	PTE_00078	plu3999	PAU_03635	Ppb6_02437	VY86_13410
b3105	B738_05667	Phpb_02251	PTE_00079	plu3998	PAU_03634	Ppb6_02436	VY86_13415
b3101	B738_05672	Phpb_02254	PTE_00080	plu3997	PAU_03633	Ppb6_02435	VY86_13420
b3100	B738_05677	Phpb_02255	PTE_00081	plu3996	PAU_03632	Ppb6_02434	VY86_13425
b3099	B738_05682	Phpb_02256	PTE_00082	plu3995	PAU_03631	Ppb6_02433	VY86_13430
b3098	B738_05687	Phpb_02257	PTE_00083	plu3994	PAU_03630	Ppb6_02432	VY86_13435
b3088	B738_05702	Phpb_02259	PTE_00086	plu3992	PAU_03627	Ppb6_02430	VY86_13445
b3089	B738_05707	Phpb_02260	PTE_00087	plu3991	PAU_03626	Ppb6_02429	VY86_13450
b0877	B738_05727	Phpb_02264	PTE_00091	plu3988	PAU_03623	Ppb6_02426	VY86_13465
b2889	B738_05732	Phpb_02265	PTE_00092	plu3987	PAU_03622	Ppb6_02425	VY86_13470
b3067	B738_05747	Phpb_02301	PTE_00146	plu3979	PAU_03559	Ppb6_02381	VY86_13510
b3065	B738_05762	Phpb_02303	PTE_00148	plu3977	PAU_03557	Ppb6_02379	VY86_13520
b3064	B738_05767	Phpb_02304	PTE_00149	plu3976	PAU_03556	Ppb6_02378	VY86_13525
b3059	B738_05772	Phpb_02305	PTE_00150	plu3975	PAU_03555	Ppb6_02377	VY86_13530
b3058	B738_05777	Phpb_02306	PTE_00151	plu3974	PAU_03554	Ppb6_02376	VY86_13535
b3056	B738_05787	Phpb_02308	PTE_00153	plu3972	PAU_03552	Ppb6_02374	VY86_13545
b3054	B738_05802	Phpb_02310	PTE_00155	plu3970	PAU_03549	Ppb6_02371	VY86_13555
b3053	B738_05807	Phpb_02311	PTE_00156	plu3969	PAU_03548	Ppb6_02370	VY86_13560
b3052	B738_05812	Phpb_02312	PTE_00157	plu3968	PAU_03547	Ppb6_02369	VY86_13565
b3042	B738_09476	Phpb_02316	PTE_00160	plu3964	PAU_03537	Ppb6_02362	VY86_13595
b3041	B738_09481	Phpb_02317	PTE_00163	plu3963	PAU_03536	Ppb6_02361	VY86_13600
b3039	B738_09486	Phpb_02318	PTE_00164	plu3962	PAU_03535	Ppb6_02360	VY86_13605
b3038	B738_09526	Phpb_02319	PTE_00171	plu3957	PAU_03533	Ppb6_02359	VY86_13650
b3037	B738_09531	Phpb_02320	PTE_00172	plu3956	PAU_03532	Ppb6_02358	VY86_13655
b3035	B738_09556	Phpb_02322	PTE_00174	plu3954	PAU_03531	Ppb6_02356	VY86_13680
b3034	B738_09561	Phpb_02323	PTE_00175	plu3953	PAU_03530	Ppb6_02355	VY86_13685
b3032	B738_09566	Phpb_02324	PTE_00176	plu3952	PAU_03529	Ppb6_02354	VY86_13690
b3031	B738_09571	Phpb_02325	PTE_00177	plu3951	PAU_03528	Ppb6_02353	VY86_13695
b3030	B738_09576	Phpb_02326	PTE_00178	plu3950	PAU_03527	Ppb6_02352	VY86_13700
b3019	B738_09581	Phpb_02327	PTE_00179	plu3949	PAU_03526	Ppb6_02351	VY86_13705
b3017	B738_09596	Phpb_02329	PTE_00181	plu3947	PAU_03524	Ppb6_02346	VY86_13715
b3012	B738_09601	Phpb_02330	PTE_00182	plu3946	PAU_03522	Ppb6_02345	VY86_13720
b3009	B738_09606	Phpb_02331	PTE_00183	plu3945	PAU_03521	Ppb6_02344	VY86_13725
b3008	B738_09621	Phpb_02334	PTE_00186	plu3942	PAU_03516	Ppb6_02343	VY86_13745
b3005	B738_09631	Phpb_02336	PTE_00188	plu3940	PAU_03514	Ppb6_02341	VY86_13755
b1007	B738_10081	Phpb_03250	PTE_04202	plu0974	PAU_00909	Ppb6_00065	VY86_13815
b3496	B738_10076	Phpb_03249	PTE_04201	plu0973	PAU_00908	Ppb6_00066	VY86_13820
b0335	B738_13528	Phpb_00563	PTE_00529	plu3539	PAU_01237	Ppb6_01507	VY86_14115
b0334	B738_13533	Phpb_00564	PTE_00528	plu3540	PAU_01236	Ppb6_01508	VY86_14120
b0333	B738_13538	Phpb_00565	PTE_00527	plu3541	PAU_01235	Ppb6_01509	VY86_14125
b0331	B738_13543	Phpb_00566	PTE_00526	plu3542	PAU_01234	Ppb6_01510	VY86_14130
b0330	B738_13548	Phpb_00567	PTE_00525	plu3543	PAU_01233	Ppb6_01511	VY86_14135
b4129,b2890	B738_23483	Phpb_00574	PTE_00518	plu3548	PAU_01226	Ppb6_01518	VY86_14175
b2891	B738_23478	Phpb_00575	PTE_00517	plu3549	PAU_01225	Ppb6_01519	VY86_14180
b2892	B738_23473	Phpb_00576	PTE_00516	plu3550	PAU_01213	Ppb6_01666	VY86_14185
b2893	B738_23468	Phpb_00577	PTE_00515	plu3551	PAU_01212	Ppb6_01665	VY86_14190
b2894	B738_23463	Phpb_00578	PTE_00514	plu3552	PAU_01211	Ppb6_01664	VY86_14195
b2895	B738_23458	Phpb_00579	PTE_00513	plu3553	PAU_01210	Ppb6_01663	VY86_14200
b2896	B738_23453	Phpb_00580	PTE_00512	plu3554	PAU_01209	Ppb6_01662	VY86_14205
b2898	B738_23438	Phpb_00582	PTE_00510	plu3556	PAU_01207	Ppb6_01660	VY86_14215
b0755	B738_19831	Phpb_02398	PTE_04568	plu1471	PAU_02950	Ppb6_02918	VY86_14315
b0754	B738_19826	Phpb_02399	PTE_04567	plu1470	PAU_02951	Ppb6_02917	VY86_14325
b0751	B738_19821	Phpb_02400	PTE_04566	plu1469	PAU_02952	Ppb6_02916	VY86_14330
b0750	B738_19816	Phpb_02401	PTE_04565	plu1468	PAU_02953	Ppb6_02915	VY86_14335
b0742	B738_15346	Phpb_02414	PTE_04561	plu1457	PAU_02957	Ppb6_02910	VY86_14360
b0741	B738_15351	Phpb_02415	PTE_04560	plu1456	PAU_02958	Ppb6_02909	VY86_14365
b0740	B738_15356	Phpb_02416	PTE_04559	plu1455	PAU_02959	Ppb6_02908	VY86_14370
b0738	B738_15376	Phpb_02418	PTE_04557	plu1453	PAU_02961	Ppb6_02906	VY86_14380
b0737	B738_15381	Phpb_02419	PTE_04556	plu1452	PAU_02962	Ppb6_02905	VY86_14385
b0736	B738_15386	Phpb_02420	PTE_04555	plu1451	PAU_02963	Ppb6_02904	VY86_14390
b0734	B738_15411	Phpb_02423	PTE_04550	plu1450	PAU_02966	Ppb6_02901	VY86_14405
b0733	B738_15416	Phpb_02424	PTE_04549	plu1449	PAU_02967	Ppb6_02900	VY86_14410
b0729	B738_15421	Phpb_02427	PTE_04545	plu1433	PAU_02971	Ppb6_02896	VY86_14415
b0727	B738_15436	Phpb_02430	PTE_04543	plu1431	PAU_02973	Ppb6_02894	VY86_14425
b0724	B738_15451	Phpb_02432	PTE_04541	plu1429	PAU_02975	Ppb6_02892	VY86_14435
b0723	B738_15456	Phpb_02433	PTE_04540	plu1428	PAU_02976	Ppb6_02891	VY86_14440
b0721	B738_15471	Phpb_02435	PTE_04538	plu1426	PAU_02978	Ppb6_02889	VY86_14450
b0710	B738_15486	Phpb_02437	PTE_04535	plu1424	PAU_02980	Ppb6_02887	VY86_14460
b2904	B738_08561	Phpb_00610	PTE_00478	plu3597	PAU_01160	Ppb6_01622	VY86_14495
b2905	B738_08556	Phpb_00611	PTE_00477	plu3598	PAU_01159	Ppb6_01621	VY86_14500
b2907	B738_08541	Phpb_00613	PTE_00475	plu3600	PAU_01157	Ppb6_01619	VY86_14510
b2908	B738_08536	Phpb_00614	PTE_00474	plu3601	PAU_01156	Ppb6_01618	VY86_14515
b2909	B738_08531	Phpb_00615	PTE_00473	plu3602	PAU_01155	Ppb6_01617	VY86_14520
b2910	B738_08526	Phpb_00616	PTE_00472	plu3603	PAU_01154	Ppb6_01616	VY86_14525
b2912	B738_08521	Phpb_00617	PTE_00470	plu3604	PAU_01153	Ppb6_01615	VY86_14530
b2913	B738_08516	Phpb_00618	PTE_00469	plu3605	PAU_01152	Ppb6_01614	VY86_14535
b2914	B738_08511	Phpb_00619	PTE_00468	plu3606	PAU_01151	Ppb6_01613	VY86_14540
b2916	B738_08476	Phpb_00622	PTE_00465	plu3610	PAU_01150	Ppb6_01612	VY86_14545
b2922	B738_08471	Phpb_00623	PTE_00464	plu3611	PAU_01149	Ppb6_01611	VY86_14550
b2923	B738_08466	Phpb_00624	PTE_00463	plu3612	PAU_01148	Ppb6_01610	VY86_14555
b0119	B738_08436	Phpb_00627	PTE_00460	plu3616	PAU_01143	Ppb6_01605	VY86_14575
b0118	B738_08431	Phpb_00629	PTE_00458	plu3619	PAU_01141	Ppb6_01602	VY86_14580
b2553	B738_07941	Phpb_02071	PTE_00641	plu3309	PAU_01330	Ppb6_03070	VY86_14615
b2554	B738_07951	Phpb_02069	PTE_00639	plu3311	PAU_01328	Ppb6_03072	VY86_14625
b2555	B738_07956	Phpb_02068	PTE_00638	plu3312	PAU_01327	Ppb6_03073	VY86_14630
b2557	B738_07981	Phpb_02062	PTE_00635	plu3317	PAU_01324	Ppb6_03076	VY86_14720
b2558	B738_07986	Phpb_02061	PTE_00634	plu3318	PAU_01322	Ppb6_03077	VY86_14725
b2944	B738_08061	Phpb_00738	PTE_00400	plu3684	PAU_01086	Ppb6_01540	VY86_14770
b2942	B738_08066	Phpb_00737	PTE_00401	plu3683	PAU_01087	Ppb6_01541	VY86_14775
b2938	B738_08071	Phpb_00736	PTE_00402	plu3681	PAU_01088	Ppb6_01542	VY86_14780
b0071	B738_08116	Phpb_00729	PTE_00409	plu3676	PAU_01094	Ppb6_01554	VY86_14805
b0072	B738_08121	Phpb_00728	PTE_00410	plu3675	PAU_01095	Ppb6_01555	VY86_14810
b0074	B738_08136	Phpb_00726	PTE_00412	plu3673	PAU_01097	Ppb6_01557	VY86_14820
b0076	B738_08141	Phpb_00725	PTE_00414	plu3672	PAU_01098	Ppb6_01558	VY86_14825
b0077	B738_08211	Phpb_00674	PTE_00417	plu3666	PAU_01101	Ppb6_01561	VY86_14870
b0080	B738_08231	Phpb_00672	PTE_00419	plu3664	PAU_01103	Ppb6_01563	VY86_14880
b0081	B738_08236	Phpb_00671	PTE_00420	plu3663	PAU_01104	Ppb6_01564	VY86_14885
b0082	B738_08241	Phpb_00670	PTE_00421	plu3662	PAU_01105	Ppb6_01565	VY86_14890
b0083	B738_08246	Phpb_00669	PTE_00422	plu3661	PAU_01106	Ppb6_01566	VY86_14895
b0084	B738_08251	Phpb_00668	PTE_00423	plu3660	PAU_01107	Ppb6_01567	VY86_14900
b0085	B738_08256	Phpb_00667	PTE_00424	plu3659	PAU_01108	Ppb6_01568	VY86_14905
b0087	B738_08271	Phpb_00665	PTE_00426	plu3657	PAU_01110	Ppb6_01570	VY86_14915
b0088	B738_08281	Phpb_00664	PTE_00427	plu3656	PAU_01111	Ppb6_01571	VY86_14920
b0089	B738_08286	Phpb_00663	PTE_00428	plu3655	PAU_01112	Ppb6_01572	VY86_14925
b0090	B738_08291	Phpb_00662	PTE_00429	plu3654	PAU_01113	Ppb6_01573	VY86_14930
b0091	B738_08301	Phpb_00661	PTE_00430	plu3653	PAU_01114	Ppb6_01574	VY86_14935
b0092	B738_08306	Phpb_00660	PTE_00431	plu3652	PAU_01115	Ppb6_01575	VY86_14940
b0093	B738_08311	Phpb_00659	PTE_00432	plu3651	PAU_01116	Ppb6_01576	VY86_14945
b0094	B738_08316	Phpb_00658	PTE_00433	plu3650	PAU_01117	Ppb6_01577	VY86_14950
b0095	B738_08321	Phpb_00657	PTE_00434	plu3649	PAU_01118	Ppb6_01578	VY86_14955
b0097	B738_08336	Phpb_00654	PTE_00437	plu3646	PAU_01121	Ppb6_01581	VY86_14970
b0098	B738_08341	Phpb_00653	PTE_00438	plu3645	PAU_01122	Ppb6_01582	VY86_14975
b0099	B738_08346	Phpb_00652	PTE_00439	plu3644	PAU_01123	Ppb6_01584	VY86_14980
b0101	B738_08351	Phpb_00651	PTE_00440	plu3643	PAU_01124	Ppb6_01585	VY86_14985
b0102	B738_08356	Phpb_00650	PTE_00441	plu3642	PAU_01125	Ppb6_01586	VY86_14990
b0103	B738_08361	Phpb_00649	PTE_00442	plu3641	PAU_01126	Ppb6_01587	VY86_14995
b0106	B738_08366	Phpb_00648	PTE_00443	plu3640	PAU_01127	Ppb6_01588	VY86_15000
b0107	B738_08371	Phpb_00647	PTE_00444	plu3639	PAU_01128	Ppb6_01589	VY86_15005
b0108	B738_08376	Phpb_00646	PTE_00445	plu3638	PAU_01129	Ppb6_01590	VY86_15010
b0109	B738_08381	Phpb_00645	PTE_00446	plu3637	PAU_01130	Ppb6_01591	VY86_15015
b0111	B738_08386	Phpb_00643	PTE_00447	plu3636	PAU_01131	Ppb6_01593	VY86_15020
b0113	B738_08411	Phpb_00633	PTE_00453	plu3624	PAU_01137	Ppb6_01598	VY86_15045
b0114	B738_08416	Phpb_00632	PTE_00455	plu3623	PAU_01138	Ppb6_01599	VY86_15050
b0115	B738_08421	Phpb_00631	PTE_00456	plu3622	PAU_01139	Ppb6_01600	VY86_15055
b0116	B738_08426	Phpb_00630	PTE_00457	plu3621	PAU_01140	Ppb6_01601	VY86_15060
b0699	B738_15491	Phpb_02438	PTE_04534	plu1423	PAU_02981	Ppb6_02886	VY86_15070
b0760	B738_19861	Phpb_02393	PTE_04572	plu1473	PAU_02948	Ppb6_02920	VY86_15115
b0763	B738_19876	Phpb_02390	PTE_04575	plu1476	PAU_02946	Ppb6_02923	VY86_15130
b0765	B738_19881	Phpb_02388	PTE_04577	plu1478	PAU_02944	Ppb6_02925	VY86_15140
b0766	B738_19886	Phpb_02387	PTE_04578	plu1479	PAU_02943	Ppb6_02926	VY86_15145
b0767	B738_19891	Phpb_02386	PTE_04579	plu1480	PAU_02942	Ppb6_02927	VY86_15150
b0775	B738_19931	Phpb_02383	PTE_04584	plu1485	PAU_02940	Ppb6_02929	VY86_15165
b0776	B738_19936	Phpb_02382	PTE_04585	plu1486	PAU_02939	Ppb6_02930	VY86_15170
b0778	B738_19951	Phpb_02380	PTE_04587	plu1488	PAU_02937	Ppb6_02932	VY86_15180
b0779	B738_19976	Phpb_02377	PTE_04592	plu1491	PAU_02936	Ppb6_02933	VY86_15200
b0780	B738_19981	Phpb_02371	PTE_04593	plu1498	PAU_02935	Ppb6_02934	VY86_15205
b0781	B738_19986	Phpb_02370	PTE_04595	plu1499	PAU_02934	Ppb6_02935	VY86_15210
b0783	B738_19991	Phpb_02369	PTE_04596	plu1500	PAU_02933	Ppb6_02936	VY86_15215
b0784	B738_19996	Phpb_02368	PTE_04597	plu1501	PAU_02932	Ppb6_02945	VY86_15220
b0785	B738_20001	Phpb_02367	PTE_04598	plu1502	PAU_02931	Ppb6_02946	VY86_15225
b0786	B738_20006	Phpb_02366	PTE_04599	plu1503	PAU_02930	Ppb6_02947	VY86_15230
b0792	B738_20021	Phpb_02362	PTE_04602	plu1506	PAU_02927	Ppb6_02948	VY86_15235
b0793	B738_20026	Phpb_02361	PTE_04603	plu1507	PAU_02926	Ppb6_02949	VY86_15240
b0794	B738_20031	Phpb_02360	PTE_04604	plu1508	PAU_02925	Ppb6_02950	VY86_15245
b0795	B738_20036	Phpb_02359	PTE_04606	plu1509	PAU_02924	Ppb6_02951	VY86_15250
b0797	B738_20056	Phpb_02357	PTE_04608	plu1511	PAU_02922	Ppb6_02954	VY86_15265
b2140	B738_20061	Phpb_02356	PTE_04609	plu1512	PAU_02921	Ppb6_02955	VY86_15270
b2521	B738_20408	Phpb_02351	PTE_04613	plu1522	PAU_02916	Ppb6_02960	VY86_15290
b0799	B738_20418	Phpb_02349	PTE_04615	plu1524	PAU_02915	Ppb6_02962	VY86_15300
b4108	B738_20423	Phpb_03359	PTE_04616	plu1533	PAU_02914	Ppb6_02963	VY86_15305
b0812	B738_20428	Phpb_03358	PTE_04617	plu1534	PAU_02913	Ppb6_02964	VY86_15310
b0813	B738_20433	Phpb_03357	PTE_04618	plu1535	PAU_02912	Ppb6_02965	VY86_15315
b0820	B738_20468	Phpb_03352	PTE_04624	plu1538	PAU_02904	Ppb6_02971	VY86_15345
b0826	B738_20473	Phpb_03351	PTE_04625	plu1539	PAU_02903	Ppb6_02972	VY86_15350
b0827	B738_20478	Phpb_03350	PTE_04626	plu1540	PAU_02902	Ppb6_02973	VY86_15355
b2153	B738_20498	Phpb_03347	PTE_04630	plu1543	PAU_02899	Ppb6_02976	VY86_15380
b2144	B738_20513	Phpb_03345	PTE_04632	plu1545	PAU_02897	Ppb6_02978	VY86_15390
b1479	B738_20528	Phpb_03344	PTE_04634	plu1546	PAU_02896	Ppb6_02979	VY86_15400
b2143	B738_20533	Phpb_03343	PTE_04635	plu1547	PAU_02895	Ppb6_02980	VY86_15405
b2142	B738_20538	Phpb_03342	PTE_04636	plu1548	PAU_02894	Ppb6_02981	VY86_15410
b2141	B738_20543	Phpb_03341	PTE_04637	plu1549	PAU_02893	Ppb6_02982	VY86_15415
b2113	B738_25170	Phpb_03339	PTE_04639	plu1555	PAU_02891	Ppb6_02987	VY86_15425
b2066	B738_25165	Phpb_03338	PTE_04640	plu1556	PAU_02890	Ppb6_02988	VY86_15430
b2065	B738_25160	Phpb_03337	PTE_04641	plu1557	PAU_02889	Ppb6_02989	VY86_15435
b2063	B738_24487	Phpb_04491	PTE_04643	plu1559	PAU_02886	Ppb6_02991	VY86_15445
b2029	B738_24492	Phpb_04492	PTE_04644	plu1560	PAU_02885	Ppb6_02992	VY86_15450
b1787	B738_24507	Phpb_04495	PTE_04647	plu1562	PAU_02882	Ppb6_02995	VY86_15470
b3589	B738_24512	Phpb_04496	PTE_04648	plu1563	PAU_02881	Ppb6_02996	VY86_15475
b2026	B738_24517	Phpb_02880	PTE_04650	plu1564	PAU_02880	Ppb6_02997	VY86_15485
b2025	B738_24522	Phpb_02879	PTE_04651	plu1565	PAU_02879	Ppb6_02998	VY86_15490
b2024	B738_24527	Phpb_02878	PTE_04652	plu1566	PAU_02878	Ppb6_02999	VY86_15495
b2023	B738_24532	Phpb_02877	PTE_04653	plu1567	PAU_02877	Ppb6_03000	VY86_15500
b2022	B738_24537	Phpb_02876	PTE_04654	plu1568	PAU_02876	Ppb6_03001	VY86_15505
b2021	B738_16693	Phpb_02875	PTE_04655	plu1443	PAU_02875	Ppb6_03002	VY86_15510
b2019	B738_16678	Phpb_02873	PTE_04657	plu1570	PAU_02873	Ppb6_03004	VY86_15520
b2016	B738_16668	Phpb_02872	PTE_04659	plu1571	PAU_02872	Ppb6_03005	VY86_15525
b0838	B738_16663	Phpb_02871	PTE_04660	plu1572	PAU_02871	Ppb6_03006	VY86_15530
b0839	B738_16658	Phpb_02870	PTE_04661	plu1573	PAU_02870	Ppb6_03007	VY86_15535
b0849	B738_16618	Phpb_02863	PTE_04670	plu1581	PAU_02864	Ppb6_03012	VY86_15570
b0850	B738_16613	Phpb_02862	PTE_04671	plu1582	PAU_02863	Ppb6_03013	VY86_15575
b0853	B738_16608	Phpb_02861	PTE_04672	plu1583	PAU_02862	Ppb6_03014	VY86_15580
b0859	B738_16603	Phpb_02860	PTE_04673	plu1584	PAU_02861	Ppb6_03015	VY86_15585
b0861	B738_16598	Phpb_02859	PTE_04674	plu1585	PAU_02860	Ppb6_03016	VY86_15590
b0862	B738_16593	Phpb_02858	PTE_04675	plu1586	PAU_02859	Ppb6_03017	VY86_15595
b0863	B738_16588	Phpb_02857	PTE_04676	plu1587	PAU_02858	Ppb6_03018	VY86_15600
b0864	B738_16583	Phpb_02856	PTE_04677	plu1588	PAU_02857	Ppb6_03019	VY86_15605
b0874	B738_16578	Phpb_02855	PTE_04678	plu1589	PAU_02856	Ppb6_03020	VY86_15610
b0878	B738_16573	Phpb_02854	PTE_04680	plu1590	PAU_02855	Ppb6_03021	VY86_15615
b0879	B738_16568	Phpb_02853	PTE_04681	plu1591	PAU_02854	Ppb6_03022	VY86_15620
b0880	B738_16563	Phpb_02852	PTE_04682	plu1592	PAU_02853	Ppb6_03023	VY86_15625
b0881	B738_16558	Phpb_02851	PTE_04683	plu1593	PAU_02852	Ppb6_03024	VY86_15630
b0882	B738_16553	Phpb_02850	PTE_04684	plu1594	PAU_02851	Ppb6_03025	VY86_15635
b0884	B738_16548	Phpb_02849	PTE_04685	plu1595	PAU_02850	Ppb6_03026	VY86_15640
b0885	B738_16543	Phpb_02848	PTE_04686	plu1596	PAU_02849	Ppb6_03027	VY86_15645
b0886	B738_16538	Phpb_02847	PTE_04687	plu1597	PAU_02848	Ppb6_03028	VY86_15650
b0887	B738_16533	Phpb_02846	PTE_04688	plu1598	PAU_02847	Ppb6_03029	VY86_15655
b0888	B738_16528	Phpb_02845	PTE_04689	plu1599	PAU_02846	Ppb6_03030	VY86_15660
b0889	B738_16523	Phpb_02843	PTE_04690	plu1600	PAU_02845	Ppb6_03031	VY86_15665
b0891	B738_16513	Phpb_02841	PTE_04692	plu1602	PAU_02843	Ppb6_03033	VY86_15675
b0892	B738_16508	Phpb_02840	PTE_04693	plu1603	PAU_02842	Ppb6_03034	VY86_15680
b0893	B738_16503	Phpb_02839	PTE_04694	plu1604	PAU_02841	Ppb6_03035	VY86_15685
b0902	B738_16463	Phpb_02828	PTE_03246	plu1612	PAU_02838	Ppb6_03044	VY86_15740
b0903	B738_16453	Phpb_02827	PTE_03247	plu1613	PAU_02837	Ppb6_03045	VY86_15745
b0904	B738_16448	Phpb_02826	PTE_03248	plu1614	PAU_02836	Ppb6_03046	VY86_15750
b2957	B738_16438	Phpb_02824	PTE_03250	plu1616	PAU_02834	Ppb6_03048	VY86_15760
b0907	B738_16418	Phpb_02821	PTE_03251	plu1619	PAU_02831	Ppb6_03050	VY86_15775
b0908	B738_16413	Phpb_02820	PTE_03252	plu1620	PAU_02830	Ppb6_03051	VY86_15780
b0910	B738_16408	Phpb_02819	PTE_03253	plu1621	PAU_02829	Ppb6_03052	VY86_15785
b0912	B738_16393	Phpb_02817	PTE_03255	plu1623	PAU_02827	Ppb6_03054	VY86_15795
b0913	B738_16378	Phpb_02808	PTE_03260	plu1629	PAU_02820	Ppb6_03061	VY86_15820
b0915	B738_16363	Phpb_02806	PTE_03262	plu1631	PAU_02818	Ppb6_01722	VY86_15830
b0917	B738_16353	Phpb_02804	PTE_03264	plu1633	PAU_02817	Ppb6_01724	VY86_15840
b0918	B738_16348	Phpb_02803	PTE_03265	plu1634	PAU_02816	Ppb6_01725	VY86_15845
b0920	B738_16343	Phpb_02802	PTE_03266	plu1635	PAU_02815	Ppb6_01726	VY86_15850
b0921	B738_16338	Phpb_02801	PTE_03267	plu1636	PAU_02814	Ppb6_01727	VY86_15855
b0923	B738_16323	Phpb_02799	PTE_03269	plu1638	PAU_02812	Ppb6_01729	VY86_15865
b0924	B738_16318	Phpb_02798	PTE_03270	plu1639	PAU_02811	Ppb6_01730	VY86_15870
b2972	B738_16211	Phpb_02711	PTE_03364	plu1733	PAU_02785	Ppb6_01381	VY86_16110
b2296	B738_20193	Phpb_01492	PTE_00884	plu3095	PAU_01513	Ppb6_01706	VY86_16180
b2292	B738_20183	Phpb_01494	PTE_00886	plu3093	PAU_01515	Ppb6_01704	VY86_16190
b2291	B738_20178	Phpb_01495	PTE_00887	plu3092	PAU_01516	Ppb6_01703	VY86_16195
b2290	B738_20173	Phpb_01496	PTE_00888	plu3091	PAU_01517	Ppb6_01702	VY86_16200
b2289	B738_20168	Phpb_01497	PTE_00889	plu3090	PAU_01518	Ppb6_01701	VY86_16205
b2288	B738_20163	Phpb_01498	PTE_00890	plu3089	PAU_01520	Ppb6_01700	VY86_16210
b2287	B738_20158	Phpb_01499	PTE_00891	plu3088	PAU_01521	Ppb6_01699	VY86_16215
b2286	B738_20153	Phpb_01500	PTE_00892	plu3087	PAU_01522	Ppb6_01698	VY86_16220
b2285	B738_20148	Phpb_01501	PTE_00893	plu3086	PAU_01523	Ppb6_01697	VY86_16225
b2282	B738_20133	Phpb_01504	PTE_00897	plu3083	PAU_01526	Ppb6_01694	VY86_16240
b2281	B738_20128	Phpb_01505	PTE_00898	plu3082	PAU_01527	Ppb6_01693	VY86_16245
b2280	B738_20123	Phpb_01506	PTE_00899	plu3081	PAU_01528	Ppb6_01692	VY86_16250
b2279	B738_20118	Phpb_01507	PTE_00900	plu3080	PAU_01529	Ppb6_01691	VY86_16255
b2264	B738_17128	Phpb_01516	PTE_03241	plu3073	PAU_01538	Ppb6_01685	VY86_16295
b2261	B738_17108	Phpb_01519	PTE_03238	plu3070	PAU_01541	Ppb6_01682	VY86_16310
b2260	B738_17103	Phpb_01520	PTE_03237	plu3069	PAU_01542	Ppb6_01681	VY86_16315
b2236	B738_16998	Phpb_01536	PTE_03221	plu3054	PAU_01554	Ppb6_00947	VY86_16410
b2235	B738_16993	Phpb_01537	PTE_03220	plu3053	PAU_01555	Ppb6_00946	VY86_16415
b2232	B738_16978	Phpb_01539	PTE_03218	plu3051	PAU_01557	Ppb6_00944	VY86_16425
b1591	B738_11720	Phpb_00155	PTE_03170	plu3000	PAU_01599	Ppb6_01961	VY86_16685
b1993	B738_11825	Phpb_00141	PTE_03151	plu2986	PAU_01614	Ppb6_01975	VY86_16775
b1992	B738_11830	Phpb_00140	PTE_03150	plu2985	PAU_01615	Ppb6_01976	VY86_16780
b2440	B738_11900	Phpb_00132	PTE_03139	plu2971	PAU_01631	Ppb6_01991	VY86_16830
b2451	B738_11915	Phpb_00130	PTE_03137	plu2969	PAU_01633	Ppb6_01993	VY86_16840
b2188	B738_12015	Phpb_00111	PTE_03595	plu2872	PAU_01662	Ppb6_02018	VY86_16915
b2187	B738_12020	Phpb_00110	PTE_03596	plu2871	PAU_01663	Ppb6_02019	VY86_16920
b2186	B738_12025	Phpb_00109	PTE_03597	plu2870	PAU_01664	Ppb6_02020	VY86_16925
b2185	B738_12030	Phpb_00108	PTE_03598	plu2869	PAU_01665	Ppb6_02021	VY86_16930
b2184	B738_12035	Phpb_00107	PTE_03599	plu2868	PAU_01666	Ppb6_02022	VY86_16935
b2183	B738_12040	Phpb_00106	PTE_03600	plu2867	PAU_01668	Ppb6_02023	VY86_16940
b2182	B738_12045	Phpb_00105	PTE_03601	plu2866	PAU_01669	Ppb6_02024	VY86_16945
b2181	B738_12050	Phpb_00104	PTE_03602	plu2865	PAU_01671	Ppb6_02026	VY86_16950
b2175	B738_12055	Phpb_00103	PTE_03603	plu2864	PAU_01672	Ppb6_02027	VY86_16955
b2171	B738_12065	Phpb_00100	PTE_03607	plu2861	PAU_01675	Ppb6_02030	VY86_16970
b2051	B738_12080	Phpb_00098	PTE_03609	plu2859	PAU_01677	Ppb6_02032	VY86_16980
b2159	B738_12095	Phpb_00096	PTE_03611	plu2857	PAU_01679	Ppb6_02034	VY86_16990
b2158	B738_12100	Phpb_00095	PTE_03612	plu2856	PAU_01680	Ppb6_02035	VY86_16995
b2157	B738_12105	Phpb_00094	PTE_03613	plu2855	PAU_01681	Ppb6_02036	VY86_17000
b2156	B738_12110	Phpb_00093	PTE_03614	plu2854	PAU_01682	Ppb6_02037	VY86_17005
b2155	B738_12135	Phpb_00089	PTE_03618	plu2850	PAU_01687	Ppb6_02041	VY86_17025
b2014,b1296	B738_12140	Phpb_00087	PTE_03620	plu2849	PAU_01688	Ppb6_02043	VY86_17030
b2133	B738_12145	Phpb_00086	PTE_03621	plu2848	PAU_01690	Ppb6_02044	VY86_17035
b2011	B738_12150	Phpb_00085	PTE_03622	plu2847	PAU_01691	Ppb6_02045	VY86_17040
b1087	B738_12579	Phpb_03820	PTE_03631	plu2839	PAU_01698	Ppb6_02055	VY86_17115
b1088	B738_12574	Phpb_03819	PTE_03632	plu2838	PAU_01699	Ppb6_02056	VY86_17120
b1089	B738_12569	Phpb_03818	PTE_03633	plu2837	PAU_01700	Ppb6_02057	VY86_17125
b1090	B738_12564	Phpb_03817	PTE_03634	plu2836	PAU_01701	Ppb6_02058	VY86_17130
b1091	B738_12559	Phpb_03816	PTE_03635	plu2835	PAU_01702	Ppb6_02059	VY86_17135
b1092	B738_12554	Phpb_03815	PTE_03636	plu2834	PAU_01703	Ppb6_02060	VY86_17140
b1093	B738_12549	Phpb_03814	PTE_03637	plu2833	PAU_01704	Ppb6_02061	VY86_17145
b1094	B738_12544	Phpb_03813	PTE_03638	plu2832	PAU_01705	Ppb6_02062	VY86_17150
b1095	B738_12539	Phpb_03812	PTE_03639	plu2831	PAU_01706	Ppb6_02063	VY86_17155
b1096	B738_12534	Phpb_03811	PTE_03640	plu2830	PAU_01707	Ppb6_02064	VY86_17160
b1097	B738_12529	Phpb_03810	PTE_03641	plu2829	PAU_01708	Ppb6_02065	VY86_17165
b1098	B738_12524	Phpb_03809	PTE_03642	plu2828	PAU_01709	Ppb6_02066	VY86_17170
b1099	B738_12519	Phpb_03808	PTE_03643	plu2827	PAU_01710	Ppb6_02067	VY86_17175
b1100	B738_12514	Phpb_03807	PTE_03644	plu2826	PAU_01711	Ppb6_02068	VY86_17180
b1103	B738_12509	Phpb_03806	PTE_03645	plu2825	PAU_01712	Ppb6_02069	VY86_17185
b1105	B738_12504	Phpb_03805	PTE_03646	plu2824	PAU_01713	Ppb6_02070	VY86_17190
b1106	B738_12499	Phpb_03804	PTE_03647	plu2823	PAU_01714	Ppb6_02071	VY86_17195
b1107	B738_12494	Phpb_03803	PTE_03648	plu2822	PAU_01716	Ppb6_02072	VY86_17200
b1109	B738_12484	Phpb_03801	PTE_03649	plu2821	PAU_01717	Ppb6_02073	VY86_17205
b1114	B738_12444	Phpb_03369	PTE_03654	plu2815	PAU_01723	Ppb6_02078	VY86_17230
b1117	B738_12429	Phpb_03371	PTE_03656	plu2813	PAU_01727	Ppb6_02081	VY86_17240
b1120	B738_12414	Phpb_03373	PTE_03658	plu2811	PAU_01729	Ppb6_02083	VY86_17250
b1128	B738_12399	Phpb_03375	PTE_03660	plu2809	PAU_01732	Ppb6_02085	VY86_17260
b1130	B738_12389	Phpb_03377	PTE_03662	plu2807	PAU_01734	Ppb6_02087	VY86_17270
b1131	B738_19541	Phpb_03378	PTE_03666	plu2806	PAU_01735	Ppb6_02088	VY86_17290
b1132	B738_19546	Phpb_03379	PTE_03667	plu2805	PAU_01736	Ppb6_02089	VY86_17295
b1134	B738_19561	Phpb_03381	PTE_03669	plu2803	PAU_01738	Ppb6_02091	VY86_17305
b1135	B738_19566	Phpb_03382	PTE_03670	plu2802	PAU_01739	Ppb6_02092	VY86_17310
b1136	B738_19571	Phpb_03383	PTE_03671	plu2801	PAU_01740	Ppb6_02093	VY86_17315
b0007	B738_19581	Phpb_03389	PTE_03675	plu2791	PAU_01744	Ppb6_02095	VY86_17330
b0867	B738_19586	Phpb_03390	PTE_03676	plu2790	PAU_01745	Ppb6_02096	VY86_17335
b0622	B738_19636	Phpb_03394	PTE_03685	plu2784	PAU_01754	Ppb6_02103	VY86_17375
b2103	B738_19646	Phpb_03397	PTE_03689	plu2782	PAU_01757	Ppb6_02105	VY86_17385
b2097	B738_19651	Phpb_03398	PTE_03690	plu2781	PAU_01758	Ppb6_02106	VY86_17390
b2081	B738_19666	Phpb_03399	PTE_03692	plu2780	PAU_01762	Ppb6_02109	VY86_17410
b2080	B738_19671	Phpb_03400	PTE_03693	plu2779	PAU_01763	Ppb6_02110	VY86_17415
b2079	B738_19676	Phpb_03401	PTE_03694	plu2778	PAU_01764	Ppb6_02111	VY86_17420
b2078	B738_19681	Phpb_03402	PTE_03695	plu2777	PAU_01765	Ppb6_02112	VY86_17425
b2075	B738_19701	Phpb_03404	PTE_03697	plu2775	PAU_01767	Ppb6_02114	VY86_17435
b2074	B738_19706	Phpb_03405	PTE_03698	plu2774	PAU_01768	Ppb6_02115	VY86_17440
b2163	B738_19726	Phpb_03408	PTE_03701	plu2771	PAU_01774	Ppb6_02118	VY86_17455
b2502	B738_19731	Phpb_03415	PTE_03709	plu2764	PAU_01776	Ppb6_02119	VY86_17460
b2501	B738_19736	Phpb_03416	PTE_03710	plu2763	PAU_01777	Ppb6_02120	VY86_17465
b1584	B738_19741	Phpb_03417	PTE_03711	plu2762	PAU_01778	Ppb6_02121	VY86_17470
b2500	B738_19746	Phpb_03418	PTE_03712	plu2761	PAU_01779	Ppb6_02122	VY86_17475
b2499	B738_19751	Phpb_03419	PTE_03713	plu2760	PAU_01780	Ppb6_02123	VY86_17480
b2498	B738_19756	Phpb_03420	PTE_03714	plu2759	PAU_01781	Ppb6_02124	VY86_17485
b1734	B738_19776	Phpb_03425	PTE_03718	plu2757	PAU_01785	Ppb6_02128	VY86_17505
b1738	B738_19791	Phpb_03428	PTE_03721	plu2754	PAU_01788	Ppb6_02131	VY86_17520
b2495	B738_11650	Phpb_03430	PTE_03723	plu2751	PAU_01790	Ppb6_02134	VY86_17535
b2494	B738_11645	Phpb_03431	PTE_03724	plu2750	PAU_01791	Ppb6_02135	VY86_17540
b2493	B738_11640	Phpb_03432	PTE_03725	plu2749	PAU_01792	Ppb6_02136	VY86_17545
b2480	B738_11635	Phpb_03433	PTE_03726	plu2748	PAU_01793	Ppb6_02137	VY86_17550
b2479	B738_11630	Phpb_03434	PTE_03727	plu2747	PAU_01794	Ppb6_02138	VY86_17555
b2478	B738_11625	Phpb_03435	PTE_03728	plu2746	PAU_01796	Ppb6_02139	VY86_17560
b2477	B738_11620	Phpb_03436	PTE_03729	plu2745	PAU_01797	Ppb6_02140	VY86_17565
b2476	B738_11600	Phpb_03438	PTE_03732	plu2744	PAU_01798	Ppb6_02141	VY86_17580
b1789	B738_11410	Phpb_03456	PTE_03746	plu2726	PAU_01813	Ppb6_02150	VY86_17895
b2474	B738_11405	Phpb_03457	PTE_03747	plu2725	PAU_01814	Ppb6_02151	VY86_17900
b4547	B738_11400	Phpb_03458	PTE_03748	plu2724	PAU_01815	Ppb6_02152	VY86_17905
b2472	B738_11390	Phpb_03460	PTE_03750	plu2722	PAU_01817	Ppb6_02154	VY86_17915
b2471	B738_11385	Phpb_03461	PTE_03751	plu2721	PAU_01818	Ppb6_02155	VY86_17920
b2193	B738_11380	Phpb_03462	PTE_03752	plu2720	PAU_01819	Ppb6_02156	VY86_17925
b2509	B738_11330	Phpb_03468	PTE_03758	plu2714	PAU_01825	Ppb6_02162	VY86_17955
b2507	B738_11315	Phpb_03470	PTE_03760	plu2712	PAU_01827	Ppb6_02164	VY86_17965
b1822	B738_11260	Phpb_03476	PTE_03766	plu2702	PAU_01832	Ppb6_02172	VY86_17995
b1821	B738_11255	Phpb_03477	PTE_03767	plu2701	PAU_01833	Ppb6_02173	VY86_18000
b1820	B738_11250	Phpb_03478	PTE_03768	plu2700	PAU_01834	Ppb6_02174	VY86_18005
b1819	B738_10056	Phpb_03479	PTE_03769	plu2699	PAU_01835	Ppb6_02175	VY86_18010
b1817	B738_10041	Phpb_03481	PTE_03771	plu2697	PAU_01837	Ppb6_02177	VY86_18020
b1814	B738_10036	Phpb_03482	PTE_03773	plu2696	PAU_01839	Ppb6_02178	VY86_18025
b1813	B738_10031	Phpb_03483	PTE_03774	plu2695	PAU_01840	Ppb6_02179	VY86_18030
b1811	B738_10016	Phpb_03485	PTE_03776	plu2693	PAU_01842	Ppb6_02181	VY86_18040
b1847	B738_10011	Phpb_03486	PTE_03777	plu2692	PAU_01843	Ppb6_02182	VY86_18045
b1842	B738_10001	Phpb_03488	PTE_03779	plu2690	PAU_01845	Ppb6_02184	VY86_18055
b1905	B738_09996	Phpb_03489	PTE_03780	plu2689	PAU_01847	Ppb6_01422	VY86_18060
b1841	B738_09991	Phpb_03490	PTE_03781	plu2688	PAU_01848	Ppb6_01423	VY86_18065
b1840	B738_09986	Phpb_03491	PTE_03782	plu2687	PAU_01849	Ppb6_01424	VY86_18070
b1839	B738_09981	Phpb_03492	PTE_03783	plu2686	PAU_01850	Ppb6_01425	VY86_18075
b1836	B738_09976	Phpb_03493	PTE_03785	plu2685	PAU_01851	Ppb6_01426	VY86_18080
b1832	B738_09971	Phpb_03494	PTE_03786	plu2684	PAU_01852	Ppb6_01427	VY86_18085
b1830	B738_09956	Phpb_03496	PTE_03788	plu2682	PAU_01854	Ppb6_01429	VY86_18095
b1829	B738_09951	Phpb_03497	PTE_03789	plu2681	PAU_01855	Ppb6_01430	VY86_18100
b1729	B738_09946	Phpb_03498	PTE_03790	plu2680	PAU_01856	Ppb6_01431	VY86_18105
b1728	B738_09941	Phpb_03499	PTE_03791	plu2679	PAU_01857	Ppb6_01432	VY86_18110
b1726	B738_09931	Phpb_03500	PTE_03793	plu2677	PAU_01859	Ppb6_01433	VY86_18120
b1725	B738_09926	Phpb_03501	PTE_03794	plu2676	PAU_01860	Ppb6_01434	VY86_18125
b1193	B738_09901	Phpb_03506	PTE_03799	plu2671	PAU_01865	Ppb6_01439	VY86_18150
b1718	B738_01699	Phpb_03511	PTE_03801	plu2668	PAU_01867	Ppb6_01444	VY86_18160
b1716	B738_01704	Phpb_03513	PTE_03804	plu2666	PAU_01869	Ppb6_01446	VY86_18170
b1714	B738_01709	Phpb_03514	PTE_03806	plu2665	PAU_01870	Ppb6_01447	VY86_18175
b1712	B738_01724	Phpb_03516	PTE_03808	plu2663	PAU_01872	Ppb6_01449	VY86_18185
b1711	B738_01729	Phpb_03517	PTE_03809	plu2662	PAU_01873	Ppb6_01450	VY86_18190
b2253	B738_01739	Phpb_03519	PTE_03811	plu2660	PAU_01875	Ppb6_01452	VY86_18200
b2254	B738_01744	Phpb_03520	PTE_03812	plu2659	PAU_01876	Ppb6_01453	VY86_18205
b2255	B738_01749	Phpb_03521	PTE_03813	plu2658	PAU_01877	Ppb6_01454	VY86_18210
b2256	B738_01754	Phpb_03522	PTE_03814	plu2657	PAU_01878	Ppb6_01455	VY86_18215
b2257	B738_01759	Phpb_03523	PTE_03815	plu2656	PAU_01879	Ppb6_01456	VY86_18220
b4544	B738_01764	Phpb_03524	PTE_03816	plu2655	PAU_01880	Ppb6_01457	VY86_18225
b2258	B738_01769	Phpb_03525	PTE_03817	plu2654	PAU_01881	Ppb6_01458	VY86_18230
b1708	B738_01774	Phpb_03526	PTE_03818	plu2653	PAU_01883	Ppb6_01459	VY86_18235
b4062,b1531	B738_01354	Phpb_03550	PTE_03827	plu2638	PAU_01893	Ppb6_01468	VY86_18295
b0151	B738_01364	Phpb_03552	PTE_03830	plu2636	PAU_01895	Ppb6_01470	VY86_18305
b1704	B738_01394	Phpb_03558	PTE_03835	plu2630	PAU_01900	Ppb6_01475	VY86_18335
b1703	B738_01399	Phpb_03559	PTE_03836	plu2629	PAU_01901	Ppb6_01476	VY86_18340
b1688	B738_01419	Phpb_03561	PTE_03839	plu2627	PAU_01903	Ppb6_01478	VY86_18350
b1686	B738_01439	Phpb_03563	PTE_03841	plu2625	PAU_01905	Ppb6_01480	VY86_18360
b1684	B738_19522	Phpb_03566	PTE_03849	plu2622	PAU_01907	Ppb6_02190	VY86_18425
b1683	B738_19517	Phpb_03567	PTE_03850	plu2621	PAU_01908	Ppb6_02191	VY86_18430
b1682	B738_19512	Phpb_03568	PTE_03851	plu2620	PAU_01909	Ppb6_02192	VY86_18435
b1681	B738_19507	Phpb_03569	PTE_03852	plu2619	PAU_01910	Ppb6_02193	VY86_18440
b1680	B738_19502	Phpb_03570	PTE_03853	plu2618	PAU_01911	Ppb6_02194	VY86_18445
b1679	B738_19497	Phpb_03571	PTE_03854	plu2617	PAU_01912	Ppb6_02195	VY86_18450
b1113	B738_19492	Phpb_03572	PTE_03855	plu2616	PAU_01913	Ppb6_02196	VY86_18455
b1677	B738_19487	Phpb_03573	PTE_03856	plu2615	PAU_01914	Ppb6_02197	VY86_18460
b1393	B738_19482	Phpb_03574	PTE_03857	plu2614	PAU_01915	Ppb6_02198	VY86_18465
b1676	B738_19477	Phpb_03575	PTE_03858	plu2613	PAU_01920	Ppb6_01795	VY86_18470
b1663	B738_19467	Phpb_03578	PTE_03861	plu2611	PAU_01921	Ppb6_01798	VY86_18490
b1662	B738_19462	Phpb_03579	PTE_03862	plu2610	PAU_01922	Ppb6_01799	VY86_18495
b1661	B738_19442	Phpb_03582	PTE_03865	plu2608	PAU_01924	Ppb6_01802	VY86_18510
b1660	B738_19437	Phpb_03583	PTE_03866	plu2607	PAU_01925	Ppb6_01803	VY86_18515
b1659	B738_19432	Phpb_03584	PTE_03867	plu2606	PAU_01926	Ppb6_01804	VY86_18520
b1658	B738_19427	Phpb_03585	PTE_03868	plu2605	PAU_01927	Ppb6_01805	VY86_18525
b1652	B738_19417	Phpb_03588	PTE_03871	plu2603	PAU_01931	Ppb6_01809	VY86_18535
b1651	B738_19412	Phpb_03589	PTE_03872	plu2602	PAU_01932	Ppb6_01810	VY86_18540
b1648	B738_19407	Phpb_03590	PTE_03873	plu2601	PAU_01933	Ppb6_01811	VY86_18545
b1642	B738_19402	Phpb_03591	PTE_03874	plu2600	PAU_01934	Ppb6_01812	VY86_18550
b1638	B738_19382	Phpb_03594	PTE_03877	plu2597	PAU_01937	Ppb6_01815	VY86_18565
b1637	B738_19377	Phpb_03595	PTE_03878	plu2596	PAU_01938	Ppb6_01816	VY86_18570
b1636	B738_19372	Phpb_03596	PTE_03879	plu2595	PAU_01939	Ppb6_01817	VY86_18575
b1288	B738_19352	Phpb_03599	PTE_03882	plu2592	PAU_01942	Ppb6_01821	VY86_18590
b1290	B738_19347	Phpb_03600	PTE_03883	plu2591	PAU_01943	Ppb6_01822	VY86_18595
b1291	B738_19342	Phpb_03601	PTE_03884	plu2590	PAU_01944	Ppb6_01823	VY86_18600
b1305	B738_19292	Phpb_03607	PTE_03891	plu2584	PAU_01950	Ppb6_01829	VY86_18630
b1306	B738_19287	Phpb_03608	PTE_03892	plu2583	PAU_01951	Ppb6_01830	VY86_18635
b1321	B738_19282	Phpb_03612	PTE_03893	plu2582	PAU_01953	Ppb6_01831	VY86_18640
b1322	B738_19277	Phpb_03613	PTE_03894	plu2581	PAU_01954	Ppb6_01832	VY86_18645
b1323	B738_19272	Phpb_03614	PTE_03895	plu2580	PAU_01956	Ppb6_01833	VY86_18650
b1324	B738_19267	Phpb_03615	PTE_03896	plu2579	PAU_01957	Ppb6_01834	VY86_18655
b1329	B738_19262	Phpb_03616	PTE_03897	plu2578	PAU_01958	Ppb6_01835	VY86_18660
b1342	B738_19257	Phpb_03617	PTE_03898	plu2577	PAU_01963	Ppb6_01836	VY86_18665
b1344	B738_19252	Phpb_03618	PTE_03900	plu2575	PAU_01964	Ppb6_01837	VY86_18670
b0543	B738_18965	Phpb_03627	PTE_03908	plu2566	PAU_01965	Ppb6_01839	VY86_18705
b4529	B738_18960	Phpb_03628	PTE_03909	plu2565	PAU_01966	Ppb6_01840	VY86_18710
b1186	B738_18945	Phpb_03631	PTE_03911	plu2563	PAU_01968	Ppb6_01842	VY86_18720
b1187	B738_18940	Phpb_03632	PTE_03912	plu2562	PAU_01969	Ppb6_01843	VY86_18725
b1189	B738_18935	Phpb_03633	PTE_03913	plu2561	PAU_01970	Ppb6_01844	VY86_18730
b1190	B738_18930	Phpb_03634	PTE_03914	plu2560	PAU_01971	Ppb6_01845	VY86_18735
b1782	B738_18925	Phpb_03635	PTE_03915	plu2559	PAU_01972	Ppb6_01846	VY86_18740
b1779	B738_18920	Phpb_03637	PTE_03917	plu2558	PAU_01974	Ppb6_01848	VY86_18745
b1777	B738_18905	Phpb_03639	PTE_03919	plu2556	PAU_01976	Ppb6_01850	VY86_18755
b1768	B738_18900	Phpb_03640	PTE_03920	plu2555	PAU_01977	Ppb6_01851	VY86_18760
b1767	B738_18895	Phpb_03641	PTE_03921	plu2554	PAU_01978	Ppb6_01852	VY86_18765
b1766	B738_18890	Phpb_04163	PTE_03922	plu2553	PAU_01979	Ppb6_01853	VY86_18770
b1765	B738_18885	Phpb_04164	PTE_03923	plu2552	PAU_01980	Ppb6_01854	VY86_18775
b1763	B738_18865	Phpb_04166	PTE_03925	plu2550	PAU_01982	Ppb6_01856	VY86_18785
b1749	B738_18860	Phpb_04167	PTE_03926	plu2549	PAU_01983	Ppb6_01857	VY86_18790
b1232	B738_18600	Phpb_01641	PTE_02545	plu2504	PAU_02022	Ppb6_00818	VY86_18915
b1233	B738_18595	Phpb_01640	PTE_02546	plu2503	PAU_02023	Ppb6_00817	VY86_18920
b1236	B738_18580	Phpb_01638	PTE_02548	plu2501	PAU_02025	Ppb6_00815	VY86_18930
b2028	B738_18575,B738_25125	Phpb_01637	PTE_02549	plu2500	PAU_02026	Ppb6_00814	VY86_18935
b1237	B738_18565	Phpb_01635	PTE_02551	plu2498	PAU_02028	Ppb6_00812	VY86_18945
b1238	B738_18560	Phpb_01634	PTE_02552	plu2497	PAU_02029	Ppb6_00811	VY86_18950
b1242	B738_18545	Phpb_01633	PTE_02554	plu2495	PAU_02031	Ppb6_00809	VY86_18960
b1244	B738_17252	Phpb_01630	PTE_02557	plu2492	PAU_02034	Ppb6_00806	VY86_18975
b1245	B738_17247	Phpb_01629	PTE_02558	plu2491	PAU_02035	Ppb6_00805	VY86_18980
b1246	B738_17242	Phpb_01628	PTE_02559	plu2490	PAU_02036	Ppb6_00804	VY86_18985
b1247	B738_17237	Phpb_01627	PTE_02560	plu2489	PAU_02037	Ppb6_00803	VY86_18990
b1249	B738_17217	Phpb_01625	PTE_02572	plu2487	PAU_02039	Ppb6_00801	VY86_19005
b4595	B738_17212	Phpb_01624	PTE_02573	plu2486	PAU_02040	Ppb6_00800	VY86_19010
b1252	B738_17207	Phpb_01623	PTE_02574	plu2485	PAU_02041	Ppb6_00799	VY86_19015
b1253	B738_17202	Phpb_01622	PTE_02575	plu2484	PAU_02042	Ppb6_00798	VY86_19020
b1254	B738_17197	Phpb_01621	PTE_02576	plu2483	PAU_02043	Ppb6_00797	VY86_19025
b0814	B738_21038	Phpb_01616,Phpb_01617	PTE_02578	plu2480,plu2481	PAU_02047	Ppb6_00795	VY86_19040
b1255	B738_21033	Phpb_01615	PTE_02579	plu2479	PAU_02048	Ppb6_00794	VY86_19045
b1256	B738_21028	Phpb_01614	PTE_02580	plu2478	PAU_02049	Ppb6_00793	VY86_19050
b1260	B738_21023	Phpb_01613	PTE_02581	plu2467	PAU_02050	Ppb6_00792	VY86_19055
b1261	B738_21018	Phpb_01612	PTE_02582	plu2466	PAU_02051	Ppb6_00791	VY86_19060
b1262	B738_21013	Phpb_01611	PTE_02583	plu2465	PAU_02052	Ppb6_00790	VY86_19065
b1263	B738_21008	Phpb_01610	PTE_02584	plu2464	PAU_02053	Ppb6_00789	VY86_19070
b1267	B738_20928	Phpb_01602	PTE_02593	plu2456	PAU_02064	Ppb6_00780	VY86_19090
b1269	B738_20918	Phpb_00060	PTE_02594	plu2452	PAU_02065	Ppb6_00779	VY86_19095
b1270	B738_20913	Phpb_00061	PTE_02595	plu2451	PAU_02066	Ppb6_00778	VY86_19100
b1275	B738_18154	Phpb_00067	PTE_02601	plu2434	PAU_02075	Ppb6_00773	VY86_19130
b1277	B738_18134	Phpb_00070	PTE_02604	plu2431	PAU_02078	Ppb6_00770	VY86_19145
b1279	B738_18124	Phpb_00072	PTE_02605	plu2429	PAU_02080	Ppb6_00768	VY86_19150
b1280	B738_18119	Phpb_00073	PTE_02606	plu2428	PAU_02081	Ppb6_00767	VY86_19155
b1281	B738_18114	Phpb_00074	PTE_02607	plu2427	PAU_02082	Ppb6_00766	VY86_19160
b1282	B738_18109	Phpb_00075	PTE_02608	plu2426	PAU_02083	Ppb6_00765	VY86_19165
b1111	B738_18104	Phpb_00076	PTE_02609	plu0949,plu2425	PAU_02084	Ppb6_00764	VY86_19170
b1633	B738_17859	Phpb_04131	PTE_02640	plu2383	PAU_02114	Ppb6_00741	VY86_19330
b1632	B738_17854	Phpb_04130	PTE_02641	plu2382	PAU_02115	Ppb6_00740	VY86_19335
b1631	B738_17849	Phpb_04129	PTE_02642	plu2381	PAU_02116	Ppb6_00739	VY86_19340
b1630	B738_17844	Phpb_04128	PTE_02643	plu2380	PAU_02117	Ppb6_00738	VY86_19345
b1628	B738_17824	Phpb_04126	PTE_02645	plu2378	PAU_02119	Ppb6_00736	VY86_19355
b1627	B738_17819	Phpb_04125	PTE_02646	plu2377	PAU_02120	Ppb6_00735	VY86_19360
b1626	B738_17814	Phpb_04124	PTE_02647	plu2376	PAU_02121	Ppb6_00734	VY86_19365
b1624	B738_17809	Phpb_04123	PTE_02648	plu2375	PAU_02122	Ppb6_00733	VY86_19370
b1623	B738_17784	Phpb_04115	PTE_02684	plu2362	PAU_02155	Ppb6_00714	VY86_19430
b1614	B738_06734	Phpb_04114	PTE_02685	plu2361	PAU_02156	Ppb6_00713	VY86_19435
b4181	B738_06684	Phpb_01802	PTE_02694	plu4314	PAU_02171	Ppb6_00700	VY86_19475
b1464	B738_06264	Phpb_04016	PTE_02756	plu2271	PAU_02222	Ppb6_02803	VY86_19855
b1539	B738_06154	Phpb_03972	PTE_02765	plu2233	PAU_02186	Ppb6_00686	VY86_19925
b1583	B738_06149	Phpb_03971	PTE_02766	plu2232	PAU_02185	Ppb6_00687	VY86_19930
b1593	B738_06129	Phpb_03965	PTE_02771	plu2227	PAU_02183	Ppb6_00689	VY86_19940
b1594	B738_06124	Phpb_03964	PTE_02772	plu2226	PAU_02182	Ppb6_00690	VY86_19945
b3104,b3103	B738_06054	Phpb_04099	PTE_02785	plu2346	PAU_01178	Ppb6_01630	VY86_19990
b2542	B738_06014	Phpb_03942	PTE_02790	plu2209	PAU_02352	Ppb6_04108	VY86_20015
b0348	B738_06009	Phpb_03941	PTE_02791	plu2208	PAU_02353	Ppb6_04107	VY86_20020
b2541	B738_06004	Phpb_03940	PTE_02792	plu2207	PAU_02354	Ppb6_04106	VY86_20025
b2540	B738_05999	Phpb_03939	PTE_02793	plu2206	PAU_02355	Ppb6_04105	VY86_20030
b2539	B738_05994	Phpb_03938	PTE_02794	plu2205	PAU_02356	Ppb6_04104	VY86_20035
b2538	B738_06544	Phpb_03937	PTE_02795	plu2204	PAU_02357	Ppb6_04103	VY86_20040
b2537	B738_05974	Phpb_03936	PTE_02796	plu2203	PAU_02358	Ppb6_04102	VY86_20045
b0349	B738_05969	Phpb_03935	PTE_02797	plu2202	PAU_02359	Ppb6_04101	VY86_20050
b0350	B738_05964	Phpb_03934	PTE_02798	plu2201	PAU_02360	Ppb6_04100	VY86_20055
b1334	B738_20588	Phpb_03924	PTE_02807	plu2179	PAU_02371	Ppb6_04098	VY86_20105
b1333	B738_20593	Phpb_03923	PTE_02811	plu2178	PAU_02372	Ppb6_04097	VY86_20110
b2727	B738_20603	Phpb_03921	PTE_02813	plu2176	PAU_02376	Ppb6_04095	VY86_20120
b1602	B738_20653	Phpb_03912	PTE_02822	plu2168	PAU_02397	Ppb6_04032	VY86_20165
b1603	B738_20658	Phpb_03911	PTE_02823	plu2167	PAU_02398	Ppb6_04031	VY86_20170
b1604	B738_20663	Phpb_03910	PTE_02824	plu2166	PAU_02399	Ppb6_04030	VY86_20175
b1605	B738_20683	Phpb_03906	PTE_02828	plu2162	PAU_02403	Ppb6_04025	VY86_20195
b4315,b0530	B738_20688	Phpb_03904	PTE_02830	plu2159	PAU_02406	Ppb6_04023	VY86_20205
b4316,b3143	B738_20693	Phpb_03903	PTE_02831	plu2158	PAU_02407	Ppb6_04022	VY86_20210
b4317,b3144,b0940	B738_20698	Phpb_03902	PTE_02832	plu2157	PAU_02408	Ppb6_04021	VY86_20215
b1413	B738_20733	Phpb_03896	PTE_02835	plu2150	PAU_02416	Ppb6_04014	VY86_20225
b1412	B738_20738	Phpb_03895	PTE_02836	plu2149	PAU_02417	Ppb6_04013	VY86_20230
b1380	B738_20743	Phpb_03891	PTE_02838	plu2145	PAU_02421	Ppb6_04012	VY86_20235
b1379	B738_20748	Phpb_03890	PTE_02839	plu2144	PAU_02422	Ppb6_04011	VY86_20240
b1181	B738_20758	Phpb_03887	PTE_02841	plu2141	PAU_02426	Ppb6_04008	VY86_20250
b1180	B738_20763	Phpb_03886	PTE_02842	plu2140	PAU_02427	Ppb6_04007	VY86_20255
b1179	B738_20768	Phpb_03885	PTE_02843	plu2139	PAU_02428	Ppb6_04006	VY86_20260
b1175	B738_20783	Phpb_03883	PTE_02845	plu2137	PAU_02430	Ppb6_04004	VY86_20270
b1174	B738_20788	Phpb_03882	PTE_02846	plu2136	PAU_02431	Ppb6_04003	VY86_20275
b1806	B738_20818	Phpb_03878	PTE_02850	plu2133	PAU_02435	Ppb6_03999	VY86_20295
b1807	B738_20823	Phpb_03877	PTE_02851	plu2132	PAU_02436	Ppb6_03998	VY86_20300
b1809	B738_20848	Phpb_03875	PTE_02855	plu2128	PAU_02439	Ppb6_03995	VY86_20320
b1599	B738_20863	Phpb_03871	PTE_02859	plu2124	PAU_02441	Ppb6_03993	VY86_20335
b1600	B738_20868	Phpb_03870	PTE_02860	plu2123	PAU_02442	Ppb6_03992	VY86_20340
b1852	B738_25937	Phpb_03869	PTE_02861	plu2122	PAU_02443	Ppb6_03989	VY86_20345
b1853	B738_25932	Phpb_03868	PTE_02862	plu2121	PAU_02444	Ppb6_03988	VY86_20350
b1854	B738_25922	Phpb_03864	PTE_02864	plu2118	PAU_02458	Ppb6_04177	VY86_20355
b1497	B738_08456	Phpb_03859	PTE_02869	plu3613	PAU_02463,PAU_01146	Ppb6_04171,Ppb6_01608	VY86_20375
b1855	B738_25917	Phpb_03858	PTE_02870	plu2117	PAU_02464	Ppb6_04170	VY86_20380
b1856	B738_25912	Phpb_03857	PTE_02871	plu2116	PAU_02465	Ppb6_04169	VY86_20385
b1857	B738_25907	Phpb_03856	PTE_02872	plu2115	PAU_02466	Ppb6_04168	VY86_20390
b1858	B738_25902	Phpb_03855	PTE_02873	plu2114	PAU_02467	Ppb6_04167	VY86_20395
b1859	B738_25897	Phpb_03854	PTE_02874	plu2113	PAU_02468	Ppb6_04166	VY86_20400
b1860	B738_25892	Phpb_03853	PTE_02875	plu2112	PAU_02469	Ppb6_04165	VY86_20405
b1861	B738_25887	Phpb_03852	PTE_02876	plu2111	PAU_02470	Ppb6_04164	VY86_20410
b1863	B738_25882	Phpb_03851	PTE_02877	plu2110	PAU_02471	Ppb6_04163	VY86_20415
b1864	B738_25877	Phpb_03850	PTE_02878	plu2109	PAU_02472	Ppb6_04162	VY86_20420
b1865	B738_25872	Phpb_03849	PTE_02879	plu2108	PAU_02473	Ppb6_04161	VY86_20425
b1866	B738_25867	Phpb_03848	PTE_02880	plu2107	PAU_02474	Ppb6_04160	VY86_20430
b1869	B738_25862	Phpb_03847	PTE_02881	plu2106	PAU_02475	Ppb6_04159	VY86_20435
b1870	B738_25857	Phpb_03844	PTE_02883	plu2103	PAU_02476	Ppb6_04157	VY86_20440
b1871	B738_25852	Phpb_03843	PTE_02884	plu2102	PAU_02477	Ppb6_04156	VY86_20445
b1874	B738_25847	Phpb_03842	PTE_02885	plu2101	PAU_02478	Ppb6_04155	VY86_20450
b1875	B738_25842	Phpb_03841	PTE_02886	plu2097	PAU_02479	Ppb6_04153	VY86_20455
b1056	B738_26582	Phpb_04641	PTE_02888	plu2095	PAU_02497	Ppb6_01762	VY86_20500
b1876	B738_15711	Phpb_04638	PTE_02902	plu2092	PAU_02501	Ppb6_01765	VY86_20520
b1066	B738_15741	Phpb_04635	PTE_02906	plu2090	PAU_02503	Ppb6_01768	VY86_20535
b1065	B738_15746	Phpb_04634	PTE_02907	plu2089	PAU_02504	Ppb6_01769	VY86_20540
b1063	B738_15751	Phpb_04633	PTE_02908	plu2088	PAU_02505	Ppb6_01770	VY86_20545
b1035	B738_15756	Phpb_04632	PTE_02909	plu2087	PAU_02506	Ppb6_01771	VY86_20550
b1033	B738_15761	Phpb_04631	PTE_02910	plu2086	PAU_02507	Ppb6_01772	VY86_20555
b1212	B738_15941	Phpb_04610	PTE_02932	plu2071	PAU_02524	Ppb6_03640	VY86_20630
b1210	B738_15956	Phpb_04608	PTE_02934	plu2069	PAU_02526	Ppb6_03642	VY86_20640
b1209	B738_15961	Phpb_04607	PTE_02935	plu2068	PAU_02527	Ppb6_03643	VY86_20645
b1208	B738_15966	Phpb_04606	PTE_02936	plu2067	PAU_02528	Ppb6_03644	VY86_20650
b1207	B738_15971	Phpb_04605	PTE_02937	plu2066	PAU_02529	Ppb6_03645	VY86_20655
b1205	B738_15976	Phpb_04604	PTE_02938	plu2065	PAU_02530	Ppb6_03646	VY86_20660
b1204	B738_15996	Phpb_00939	PTE_02950	plu2055	PAU_02541	Ppb6_03658	VY86_20665
b1203	B738_16001	Phpb_00940	PTE_02951	plu2054	PAU_02542	Ppb6_03659	VY86_20670
b1439	B738_16031	Phpb_00945	PTE_02956	plu2044	PAU_02546	Ppb6_03664	VY86_20695
b3070	B738_16066	Phpb_00950	PTE_02960	plu2040	PAU_02550	Ppb6_03669	VY86_20715
b0232	B738_21343	Phpb_04011	PTE_02971	plu2265	PAU_03066	Ppb6_03337	VY86_20720
b3370	B738_16071	Phpb_03988	PTE_02962	plu2247	PAU_02154	Ppb6_00715	VY86_20730
b4298,b0268	B738_16081	Phpb_03986	PTE_02964	plu2245	PAU_02152	Ppb6_00717	VY86_20740
b0875	B738_16121	Phpb_00958	PTE_02977	plu2033	PAU_02561	Ppb6_03674	VY86_20780
b1376	B738_16126	Phpb_00959	PTE_02978	plu2032	PAU_02563	Ppb6_03675	VY86_20785
b0607	B738_16136	Phpb_00961	PTE_02979	plu2030	PAU_02565	Ppb6_03677	VY86_20795
b1913	B738_16151	Phpb_00964	PTE_02983	plu2027	PAU_02567	Ppb6_03679	VY86_20810
b1912	B738_16156	Phpb_00965	PTE_02984	plu2026	PAU_02568	Ppb6_03680	VY86_20815
b3376	B738_13149	Phpb_00993	PTE_03573	plu2000	PAU_02578	Ppb6_03695	VY86_20940
b3377	B738_13144	Phpb_00994	PTE_03572	plu1999	PAU_02579	Ppb6_03696	VY86_20945
b3378	B738_13139	Phpb_00995	PTE_03571	plu1998	PAU_02580	Ppb6_03697	VY86_20950
b3381	B738_13134	Phpb_00997	PTE_03569	plu1996	PAU_02582	Ppb6_03699	VY86_20960
b3382	B738_13129	Phpb_00998	PTE_03568	plu1995	PAU_02583	Ppb6_03700	VY86_20965
b3383	B738_13124	Phpb_00999	PTE_03567	plu1994	PAU_02584	Ppb6_03701	VY86_20970
b4193	B738_13079	Phpb_01011	PTE_03554	plu1981	PAU_02589	Ppb6_03709	VY86_21085
b4194	B738_13074	Phpb_01012	PTE_03553	plu1980	PAU_02590	Ppb6_03710	VY86_21090
b4195,b4302	B738_13069	Phpb_01013	PTE_03552	plu1979	PAU_02591	Ppb6_03711	VY86_21095
b2365	B738_21630	Phpb_01021	PTE_03545	plu1969	PAU_02599	Ppb6_03718	VY86_21135
b2364	B738_21620	Phpb_01022	PTE_03544	plu1968	PAU_02600	Ppb6_03719	VY86_21140
b4208	B738_08899	Phpb_01027	PTE_03541	plu1965	PAU_02603	Ppb6_03725	VY86_21155
b1015	B738_08909	Phpb_01031	PTE_03540	plu1958	PAU_02605	Ppb6_03729	VY86_21160
b1921	B738_08924	Phpb_01034	PTE_03538	plu1956	PAU_02607	Ppb6_03731	VY86_21170
b1922	B738_08929	Phpb_01035	PTE_03537	plu1955	PAU_02608	Ppb6_03732	VY86_21175
b1923	B738_08934	Phpb_01036	PTE_03536	plu1954	PAU_02609	Ppb6_03733	VY86_21180
b1925	B738_08949	Phpb_01038	PTE_03534	plu1952	PAU_02611	Ppb6_03735	VY86_21190
b1926	B738_08954	Phpb_01039	PTE_03533	plu1951	PAU_02612	Ppb6_03736	VY86_21195
b1937	B738_08964	Phpb_01042	PTE_03525	plu1949	PAU_02614	Ppb6_03739	VY86_21205
b1938	B738_08969	Phpb_01043	PTE_03524	plu1948	PAU_02615	Ppb6_03740	VY86_21210
b1939	B738_08974	Phpb_01044	PTE_03523	plu1947	PAU_02616	Ppb6_03741	VY86_21215
b1940	B738_08979	Phpb_01045	PTE_03522	plu1946	PAU_02617	Ppb6_03742	VY86_21220
b1942	B738_08994	Phpb_01047	PTE_03520	plu1944	PAU_02619	Ppb6_03744	VY86_21230
b1945	B738_09019	Phpb_01050	PTE_03517	plu1941	PAU_02622	Ppb6_03747	VY86_21245
b1946	B738_09024	Phpb_01051	PTE_03516	plu1940	PAU_02623	Ppb6_03748	VY86_21250
b1947	B738_09029	Phpb_01052	PTE_03515	plu1939	PAU_02624	Ppb6_03749	VY86_21255
b1949	B738_09044	Phpb_01054	PTE_03513	plu1937	PAU_02626	Ppb6_03751	VY86_21265
b1950	B738_09049	Phpb_01055	PTE_03512	plu1936	PAU_02627	Ppb6_03752	VY86_21270
b1083	B738_25395	Phpb_02504	PTE_03504	plu1925	PAU_02641	Ppb6_03785	VY86_21400
b1082	B738_25400	Phpb_02505	PTE_03503	plu1924	PAU_02642	Ppb6_03784	VY86_21405
b1081	B738_25405	Phpb_02506	PTE_03502	plu1923	PAU_02643	Ppb6_03783	VY86_21410
b1080	B738_25410	Phpb_02507	PTE_03501	plu1922	PAU_02644	Ppb6_03782	VY86_21415
b1079	B738_25420	Phpb_02508	PTE_03500	plu1921	PAU_02645	Ppb6_03781	VY86_21420
b1078	B738_25425	Phpb_02509	PTE_03499	plu1920	PAU_02646	Ppb6_03780	VY86_21425
b1077	B738_25430	Phpb_02510	PTE_03498	plu1919	PAU_02647	Ppb6_03779	VY86_21430
b1076	B738_25435	Phpb_02511	PTE_03497	plu1918	PAU_02648	Ppb6_03778	VY86_21435
b1075	B738_25440	Phpb_02512	PTE_03496	plu1917	PAU_02649	Ppb6_03777	VY86_21440
b1074	B738_25445	Phpb_02513	PTE_03495	plu1916	PAU_02650	Ppb6_03776	VY86_21445
b1073	B738_25450	Phpb_02514	PTE_03494	plu1915	PAU_02651	Ppb6_03775	VY86_21450
b1071	B738_25465	Phpb_02516	PTE_03492	plu1913	PAU_02653	Ppb6_03773	VY86_21460
b1070	B738_25470	Phpb_02517	PTE_03491	plu1912	PAU_02654	Ppb6_03772	VY86_21465
b1879	B738_18434	Phpb_02535	PTE_03482	plu1896	PAU_02665	Ppb6_01070	VY86_21515
b1880	B738_18429	Phpb_02536	PTE_03481	plu1895	PAU_02666	Ppb6_01071	VY86_21520
b0586	B738_03996	Phpb_02550	PTE_03090	plu1878	PAU_02678	Ppb6_01091	VY86_21770
b1881	B738_22800	Phpb_02564	PTE_03473	plu1858	PAU_02680	Ppb6_01093	VY86_21785
b1882	B738_22805	Phpb_02565	PTE_03472	plu1857	PAU_02681	Ppb6_01094	VY86_21790
b1883	B738_22810	Phpb_02566	PTE_03471	plu1856	PAU_02682	Ppb6_01095	VY86_21795
b1885	B738_22830	Phpb_02568	PTE_03469	plu1854	PAU_02684	Ppb6_01097	VY86_21805
b1887	B738_22845	Phpb_02570	PTE_03467	plu1852	PAU_02686	Ppb6_01099	VY86_21815
b1889	B738_22860	Phpb_02572	PTE_03465	plu1850	PAU_02688	Ppb6_01101	VY86_21825
b1891	B738_22870	Phpb_02574	PTE_03463	plu1848	PAU_02690	Ppb6_01103	VY86_21835
b1892	B738_22875	Phpb_02575	PTE_03462	plu1847	PAU_02691	Ppb6_01104	VY86_21840
b3508	B738_22885	Phpb_02576	PTE_03461	plu1843	PAU_02694	Ppb6_01107	VY86_21845
b0458	B738_22895	Phpb_02578	PTE_03458	plu1841	PAU_02696	Ppb6_01109	VY86_21855
b1060	B738_22915	Phpb_02583	PTE_03451	plu1818	PAU_02699	Ppb6_01115	VY86_21890
b1054	B738_22935	Phpb_02587	PTE_03448	plu1814	PAU_02703	Ppb6_01119	VY86_21910
b3679	B738_21810	Phpb_02598	PTE_03437	plu1803	PAU_02712	Ppb6_02751	VY86_21955
b0969	B738_25755	Phpb_02615	PTE_03408	plu1786	PAU_02731	Ppb6_02723	VY86_22035
b0968	B738_25760	Phpb_02616	PTE_03407	plu1785	PAU_02732	Ppb6_02722	VY86_22040
b0962	B738_23093	Phpb_02620	PTE_03404	plu1779	PAU_02740	Ppb6_02716	VY86_22055
b0959	B738_23083	Phpb_02623	PTE_03402	plu1777	PAU_02742	Ppb6_02714	VY86_22070
b0958	B738_23078	Phpb_02624	PTE_03401	plu1776	PAU_02743	Ppb6_02713	VY86_22075
b0957	B738_23073	Phpb_02625	PTE_03400	plu1775	PAU_02744	Ppb6_02712	VY86_22080
b0954	B738_14357	Phpb_02628	PTE_03397	plu1772	PAU_02747	Ppb6_02709	VY86_22100
b0952	B738_14372	Phpb_02631	PTE_03394	plu1768	PAU_02749	Ppb6_02706	VY86_22110
b0951	B738_14377	Phpb_02632	PTE_03393	plu1767	PAU_02750	Ppb6_02705	VY86_22115
b0949	B738_14392	Phpb_02634	PTE_03391	plu1765	PAU_02752	Ppb6_02703	VY86_22125
b0948	B738_14397	Phpb_02635	PTE_03390	plu1764	PAU_02753	Ppb6_02702	VY86_22130
b0946	B738_14447	Phpb_02689	PTE_03385	plu1759	PAU_02758	Ppb6_02697	VY86_22155
b0945	B738_14452	Phpb_02690	PTE_03384	plu1758	PAU_02759	Ppb6_02696	VY86_22160
b0932	B738_14457	Phpb_02692	PTE_03383	plu1755	PAU_02761	Ppb6_02694	VY86_22165
b0931	B738_14462	Phpb_02693	PTE_03382	plu1754	PAU_02762	Ppb6_02693	VY86_22170
b0930	B738_14467	Phpb_02694	PTE_03381	plu1753	PAU_02763	Ppb6_02692	VY86_22175
b0241,b2215,b1377	B738_14482	Phpb_02696	PTE_03379	plu1751	PAU_02765	Ppb6_02690	VY86_22185
b0927	B738_14497	Phpb_02698	PTE_03377	plu1749	PAU_02767	Ppb6_02688	VY86_22195
b0926	B738_14502	Phpb_02699	PTE_03376	plu1748	PAU_02768	Ppb6_02687	VY86_22200
b2311	B738_14237	Phpb_02186	PTE_00760	plu3166	PAU_01458	Ppb6_03480	VY86_00365
b2317	B738_14267	Phpb_02180	PTE_00754	plu3172	PAU_01452	Ppb6_03486	VY86_00395
b4546	B738_07596	Phpb_02467	PTE_00710	plu1400	PAU_01410	Ppb6_03535	VY86_00620
b2434	B738_07696	Phpb_02483	PTE_00694	plu1384	PAU_01394	Ppb6_03551	VY86_00700
b0685	B738_25105	Phpb_03083	PTE_04475	plu1329	PAU_03081	Ppb6_01142	VY86_01125
b0660	B738_01974	Phpb_02990	PTE_04447	plu1311	PAU_03146	Ppb6_01250	VY86_01240
b0628	B738_02104	Phpb_02969	PTE_04426	plu1291	PAU_03168	Ppb6_01271	VY86_01345
b2674	B738_02129	Phpb_02964	PTE_04420	plu1286	PAU_03173	Ppb6_01276	VY86_01370
b2595	B738_22060	Phpb_01192	PTE_04346	plu1267	PAU_03193	Ppb6_03149	VY86_01495
b2597	B738_22055	Phpb_01191	PTE_04345	plu1266	PAU_03194	Ppb6_03150	VY86_01500
b2835	B738_21940	Phpb_01167	PTE_04322	plu1247	PAU_03214	Ppb6_03169	VY86_01625
b2569	B738_13338	Phpb_00499	PTE_00618	plu3342	PAU_01303	Ppb6_03097	VY86_02055
b2575	B738_13303	Phpb_00505	PTE_00612	plu3348	PAU_01297	Ppb6_03103	VY86_02085
b0414	B738_04701	Phpb_00896	PTE_00230	plu3899	PAU_03484	Ppb6_01934	VY86_02465
b0588	B738_29213	Phpb_01153	PTE_04185	plu4626	PAU_00891	Ppb6_00075	VY86_02575
b0590	B738_12182	Phpb_01151	PTE_04181	plu4624	PAU_00887	Ppb6_00079	VY86_02595
b0428	B738_04801	Phpb_00881	PTE_00245	plu3879	PAU_03431	Ppb6_02311	VY86_02715
b2750	B738_02775	Phpb_01882	PTE_03954	plu0711	PAU_00684	Ppb6_00118	VY86_03575
b2777	B738_02860	Phpb_01874	PTE_03945	plu0701	PAU_00675	Ppb6_00110	VY86_04195
b0174	B738_13698	Phpb_04195	PTE_00977	plu0677	PAU_00649	Ppb6_03812	VY86_04405
b0020	B738_23228	Phpb_04246	PTE_01078	plu0588	PAU_00552	Ppb6_03905	VY86_04940
b0758	B738_12979	Phpb_04238	PTE_01092	plu0575	PAU_00540	Ppb6_03916	VY86_05010
b4397	B738_14095	Phpb_00931	PTE_01104	plu0561	PAU_00531	Ppb6_03927	VY86_05355
b0002	B738_14085	Phpb_00933	PTE_01101	plu0563	PAU_00533	Ppb6_03924	VY86_05365
b4040	B738_13925	Phpb_01701	PTE_02512	plu4377	PAU_03930	Ppb6_01366	VY86_05575
b3996	B738_00531	Phpb_01435	PTE_02067	plu0488	PAU_00399	Ppb6_03443	VY86_05695
b3354	B738_00971	Phpb_01343	PTE_02143	plu0398	PAU_00309	Ppb6_01392	VY86_06105
b3865	B738_01011	Phpb_01335	PTE_02151	plu0390	PAU_00301	Ppb6_00009	VY86_06145
b3859	B738_01036	Phpb_01326	PTE_02155	plu0380	PAU_00297	Ppb6_00013	VY86_06160
b4180	B738_01136	Phpb_04343	PTE_01345	plu4574	PAU_04073	Ppb6_04298	VY86_06240
b4179	B738_01141	Phpb_04342	PTE_01346	plu4575	PAU_04074	Ppb6_04297	VY86_06245
b4177	B738_01151	Phpb_04340	PTE_01348	plu4577	PAU_04076	Ppb6_04295	VY86_06255
b4166	B738_01211	Phpb_04331	PTE_01357	plu4586	PAU_04085	Ppb6_04286	VY86_06300
b3302	B738_00065	Phpb_01095	PTE_04381	plu4708	PAU_04198	Ppb6_02613	VY86_06860
b3964	B738_18229	Phpb_00056	PTE_01709	plu4737	PAU_04229	Ppb6_00246	VY86_07050
b0759	B738_26132	Phpb_00333	PTE_01989,PTE_01983	plu4831	PAU_04343	Ppb6_00316	VY86_07690
b3614	B738_09141	Phpb_00324	PTE_01975	plu4842	PAU_04350	Ppb6_00326	VY86_07735
b3638	B738_09261	Phpb_00299	PTE_01952	plu4865	PAU_04372	Ppb6_00347	VY86_07850
b3895	B738_09371	Phpb_00278	PTE_01918	plu4885	PAU_04393	Ppb6_00375	VY86_07955
b0296	B738_15189	Phpb_00220	PTE_01877	plu0036	PAU_00031	Ppb6_00412	VY86_08065
b3753	B738_15324	Phpb_00196	PTE_01853	plu0060	PAU_00056	Ppb6_00436	VY86_08185
b3170	B738_03717	Phpb_04390	PTE_01295	plu4531	PAU_04031	Ppb6_04341	VY86_10345
b3829	B738_20308	Phpb_04466	PTE_02468	plu4420	PAU_03891	Ppb6_01325	VY86_10885
b0583	B738_10271	Phpb_03282	PTE_04227	plu0992	PAU_00970	Ppb6_03292	VY86_12495
b4148	B738_10671	Phpb_03755	PTE_01518	plu4129	PAU_03752	Ppb6_02537	VY86_12845
b3460,b3458	B738_10546	Phpb_03786	PTE_01491	plu4098	PAU_03723	Ppb6_02512	VY86_12970
b3454	B738_10521	Phpb_03790	PTE_01487	plu4094	PAU_03719	Ppb6_02508	VY86_12990
b3250	B738_05357	Phpb_02024	PTE_00025	plu4070	PAU_03702	Ppb6_02492	VY86_13170
b3194	B738_05502	Phpb_02048	PTE_00048	plu4033	PAU_03671	Ppb6_02464	VY86_13280
b3057	B738_05782	Phpb_02307	PTE_00152	plu3973	PAU_03553	Ppb6_02375	VY86_13540
b3006	B738_09626	Phpb_02335	PTE_00187	plu3941	PAU_03515	Ppb6_02342	VY86_13750
b4012	B738_13388	Phpb_00534	PTE_00543	plu3511	PAU_01248	Ppb6_03140	VY86_14040
b2559	B738_07991	Phpb_02059	PTE_00633	plu3320	PAU_01320	Ppb6_03079	VY86_14730
b0096	B738_08326	Phpb_00656	PTE_00435	plu3648	PAU_01119	Ppb6_01579	VY86_14960
b0761	B738_19866	Phpb_02392	PTE_04573	plu1474	PAU_02947	Ppb6_02921	VY86_15120
b0841	B738_16623	Phpb_02864	PTE_04668	plu1579	PAU_02865	Ppb6_03011	VY86_15565
b0905	B738_16443	Phpb_02825	PTE_03249	plu1615	PAU_02835	Ppb6_03047	VY86_15755
b2295	B738_20188	Phpb_01493	PTE_00885	plu3094	PAU_01514	Ppb6_01705	VY86_16185
b2263	B738_17123	Phpb_01517	PTE_03240	plu3072	PAU_01539	Ppb6_01684	VY86_16300
b0638	B738_11835	Phpb_00135	PTE_03149	plu2981	PAU_01617	Ppb6_01979	VY86_16785
b2007	B738_12609	Phpb_03824	PTE_03626	plu2843	PAU_01694	Ppb6_02051	VY86_17095
b1086	B738_12584	Phpb_03821	PTE_03630	plu2840	PAU_01697	Ppb6_02054	VY86_17110
b1129	B738_12394	Phpb_03376	PTE_03661	plu2808	PAU_01733	Ppb6_02086	VY86_17265
b2496	B738_11655	Phpb_03429	PTE_03722	plu2752	PAU_01789	Ppb6_02133	VY86_17530
b2508	B738_11320	Phpb_03469	PTE_03759	plu2713	PAU_01826	Ppb6_02163	VY86_17960
b1709	B738_01734	Phpb_03518	PTE_03810	plu2661	PAU_01874	Ppb6_01451	VY86_18195
b1654	B738_19422	Phpb_03587	PTE_03870	plu2604	PAU_01930	Ppb6_01808	VY86_18530
b1640	B738_19387	Phpb_03593	PTE_03876	plu2598	PAU_01936	Ppb6_01814	VY86_18560
b1294	B738_19317	Phpb_03604	PTE_03887	plu2587	PAU_01947	Ppb6_01826	VY86_18615
b1248	B738_17222	Phpb_01626	PTE_02563	plu2488	PAU_02038	Ppb6_00802	VY86_19000
b1271	B738_20908	Phpb_00062	PTE_02596	plu2450	PAU_02067	Ppb6_00777	VY86_19105
b1272	B738_20903	Phpb_00064	PTE_02597	plu2439	PAU_02071	Ppb6_00776	VY86_19110
b1611	B738_06719	Phpb_04112	PTE_02688	plu2359	PAU_02159	Ppb6_00711	VY86_19445
b1610	B738_28287,B738_28477	Phpb_04109	PTE_02691,PTE_01752	plu2356	PAU_02167	Ppb6_00704	VY86_19465
b4183	B738_06669	Phpb_01804	PTE_02696	plu4312	PAU_02173	Ppb6_00698	VY86_19485
b1586	B738_06144	Phpb_03970	PTE_02767	plu2231	PAU_02184	Ppb6_00688	VY86_19935
b1206	B738_15926	Phpb_04613	PTE_02929	plu2074	PAU_02521	Ppb6_03637	VY86_20615
b2945	B738_16116	Phpb_00954	PTE_02976	plu2037	PAU_02553	Ppb6_03673	VY86_20775
b1914	B738_16146	Phpb_00963	PTE_02982	plu2028	PAU_02566	Ppb6_03678	VY86_20805
b1890	B738_22865	Phpb_02573	PTE_03464	plu1849	PAU_02689	Ppb6_01102	VY86_21830
b1951	B738_22920	Phpb_02584	PTE_03450	plu1817	PAU_02700	Ppb6_01116	VY86_21895
b0966	B738_25765	Phpb_02617	PTE_03406	plu1784	PAU_02733	Ppb6_02721	VY86_22045
b3868	B738_23553	Phpb_00464	PTE_02300	plu0235	PAU_00177	Ppb6_00515	*
b0965	B738_23098	Phpb_02618	PTE_03405	plu1781	PAU_02738	Ppb6_02718	*
b2737	B738_18620	Phpb_01645	PTE_02542	plu2508	PAU_02018	Ppb6_01894	*
b2739	B738_18630	Phpb_01647	PTE_02541	plu2510	PAU_02016	Ppb6_01892	*
b3825	B738_18354	Phpb_01145	PTE_01402	plu4619	PAU_04110	Ppb6_04269	*
b3082	B738_17649	Phpb_04280,Phpb_02939	PTE_02392	plu4592,plu2189	PAU_00583	Ppb6_03875	*
b0947	B738_14402	Phpb_02636	PTE_03389	plu1763	PAU_02754	Ppb6_02701	*
b0585	B738_12804	Phpb_01842	PTE_01163	plu4257	PAU_00479	Ppb6_03970	*
b3361	B738_06804	Phpb_00525	PTE_00551	plu3503	PAU_01257	Ppb6_03133	*
b2221	B738_07144	Phpb_00805	PTE_00329	plu3799	PAU_01020	Ppb6_00150	*
b2222	B738_07149	Phpb_00806	PTE_00328	plu3800	PAU_01019	Ppb6_00149	*
b0466	B738_07394	Phpb_00846	PTE_00282	plu3844	PAU_03391	Ppb6_02262	*
b1595	B738_06119	Phpb_03963	PTE_02773	plu2225	PAU_02181	Ppb6_00691	*
b1774	B738_06139	Phpb_01029	PTE_02768	plu1960	PAU_02204	Ppb6_03727	*
b1009	B738_06584	Phpb_01185	PTE_04340	plu1261	PAU_03200	Ppb6_03154	*
b4003	B738_04456	Phpb_00404	PTE_02411	plu0102	PAU_00086	Ppb6_00606	*
b4354,b0598	B738_03782	Phpb_04399	PTE_01282	plu4522	PAU_04022	Ppb6_04350	*
b2125	B738_03787	Phpb_04400	PTE_01281	plu4521	PAU_04021	Ppb6_04351	*
b2126	B738_03792	Phpb_04401	PTE_01280	plu4520	PAU_04020	Ppb6_04352	*
b1127	B738_03075	Phpb_03374	PTE_03659	plu2810	PAU_01730	Ppb6_02084	*
b2785	B738_02495	Phpb_01259	PTE_04123	plu0909	PAU_00830	Ppb6_00905	*
b0123	B738_02655	Phpb_01964	PTE_04091	plu0845	PAU_00797	Ppb6_00975	*
b0347	B738_01874	Phpb_03078	PTE_04469,PTE_04468	plu1437,plu1322	PAU_02254	Ppb6_02793	*
b3337	B738_00170	Phpb_01116	PTE_04359	plu4729	PAU_04219	Ppb6_02634	*
*	B738_25250	Phpb_02094	PTE_02218,PTE_00825	plu3731	PAU_03029	Ppb6_03411	VY86_00915,VY86_00175
*	B738_25285,B738_02345	Phpb_00976,Phpb_02132	PTE_02221,PTE_01782,PTE_03560,PTE_00811	plu3721,plu2016,plu0945,plu3219	PAU_03034,PAU_00867,PAU_02574	Ppb6_00864,Ppb6_03689,Ppb6_03403	VY86_00935,VY86_20920,VY86_03435
*	B738_25310	Phpb_02124	PTE_00801	plu3226	PAU_01990,PAU_01989	Ppb6_01863	VY86_00970,VY86_18810
*	B738_12327	Phpb_03679	PTE_01789,PTE_02654	plu3262	PAU_03838,PAU_03061	Ppb6_03628,Ppb6_03332	VY86_03325,VY86_00080
*	B738_12332	Phpb_03680	PTE_01788,PTE_02655	plu4227,plu3261	PAU_03837,PAU_03060	Ppb6_03331	VY86_03330,VY86_00075,VY86_11875
*	B738_10873	Phpb_01554	PTE_00834	plu0444	PAU_00353	Ppb6_02648	VY86_03790,VY86_05885
*	B738_12964,B738_12974	Phpb_01815,Phpb_01819	PTE_01183,PTE_01181	plu4299,plu4293	PAU_00458,PAU_00460	Ppb6_03356,Ppb6_03354	VY86_05025,VY86_05015
*	B738_01246	Phpb_04319	PTE_01385	plu4599	PAU_04092	Ppb6_04277	VY86_06380,VY86_06350
*	B738_18174	Phpb_00046	PTE_01699	plu4748	PAU_04240	Ppb6_00256	VY86_07105,VY86_07100
*	B738_29341	Phpb_03827,Phpb_01588	PTE_02191	plu0350,plu0323	PAU_00944	Ppb6_03299,Ppb6_00644	VY86_10035,VY86_09990,VY86_09945,VY86_09830,VY86_09785,VY86_09740,VY86_01765,VY86_01720
*	B738_27852	Phpb_04499	PTE_02186,PTE_00813	plu0355	PAU_00969	Ppb6_03293	VY86_10055,VY86_09860
*	B738_03442	Phpb_01869	PTE_02177	plu0335	PAU_00274	Ppb6_00035	VY86_10060,VY86_09865
*	B738_28957	Phpb_03799	PTE_00001,PTE_00491	plu3719,plu1368,plu1150	PAU_01486	Ppb6_03243	VY86_13060,VY86_00260,VY86_00240
*	B738_29351	Phpb_01781	PTE_02193,PTE_00007	plu3590,plu3581	PAU_00956,PAU_00950	Ppb6_01066	VY86_13120,VY86_13080
*	B738_29802,B738_29198	Phpb_01413	PTE_04491	plu0817,plu0467,plu1496	PAU_03545	Ppb6_02368	VY86_13570,VY86_01050,VY86_01025
*	B738_29193,B738_18404,B738_29006	Phpb_02373,Phpb_03139,Phpb_01412	PTE_04488	plu0819,plu0466,plu1495,plu0824,plu0465	PAU_03543,PAU_03663,PAU_03662,PAU_03544,PAU_03542,PAU_03541,PAU_03540	Ppb6_03334,Ppb6_02367,Ppb6_02366,Ppb6_02365	VY86_13575,VY86_10445,VY86_06370,VY86_01035,VY86_01030,VY86_01060,VY86_01055
*	B738_29011,B738_01339,B738_18409	Phpb_01988,Phpb_01410,Phpb_03138	PTE_01389,PTE_01267,PTE_04487	plu0825,plu0820,plu1493,plu0463	PAU_03539,PAU_03660	Ppb6_03333,Ppb6_02364	VY86_13585,VY86_06365,VY86_06395,VY86_01040
b2054	B738_13578	Phpb_00573	PTE_00520	plu3547	PAU_01227	*	VY86_14160,VY86_07605
*	B738_08006	Phpb_00491	PTE_00630,PTE_00628	plu3332	PAU_01315,PAU_01313,PAU_01311	Ppb6_03085,Ppb6_03081	VY86_14740,VY86_02000
*	B738_16478,B738_09446	Phpb_02833	PTE_00775	plu0005	PAU_00101	Ppb6_00542	VY86_15730,VY86_08015
*	B738_16473,B738_09456	Phpb_02831	PTE_01902	plu0006	PAU_00103	Ppb6_03043	VY86_15735,VY86_08030
*	B738_22595	Phpb_04146,Phpb_01658,Phpb_02789,Phpb_02768,Phpb_02731	PTE_02622,PTE_02535,PTE_03347,PTE_03299,PTE_03280	plu2517,plu2398,plu1693,plu1653,plu1716,plu1675	PAU_02803,PAU_02100,PAU_02007	Ppb6_01880,Ppb6_01739,Ppb6_00755	VY86_15930,VY86_19235,VY86_18895,VY86_16020
*	B738_22410	Phpb_02724,Phpb_01663	PTE_03940,PTE_03304,PTE_03285	plu2522,plu1721,plu1699,plu1658	PAU_02798,PAU_02002	Ppb6_01744	VY86_16045,VY86_15955,VY86_18870
*	B738_22405,B738_22535	Phpb_02783,Phpb_02762,Phpb_02723	PTE_03286,PTE_03305	plu1700,plu1681,plu1659	PAU_02797	Ppb6_01745	VY86_16050,VY86_15960
*	B738_22400	Phpb_02722,Phpb_01665	PTE_03938,PTE_03306	plu2524,plu1723,plu1701,plu1660	PAU_02796,PAU_02000	Ppb6_01873,Ppb6_01746	VY86_16055,VY86_18860
*	B738_22395,B738_17924	Phpb_04139,Phpb_02760,Phpb_02781	PTE_02629,PTE_03288,PTE_03307	plu2391,plu1702,plu1661	PAU_02795,PAU_02107	Ppb6_00748,Ppb6_01747	VY86_16060,VY86_19275,VY86_15970
*	B738_22390,B738_17919	Phpb_02720,Phpb_04138	PTE_02630,PTE_03308	plu2390,plu1703,plu1662	PAU_02108	Ppb6_01748,Ppb6_00747	VY86_16065,VY86_19280
*	B738_22385,B738_17914	Phpb_04137,Phpb_02779,Phpb_02758,Phpb_02719,Phpb_01668	PTE_03935,PTE_02631,PTE_03309,PTE_03290	plu2527,plu2389,plu1726,plu1704,plu1685,plu1663	PAU_02794,PAU_02109,PAU_01997	Ppb6_01870,Ppb6_01749,Ppb6_00746	VY86_16070,VY86_15980,VY86_18845,VY86_19285
*	B738_22365,B738_17889,B738_22495	Phpb_04134,Phpb_02775,Phpb_02754,Phpb_02748,Phpb_02715	PTE_02635,PTE_03361,PTE_03294,PTE_03313	plu2385,plu1689,plu1730,plu1708,plu1667	PAU_02790,PAU_02112	Ppb6_00743,Ppb6_01753	VY86_16090,VY86_19305,VY86_16000
*	B738_11163	Phpb_01713	PTE_00907	plu1224	PAU_04273	Ppb6_00661	VY86_17850,VY86_07360
*	B738_03295,B738_06774	Phpb_01937	PTE_00908,PTE_00905,PTE_04271	plu4782,plu0808	PAU_04274	Ppb6_01019	VY86_17860,VY86_17845,VY86_07365
*	B738_28637	Phpb_02347	PTE_03846	plu2447,plu1225,plu1222	PAU_04185,PAU_03494	Ppb6_02585	VY86_18405,VY86_14655,VY86_14320,VY86_08695,VY86_08520,VY86_08300,VY86_07265,VY86_03475,VY86_02130,VY86_01950
*	B738_18780,B738_17904	Phpb_02717	PTE_02633,PTE_03933	plu2387	PAU_01995	Ppb6_01868	VY86_18835,VY86_19295
*	B738_18715	Phpb_02765	PTE_03283,PTE_02532	plu1678,plu2520	PAU_02004	Ppb6_01877	VY86_18880,VY86_15945
*	B738_18675,B738_17994	Phpb_01657	PTE_02621,PTE_02536	plu2399,plu2516	PAU_02008,PAU_02099	Ppb6_01881,Ppb6_00756	VY86_18900,VY86_19230
*	B738_09079,B738_01809	Phpb_04562	PTE_01766	plu2210,plu0284,plu2269	PAU_01431	Ppb6_00464	VY86_21290,VY86_09380
*	B738_02325	Phpb_02127	PTE_02675	plu4199,plu3222	PAU_03815	Ppb6_00209	VY86_22260,VY86_03420
*	B738_12352	Phpb_03688	PTE_02659	plu4211,plu3254	PAU_03833,PAU_03056,PAU_03050	Ppb6_03434,Ppb6_03327	VY86_22375,VY86_03350,VY86_00055
*	B738_16383	Phpb_02809	PTE_04633,PTE_03259	plu1628	PAU_02821	Ppb6_03060	VY86_15815,VY86_15395
*	B738_17063	Phpb_01241,Phpb_01242,Phpb_01243	PTE_04146,PTE_04144	plu0922,plu0921,plu0925,plu0918,plu0919	PAU_00844	Ppb6_00834	VY86_16375,VY86_16350
b4412,b1562,b0018	B738_29451,B738_24925,B738_29456	Phpb_03050	PTE_03844,PTE_03843	plu2882	*	Ppb6_01185	VY86_18375,VY86_18365,VY86_18385,VY86_18370
*	B738_12357	Phpb_03682	PTE_02660	plu4223	PAU_03832	Ppb6_03318	VY86_22370,VY86_03355,VY86_00050
b1747	*	Phpb_01479	PTE_00869	plu3109	PAU_01498	Ppb6_01716	VY86_00120
*	B738_28862	Phpb_02217	PTE_04505	plu3130	PAU_01472	Ppb6_03469	VY86_00235
b1511	*	Phpb_02209	PTE_00783	plu3141	PAU_01471	Ppb6_03471	VY86_00280
*	B738_14182	Phpb_03673	PTE_00770	plu4232	PAU_03843	Ppb6_03624	VY86_00310
b2319	*	Phpb_02178	PTE_00752	plu3174	PAU_01450	Ppb6_03488	VY86_00405
*	B738_14302	Phpb_02175	PTE_00749	plu3177	PAU_01447	Ppb6_03492	VY86_00420
*	B738_03320	Phpb_02170	PTE_00743	plu3182	PAU_01441	Ppb6_03498	VY86_00445
*	B738_03325	Phpb_02169	PTE_00742	plu3183	PAU_01440	Ppb6_03499	VY86_00450
b2324	*	Phpb_02166	PTE_00738	plu3185	PAU_01433	Ppb6_03507	VY86_00475
b0402	*	Phpb_02159	PTE_00732	plu3191	PAU_01425	Ppb6_03513	VY86_00505
*	B738_03390	Phpb_02158	PTE_00731	plu3192	PAU_01424	Ppb6_03514	VY86_00510
*	B738_03395	Phpb_02157	PTE_00730	plu3193	PAU_01423	Ppb6_03515	VY86_00515
*	B738_03410	Phpb_02153	PTE_00728	plu3196	PAU_01421	Ppb6_03517	VY86_00525
*	B738_03415	Phpb_02152	PTE_00727	plu3197	PAU_01420	Ppb6_03518	VY86_00530
b2331	*	Phpb_02151	PTE_00726	plu3198	PAU_01419	Ppb6_03519	VY86_00535
b2341	*	Phpb_02149	PTE_00724	plu3200	PAU_01417	Ppb6_03521	VY86_00545
b2342	*	Phpb_02148	PTE_00723	plu3201	PAU_01416	Ppb6_03522	VY86_00550
b2411	*	Phpb_02469	PTE_00708	plu1398	PAU_01408	Ppb6_03537	VY86_00630
b2416	*	Phpb_02474	PTE_00703	plu1393	PAU_01403	Ppb6_03542	VY86_00655
b2422	*	Phpb_02477	PTE_00700	plu1390	PAU_01400	Ppb6_03545	VY86_00670
b2425	*	Phpb_02480	PTE_00697	plu1387	PAU_01397	Ppb6_03548	VY86_00685
*	B738_07706	Phpb_02485	PTE_00692	plu1382	PAU_01392	Ppb6_03553	VY86_00710
*	B738_07711	Phpb_02486	PTE_00691	plu1381	PAU_01391	Ppb6_03554	VY86_00715
b2519	*	Phpb_02496	PTE_00681	plu1371	PAU_01381	Ppb6_03564	VY86_00765
b2520	*	Phpb_02497	PTE_00680	plu1370	PAU_01380	Ppb6_03565	VY86_00770
*	B738_07826	Phpb_02113	PTE_00676	plu3275	PAU_01370	Ppb6_03567	VY86_00795
b2526	*	Phpb_02109	PTE_00672	plu3279	PAU_01366	Ppb6_03571	VY86_00815
b4239	*	Phpb_02101	PTE_00664	plu3287	PAU_01358	Ppb6_03579	VY86_00855
b2536	*	Phpb_02098	PTE_00661	plu3290	PAU_01355	Ppb6_03582	VY86_00870
*	B738_17068,B738_25275	Phpb_01245	PTE_00812,PTE_02219,PTE_04135	plu3730,plu0917	PAU_00842	Ppb6_03412,Ppb6_00892	VY86_00930
*	B738_25065	Phpb_03089	PTE_04481	plu1335	PAU_03075	Ppb6_01136	VY86_01095
*	B738_25070	Phpb_03088	PTE_04480	plu1334	PAU_03076	Ppb6_01137	VY86_01100
*	B738_25075	Phpb_03087	PTE_04479	plu1333	PAU_03077	Ppb6_01138	VY86_01105
*	B738_25080	Phpb_03086	PTE_04478	plu1332	PAU_03078	Ppb6_01139	VY86_01110
*	B738_25085	Phpb_03085	PTE_04477	plu1331	PAU_03079	Ppb6_01140	VY86_01115
b1735	*	Phpb_03084	PTE_04476	plu1330	PAU_03080	Ppb6_01141	VY86_01120
*	B738_01844	Phpb_03080	PTE_04472	plu1324	PAU_03084	Ppb6_01145	VY86_01140
b0677	*	Phpb_03071	PTE_04457	plu1316	PAU_03090	Ppb6_01151	VY86_01190
b0659	*	Phpb_02989	PTE_04446	plu1310	PAU_03147	Ppb6_01251	VY86_01245
b1753	B738_01999	Phpb_02986	PTE_04443	*	PAU_03150	Ppb6_01254	VY86_01260
b0655	*	Phpb_02985	PTE_04442	plu1307	PAU_03152	Ppb6_01255	VY86_01265
b0642	*	Phpb_02981	PTE_04438	plu1303	PAU_03156	Ppb6_01259	VY86_01285
b0641	*	Phpb_02980	PTE_04437	plu1302	PAU_03157	Ppb6_01260	VY86_01290
b0623	B738_02114	Phpb_02967	*	plu1289	PAU_03170	Ppb6_01273	VY86_01355
b2676	*	Phpb_02962	PTE_04418	plu1284	PAU_03175	Ppb6_01278	VY86_01390
*	B738_02174	Phpb_02958	PTE_04414	plu1280	PAU_03180	Ppb6_01282	VY86_01410
b2610	*	Phpb_01180	PTE_04335	plu1256	PAU_03205	Ppb6_03159	VY86_01560
b2611	*	Phpb_01179	PTE_04334	plu1255	PAU_03206	Ppb6_03160	VY86_01565
b4461	B738_21990	Phpb_01178	PTE_04333	plu1254	PAU_03207	*	VY86_01570
b2688	*	Phpb_01176	PTE_04331	plu1252	PAU_03209	Ppb6_03163	VY86_01580
*	B738_18524	Phpb_01084	PTE_01943,PTE_00576,PTE_00556,PTE_00490	plu4569,plu4339,plu4315,plu4276,plu4128,plu4111,plu3308,plu3208,plu2253,plu1820,plu1761,plu1646,plu1345,plu1116,plu0573,plu0400,plu0328	PAU_04217	Ppb6_02563,Ppb6_02166	VY86_01875
b2614	B738_13273	Phpb_00513	PTE_00596	plu3372	*	Ppb6_03114	VY86_01910
b2567	B738_13348	Phpb_00497	PTE_00621	plu3340	PAU_01305	*	VY86_02045
b2571	*	Phpb_00501	PTE_00616	plu3344	PAU_01301	Ppb6_03099	VY86_02065
b2576	*	Phpb_00506	PTE_00611	plu3349	PAU_01296	Ppb6_03104	VY86_02090
*	B738_06834	Phpb_00530	PTE_00547	plu3507	PAU_01253	Ppb6_03137	VY86_02145
*	B738_06839	Phpb_00531	PTE_00546	plu3508	PAU_01251	Ppb6_03138	VY86_02155
*	B738_06844	Phpb_00752	PTE_00385	plu3740	PAU_01078	Ppb6_01527	VY86_02160
b2061,b0982	*	Phpb_00755	PTE_00382	plu3744	PAU_01074	Ppb6_00201	VY86_02185
*	B738_06884	Phpb_00757	PTE_00380	plu3746	PAU_01072	Ppb6_00199	VY86_02200
*	B738_06889	Phpb_01770,Phpb_00758	PTE_00379	plu3747	PAU_01071	Ppb6_00198	VY86_02205
*	B738_06894	Phpb_00759	PTE_00378	plu3748	PAU_01070	Ppb6_00197	VY86_02210
*	B738_06899	Phpb_00760	PTE_00377	plu3749	PAU_01069	Ppb6_00196	VY86_02215
*	B738_06914	Phpb_00762	PTE_00373	plu3751	PAU_01067	Ppb6_00194	VY86_02230
*	B738_06919	Phpb_00763	PTE_00372	plu3752	PAU_01066	Ppb6_00193	VY86_02235
*	B738_06924	Phpb_00764	PTE_00371	plu3753	PAU_01065	Ppb6_00192	VY86_02240
*	B738_06929	Phpb_00766	PTE_00370	plu3755	PAU_01063	Ppb6_00191	VY86_02245
*	B738_06934	Phpb_00767	PTE_00369	plu3756	PAU_01062	Ppb6_00190	VY86_02250
*	B738_06939	Phpb_00768	PTE_00368	plu3757	PAU_01061	Ppb6_00189	VY86_02255
*	B738_06954	Phpb_00770	PTE_00366	plu3759	PAU_01059	Ppb6_00187	VY86_02265
*	B738_06974	Phpb_00773	PTE_00363	plu3762	PAU_01056	Ppb6_00183	VY86_02280
*	B738_06979	Phpb_00774	PTE_00362	plu3763	PAU_01055	Ppb6_00182	VY86_02285
*	B738_06984	Phpb_00775	PTE_00361	plu3764	PAU_01054	Ppb6_00181	VY86_02290
*	B738_06994	Phpb_00777	PTE_00359	plu3766	PAU_01053	Ppb6_00180	VY86_02300
*	B738_06999	Phpb_00778	PTE_00358	plu3767	PAU_01052	Ppb6_00179	VY86_02305
*	B738_07004	Phpb_00779	PTE_00357	plu3768	PAU_01051	Ppb6_00178	VY86_02310
*	B738_07024	Phpb_00781	PTE_00355	plu3770	PAU_01049	Ppb6_00176	VY86_02320
*	B738_07029	Phpb_00782	PTE_00354	plu3771	PAU_01048	Ppb6_00175	VY86_02325
*	B738_07034	Phpb_00783	PTE_00353	plu3772	PAU_01047	Ppb6_00174	VY86_02330
*	B738_07039	Phpb_00784	PTE_00352	plu3773	PAU_01046	Ppb6_00173	VY86_02335
*	B738_07044	Phpb_00785	PTE_00351	plu3774	PAU_01045	Ppb6_00172	VY86_02340
*	B738_07049	Phpb_00786	PTE_00350	plu3775	PAU_01040	Ppb6_00168	VY86_02345
*	B738_07054	Phpb_00787	PTE_00349	plu3776	PAU_01039	Ppb6_00167	VY86_02350
*	B738_07059	Phpb_00788	PTE_00348	plu3777	PAU_01038	Ppb6_00166	VY86_02355
b3325	*	Phpb_00789	PTE_00347	plu3778	PAU_01037	Ppb6_00165	VY86_02360
*	B738_07074	Phpb_00790	PTE_00346	plu3779	PAU_01036	Ppb6_00164	VY86_02365
*	B738_07084	Phpb_00792	PTE_00344	plu3781	PAU_01035	Ppb6_00162	VY86_02375
*	B738_07089	Phpb_00793	PTE_00343	plu3782	PAU_01034	Ppb6_00161	VY86_02380
*	B738_07099	Phpb_00795	PTE_00341	plu3784	PAU_01032	Ppb6_00159	VY86_02390
*	B738_07104	Phpb_00796	PTE_00340	plu3785	PAU_01031	Ppb6_00158	VY86_02395
*	B738_07109	Phpb_00797	PTE_00339	plu3786	PAU_01030	Ppb6_00157	VY86_02400
*	B738_07114	Phpb_00798	PTE_00338	plu3787	PAU_01029	Ppb6_00156	VY86_02405
b1557,b1552,b0990	B738_07129	Phpb_00799	*	plu3790	PAU_01028	Ppb6_00155	VY86_02410
b0409	*	Phpb_00898	PTE_00228	plu3901	PAU_03487	Ppb6_01936	VY86_02475
b3447	*	Phpb_00906	PTE_00221	plu3908	PAU_03499	Ppb6_01943	VY86_02510
b0401	*	Phpb_00907	PTE_00220	plu3909	PAU_03500	Ppb6_01944	VY86_02515
b0398	*	Phpb_00910	PTE_00217	plu3912	PAU_03503	Ppb6_01947	VY86_02530
b0397	*	Phpb_00911	PTE_00216	plu3913	PAU_03504	Ppb6_01948	VY86_02535
*	B738_05849	Phpb_00956	PTE_00212	plu2035	PAU_02286,PAU_02284	Ppb6_02766	VY86_02550
b0212	*	Phpb_03206	PTE_04151	plu0940	PAU_00858	Ppb6_00872	VY86_02615
*	B738_12232	Phpb_03211	PTE_04156	plu0944	PAU_00862	Ppb6_00867	VY86_02640
b2927	*	Phpb_03217	PTE_04163	plu0955	PAU_00877	Ppb6_00855	VY86_02660
b2926	*	Phpb_03218	PTE_04164	plu0956	PAU_00878	Ppb6_00854	VY86_02665
b0420	*	Phpb_00889	PTE_00238	plu3887	PAU_03439	Ppb6_02318	VY86_02680
b0427	*	Phpb_00882	PTE_00244	plu3880	PAU_03432	Ppb6_02312	VY86_02710
b0436	*	Phpb_00872	PTE_00254	plu3870	PAU_03422	Ppb6_02302	VY86_02760
b0438	*	Phpb_00870	PTE_00256	plu3868	PAU_03416	Ppb6_02286	VY86_02775
b0444	*	Phpb_00864	PTE_00262	plu3862	PAU_03410	Ppb6_02280	VY86_02805
b0448	*	Phpb_00861	PTE_00265	plu3859	PAU_03407	Ppb6_02277	VY86_02820
b0452	*	Phpb_00857	PTE_00269	plu3855	PAU_03403	Ppb6_02273	VY86_02840
*	B738_07429	Phpb_00851	PTE_00276	plu3849	PAU_03396	Ppb6_02267	VY86_02870
*	B738_07424	Phpb_00850	PTE_00277	plu3848	PAU_03395	Ppb6_02266	VY86_02875
*	B738_07404	Phpb_00848	PTE_00280	plu3846	PAU_03393	Ppb6_02264	VY86_02890
*	B738_07399	Phpb_00847	PTE_00281	plu3845	PAU_03392	Ppb6_02263	VY86_02895
*	B738_07334	Phpb_00833	PTE_00299	plu3832	PAU_00975	Ppb6_03286	VY86_03010
b0482	*	Phpb_00828	PTE_00305	plu3826	PAU_00990	Ppb6_03271	VY86_03035
*	B738_07234	Phpb_00816	PTE_00317	plu3813	PAU_00993	Ppb6_03267	VY86_03095
*	B738_07229	Phpb_00815	PTE_00318	plu3812	PAU_00994	Ppb6_03266	VY86_03100
*	B738_22155	Phpb_01900	PTE_03970	plu0735	PAU_00697	Ppb6_01054	VY86_03510
*	B738_22160	Phpb_01898,Phpb_01897	PTE_03968	plu0734,plu0732	PAU_00698	Ppb6_00132	VY86_03515
b2741	*	Phpb_01890	PTE_03962	plu0719	PAU_00692	Ppb6_00126	VY86_03535
b2095,b3132	*	Phpb_01951	PTE_04074	plu0833	PAU_00773	Ppb6_00988	VY86_03605
b3139	*	Phpb_01954	PTE_04077	plu0836	PAU_00776	Ppb6_00985	VY86_03620
b0129	*	Phpb_01956	PTE_04079	plu0838	PAU_00778	Ppb6_00983	VY86_03630
b0148	*	Phpb_01277	PTE_04107	plu0882	PAU_00813	Ppb6_00958	VY86_03760
*	B738_02550	Phpb_01267	PTE_04114	plu0901	PAU_00821	Ppb6_00913	VY86_03775
b2786	*	Phpb_01260	PTE_04122	plu0908	PAU_00829	Ppb6_00906	VY86_03840
b2784	*	Phpb_01258	PTE_04124	plu0910	PAU_00831	Ppb6_00904	VY86_03850
b2779	*	Phpb_01247	PTE_04134	plu0913	PAU_00841	Ppb6_00893	VY86_03880
*	B738_22115	Phpb_01910	PTE_03982	plu0747	PAU_00708	Ppb6_01041	VY86_03910
b2757	*	Phpb_01912	PTE_03984	plu0749	PAU_00710	Ppb6_01039	VY86_03920
*	B738_03285	Phpb_03178	PTE_03995	plu0767	PAU_00722	Ppb6_01034	VY86_03975
*	B738_03280	Phpb_00078	PTE_03996	plu2423	PAU_02086	Ppb6_00762	VY86_03980
*	B738_03255	Phpb_03188	PTE_04001	plu0770	PAU_00726	Ppb6_01030	VY86_04010
b0718	*	Phpb_03189	PTE_04002	plu0771	PAU_00727	Ppb6_01029	VY86_04015
*	B738_03215	Phpb_03195	PTE_04008	plu0777	PAU_00733	Ppb6_01023	VY86_04040
*	B738_03210	Phpb_03196	PTE_04009	plu0778	PAU_00734	Ppb6_01022	VY86_04045
b1985	*	Phpb_01926	PTE_04030	plu0798	PAU_00749	Ppb6_01010	VY86_04100
*	B738_03005	Phpb_01931	PTE_04035	plu0801	PAU_00756	Ppb6_01003	VY86_04120
*	B738_03000	Phpb_01932	PTE_04036	plu0802	PAU_00757	Ppb6_01002	VY86_04125
*	B738_02915	Phpb_01941	PTE_04051	plu0811	PAU_00763	Ppb6_00998	VY86_04150
*	B738_02910	Phpb_01942	PTE_04052	plu0812	PAU_00764	Ppb6_00997	VY86_04155
b3667	*	Phpb_01943	PTE_04053	plu0813	PAU_00765	Ppb6_00996	VY86_04160
b2764	*	Phpb_01876	PTE_03947	plu0703	PAU_00677	Ppb6_00112	VY86_04185
b0197	*	Phpb_04177	PTE_00959	plu0695	PAU_00667	Ppb6_03794	VY86_04250
b0192	*	Phpb_04181	PTE_00963	plu0691	PAU_00663	Ppb6_03798	VY86_04270
b0188	*	Phpb_04183	PTE_00965	plu0689	PAU_00661	Ppb6_03800	VY86_04345
b0173	*	Phpb_04196	PTE_00978	plu0676	PAU_00648	Ppb6_03813	VY86_04410
*	B738_13638	Phpb_04206	PTE_00991	plu0666	PAU_03265	Ppb6_03339	VY86_04460
b2794	*	Phpb_04211	PTE_00996	plu0662	PAU_00612	Ppb6_03848	VY86_04530
*	B738_04926	Phpb_04215	PTE_01000	plu0658	PAU_00608	Ppb6_03852	VY86_04550
*	B738_04946	Phpb_04218	PTE_01003	plu0655	PAU_00605	Ppb6_03855	VY86_04565
*	B738_05096	Phpb_04063	PTE_01024,PTE_01025	plu2318	PAU_02300	Ppb6_00448	VY86_04690
*	B738_05101	Phpb_04062	PTE_01026	plu2317	PAU_02299	Ppb6_00447	VY86_04700
*	B738_05106	Phpb_04068,Phpb_03736	PTE_01027	plu2323	PAU_02305	Ppb6_00453	VY86_04705
*	B738_05111	Phpb_04067	PTE_01028	plu2322	PAU_02304	Ppb6_00452	VY86_04710
b2821	*	Phpb_04286	PTE_01035	plu0631	PAU_00590	Ppb6_03868	VY86_04745
b2822	*	Phpb_04285	PTE_01036	plu0630	PAU_00589	Ppb6_03869	VY86_04750
b2828	*	Phpb_04276	PTE_01044	plu0622	PAU_00581	Ppb6_03877	VY86_04790
b0053	*	Phpb_04262	PTE_01062	plu0611	PAU_00569	Ppb6_03888	VY86_04860
b0032	*	Phpb_04254	PTE_01070	plu0603	PAU_00561	Ppb6_03897	VY86_04900
b0026	*	Phpb_04249	PTE_01075	plu0591	PAU_00555	Ppb6_03902	VY86_04925
b3723	B738_23258	*	PTE_01082	plu0584	PAU_00548	Ppb6_03908	VY86_04955
b0757	*	Phpb_04239	PTE_01090	plu0576	PAU_00541	Ppb6_03915	VY86_05005
*	B738_12969	Phpb_01818	PTE_02280,PTE_01182	plu4294	PAU_00459	Ppb6_03355	VY86_05020
*	B738_12934	Phpb_01825	PTE_01175	plu4286	PAU_00469	Ppb6_03346	VY86_05050
b0383	*	Phpb_01843	PTE_01162	plu4256	PAU_00480	Ppb6_03969	VY86_05155
b4382	B738_12684	Phpb_01857	PTE_01139	*	PAU_00514	Ppb6_03945	VY86_05270
*	B738_12669	Phpb_01860	PTE_01136	plu0523	PAU_00517	Ppb6_03942	VY86_05285
*	B738_12664	Phpb_01861	PTE_01135	plu0524	PAU_00518	Ppb6_03941	VY86_05290
b4392	*	Phpb_00926	PTE_01109	plu0556	PAU_00526	Ppb6_03932	VY86_05330
*	B738_13970	Phpb_01688	PTE_02521	plu4389	PAU_00423	Ppb6_03380	VY86_05535
*	B738_13965	Phpb_01689	PTE_02520	plu4388	PAU_00424	Ppb6_03379	VY86_05540
*	B738_13960	Phpb_01690	PTE_02519	plu4387	PAU_00425	Ppb6_03378	VY86_05545
*	B738_13955	Phpb_01691	PTE_02518	plu4386	PAU_00426	Ppb6_03377	VY86_05550
*	B738_13950	Phpb_01692	PTE_02517	plu4385	PAU_00427	Ppb6_03376	VY86_05555
b4041	*	Phpb_01702	PTE_02511	plu4376	PAU_03929	Ppb6_01365	VY86_05580
b1762	*	Phpb_01706	PTE_02507	plu4372	PAU_03924	Ppb6_01361	VY86_05600
*	B738_13870	Phpb_01709	PTE_02504	plu4369	PAU_03920	Ppb6_01357	VY86_05610
b4016	*	Phpb_01683	PTE_02525	plu4394	PAU_00418	Ppb6_03385	VY86_05615
b4014	*	Phpb_01681	PTE_02527	plu4396	PAU_00416	Ppb6_03387	VY86_05625
b4013	*	Phpb_01680	PTE_02528	plu4397	PAU_00409	Ppb6_03388	VY86_05630
*	B738_00536	Phpb_01434	PTE_02068	plu0487	PAU_00398	Ppb6_03444	VY86_05700
*	B738_00576	Phpb_01425	PTE_02076	plu0480	PAU_00387	Ppb6_02658	VY86_05735
*	B738_00581	Phpb_01423	PTE_02078	plu0477	PAU_00385	Ppb6_02662	VY86_05740
b0845	*	Phpb_01422	PTE_02079	plu0476	PAU_00384	Ppb6_02663	VY86_05745
b1317	*	Phpb_01421	PTE_02080	plu0475	PAU_00383	Ppb6_02664	VY86_05750
*	B738_00616	Phpb_01419	PTE_02082	plu0473	PAU_00381	Ppb6_02666	VY86_05760
b2017	B738_00666	Phpb_02140,Phpb_04026	PTE_02088	plu3211,plu2280	*	Ppb6_02168	VY86_05790
*	B738_00671	Phpb_01407	PTE_02089	plu0461	PAU_00370	Ppb6_02672	VY86_05795
b4035	*	Phpb_01403	PTE_02093	plu0457	PAU_00366	Ppb6_02676	VY86_05825
b4037	*	Phpb_01401	PTE_02095	plu0455	PAU_00364	Ppb6_02678	VY86_05835
*	B738_00731	Phpb_01397	PTE_02097	plu0451	PAU_00362	Ppb6_02655	VY86_05850
*	B738_00766	Phpb_01393	PTE_02101	plu0447	PAU_00358	Ppb6_02651	VY86_05870
*	B738_00771	Phpb_01392	PTE_02102	plu0446	PAU_00357	Ppb6_02650	VY86_05875
b3340	*	Phpb_01378	PTE_02116	plu0431	PAU_00341	Ppb6_01419	VY86_05955
b3345	*	Phpb_01373	PTE_02121	plu0426	PAU_00336	Ppb6_01414	VY86_05980
b3348	B738_00881	Phpb_01370	PTE_02124	plu0423	*	Ppb6_01411	VY86_05995
b3350	B738_00896	Phpb_01367	PTE_02127	*	PAU_00328	Ppb6_01406	VY86_06010
b3351	B738_00901	Phpb_01366	PTE_02128	*	PAU_00327	Ppb6_01405	VY86_06015
*	B738_00911	Phpb_01364	PTE_02130	plu0410	PAU_00325	Ppb6_01403	VY86_06025
*	B738_00931	Phpb_01354	PTE_02137	plu0404	PAU_00318	Ppb6_01398	VY86_06080
b2578	*	Phpb_01345	PTE_02141	plu0401	PAU_00311	Ppb6_01394	VY86_06095
b3353	*	Phpb_01344	PTE_02142	plu0399	PAU_00310	Ppb6_01393	VY86_06100
b3355	*	Phpb_01342	PTE_02144	plu0397	PAU_00308	Ppb6_01391	VY86_06110
b3863	*	Phpb_01332	PTE_02153	plu0386	PAU_00299	Ppb6_00011	VY86_06150
b3856	B738_01046	Phpb_01324	PTE_02157	plu0378	PAU_00295	*	VY86_06170
*	B738_01076	Phpb_04353	PTE_01336	plu4563	PAU_04063	Ppb6_04308	VY86_06190
*	B738_01081	Phpb_04352	PTE_01337	plu4564	PAU_04064	Ppb6_04307	VY86_06195
*	B738_12759	Phpb_04351	PTE_01338	plu4565	PAU_04065	Ppb6_04306	VY86_06200
*	B738_01101	Phpb_04350	PTE_01339	plu4566	PAU_04066	Ppb6_04305	VY86_06205
*	B738_01106	Phpb_04349	PTE_01340	plu4567	PAU_04067	Ppb6_04304	VY86_06210
b4201	B738_01126	Phpb_04345	*	plu4572	PAU_04071	Ppb6_04300	VY86_06230
b4171	*	Phpb_04335	PTE_01353	plu4582	PAU_04081	Ppb6_04290	VY86_06280
b4169	*	Phpb_04333	PTE_01355	plu4584	PAU_04083	Ppb6_04288	VY86_06290
b4161	*	Phpb_04322	PTE_01365	plu4596	PAU_04089	Ppb6_04280	VY86_06335
*	B738_18334	Phpb_01162	PTE_01406	plu4633	PAU_04115	Ppb6_04265	VY86_06440
b3810	*	Phpb_00459	PTE_01411	plu4639	PAU_04120	Ppb6_04260	VY86_06470
b3809	*	Phpb_00458	PTE_01412	plu4640	PAU_04121	Ppb6_04259	VY86_06475
b3806	*	Phpb_00455	PTE_01415	plu4643	PAU_04124	Ppb6_04255	VY86_06490
b3793	*	Phpb_00443	PTE_01428	plu4652	PAU_04132	Ppb6_04244	VY86_06550
b4481	*	Phpb_00442	PTE_01429	plu4653	PAU_04133	Ppb6_04243	VY86_06555
b3789	*	Phpb_00438	PTE_01433	plu4657	PAU_04137	Ppb6_04239	VY86_06575
b3785	*	Phpb_00434	PTE_01437	plu4661	PAU_04141	Ppb6_04235	VY86_06595
b3783	*	Phpb_00432	PTE_01439	plu4663	PAU_04143	Ppb6_04233	VY86_06605
b3780	*	Phpb_00430	PTE_01441	plu4665	PAU_04145	Ppb6_04231	VY86_06615
b3774	*	Phpb_00427	PTE_01444	plu4668	PAU_04148	Ppb6_04228	VY86_06630
*	B738_00375	Phpb_00425	PTE_01446	plu4670	PAU_04150	Ppb6_04226	VY86_06640
*	B738_00380	Phpb_00424	PTE_01447	plu4671	PAU_04151	Ppb6_04225	VY86_06645
*	B738_00385	Phpb_00423	PTE_01448	plu4672	PAU_04152	Ppb6_04224	VY86_06650
*	B738_00390	Phpb_00422	PTE_01449	plu4673	PAU_04153	Ppb6_04223	VY86_06655
*	B738_00395	Phpb_00421	PTE_01450	plu4674	PAU_04154	Ppb6_04222	VY86_06660
*	B738_00400	Phpb_00420	PTE_01451	plu4675	PAU_04155	Ppb6_04221	VY86_06665
*	B738_00405	Phpb_00419	PTE_01452	plu4676	PAU_04156	Ppb6_04220	VY86_06670
*	B738_00410	Phpb_00418	PTE_01453	plu4677	PAU_04157	Ppb6_04219	VY86_06675
*	B738_00415	Phpb_00417	PTE_01454	plu4678	PAU_04158	Ppb6_04218	VY86_06680
*	B738_00420	Phpb_00416	PTE_01455	plu4679	PAU_04159	Ppb6_04217	VY86_06685
*	B738_00425	Phpb_00415	PTE_01456	plu4680	PAU_04160	Ppb6_04216	VY86_06690
b3772	*	Phpb_00414	PTE_01457	plu4681	PAU_04161	Ppb6_04215	VY86_06695
b4480	B738_00475	Phpb_00407	PTE_01464	plu4688	*	Ppb6_04208	VY86_06730
b3280	B738_24200	Phpb_01075	PTE_04401	plu4690	*	Ppb6_02587	VY86_06770
b3289	*	Phpb_01082	PTE_04394	plu4697	PAU_04179	Ppb6_02594	VY86_06805
b3312	B738_00115	Phpb_01105	PTE_04371	plu4718	*	Ppb6_02623	VY86_06910
b3956	*	Phpb_00047	PTE_01700	plu4746	PAU_04239	Ppb6_00255	VY86_07095
b3935	*	Phpb_00035	PTE_01689	plu4759	PAU_04247	Ppb6_00262	VY86_07150
b3934	*	Phpb_00034	PTE_01688	plu4760	PAU_04248	Ppb6_00263	VY86_07155
b3931	*	Phpb_00031	PTE_01685	plu4763	PAU_04251	Ppb6_00266	VY86_07170
b3924	*	Phpb_00024	PTE_01679	plu4769	PAU_04259	Ppb6_00273	VY86_07200
*	B738_26017	Phpb_00017	PTE_01671	plu4776	PAU_04266	Ppb6_00280	VY86_07235
*	B738_26012	Phpb_00016	PTE_01670	plu4777	PAU_04267	Ppb6_00281	VY86_07240
*	B738_15059	Phpb_00242	PTE_01898	plu0010	PAU_00008	Ppb6_00391	VY86_07330
*	B738_15064	Phpb_00241	PTE_01897	plu0011	PAU_00009	Ppb6_00392	VY86_07335
*	B738_15074	Phpb_00240	PTE_01896	plu0013	PAU_00010	Ppb6_00393	VY86_07345
*	B738_15079	Phpb_00239	PTE_01895	plu0014	PAU_04271,PAU_00011	Ppb6_00394	VY86_07350
*	B738_15114	Phpb_02649,Phpb_00226	PTE_01889	plu0022	PAU_00017	Ppb6_00400	VY86_07390
*	B738_15124	Phpb_00228	PTE_01887	plu0024	PAU_04283,PAU_00019	Ppb6_00402	VY86_07400
*	B738_15139	Phpb_00230	PTE_01885	plu0026	PAU_00022	Ppb6_00404	VY86_07435
*	B738_25977,B738_24292	Phpb_00363	PTE_02017	plu4796	PAU_04311	Ppb6_00286	VY86_07515
*	B738_24267	Phpb_00360	PTE_02014	plu4799	PAU_04314	Ppb6_00289	VY86_07530
*	B738_25967	Phpb_00358	PTE_02012	plu4801	PAU_04316	Ppb6_00291	VY86_07540
*	B738_26042	Phpb_00357	PTE_02011	plu4802	PAU_04317	Ppb6_00292	VY86_07545
*	B738_26112,B738_24262	Phpb_00350	PTE_02005	plu4808	PAU_04322	Ppb6_00297	VY86_07575
*	B738_24232	Phpb_00348	PTE_02002	plu4810	PAU_04325	Ppb6_00299	VY86_07585
b3607	*	Phpb_00329	PTE_01980	plu4837	PAU_04345	Ppb6_00320	VY86_07710
b3613	*	Phpb_00325	PTE_01976	plu4841	PAU_04349	Ppb6_00325	VY86_07730
b3621	*	Phpb_00319	PTE_01970	plu4849	PAU_04355	Ppb6_00331	VY86_07760
*	B738_09186	Phpb_00316	PTE_01967	plu4850	PAU_04356	Ppb6_00332	VY86_07775
*	B738_09191	Phpb_00313	PTE_01966	plu4851	PAU_04359	Ppb6_00335	VY86_07780
*	B738_09211	Phpb_00309	PTE_01962	plu4855	PAU_04361	Ppb6_00337	VY86_07800
*	B738_09231	Phpb_00305	PTE_01958	plu4859	PAU_04365	Ppb6_00341	VY86_07820
*	B738_09236	Phpb_00304	PTE_01957	plu4860	PAU_04366	Ppb6_00342	VY86_07825
*	B738_09246	Phpb_00302	PTE_01955	plu4862	PAU_04368	Ppb6_00344	VY86_07835
b3639	*	Phpb_00298	PTE_01951	plu4866	PAU_04374	Ppb6_00348	VY86_07855
*	B738_09291	Phpb_00294	PTE_01945	plu4870	PAU_04378	Ppb6_00353	VY86_07875
*	B738_09311	Phpb_00280	PTE_01933	plu4882	PAU_04381	Ppb6_00360	VY86_07895
*	B738_09356	Phpb_00271,Phpb_00270	PTE_01925	plu4892,plu4894	PAU_04389	Ppb6_00369	VY86_07930
b3894	*	Phpb_00276	PTE_01921	plu4887	PAU_04392	Ppb6_00373	VY86_07945
b3704	*	Phpb_00252	PTE_01912	plu4908	PAU_04400	Ppb6_00381	VY86_07985
b3700	*	Phpb_00248	PTE_01908	plu0003	PAU_00003	Ppb6_00385	VY86_08005
b3699	*	Phpb_00247	PTE_01907	plu0004	PAU_00004	Ppb6_00386	VY86_08010
b3733	*	Phpb_00215	PTE_01872	plu0041	PAU_00037	Ppb6_00417	VY86_08090
b3745	*	Phpb_00203	PTE_01860	plu0053	PAU_00049	Ppb6_00429	VY86_08150
b3746	*	Phpb_00202	PTE_01859	plu0054	PAU_00050	Ppb6_00430	VY86_08155
b3754	*	Phpb_00195	PTE_01852	plu0061	PAU_00057	Ppb6_00437	VY86_08190
*	B738_03190	Phpb_01991	PTE_02432	plu0081	PAU_00871	Ppb6_00860	VY86_08270
b3387	*	Phpb_01983	PTE_02427	plu0087	PAU_00069	Ppb6_00621	VY86_08335
b3388	*	Phpb_01982	PTE_02426	plu0088	PAU_00070	Ppb6_00620	VY86_08340
b3391	*	Phpb_01979	PTE_02423	plu0091	PAU_00073	Ppb6_00617	VY86_08355
*	B738_04526	Phpb_01978	PTE_02422	plu0092	PAU_00074	Ppb6_00616	VY86_08360
*	B738_04521	Phpb_01977	PTE_02421	plu0093	PAU_00075	Ppb6_00615	VY86_08365
b3396	*	Phpb_01975	PTE_02419	plu0095	PAU_00077	Ppb6_00613	VY86_08375
b3398	*	Phpb_01973	PTE_02417	plu0097	PAU_00080	Ppb6_00611	VY86_08385
*	B738_04451	Phpb_00403	PTE_02410	plu0103	PAU_00087	Ppb6_00605	VY86_08445
*	B738_04436	Phpb_00400	PTE_02400	plu0105	PAU_00091	Ppb6_00603	VY86_08455
*	B738_04371	Phpb_02946	PTE_02386	plu0115	PAU_00096	Ppb6_00597	VY86_08515
*	B738_04296	Phpb_01448	PTE_02364	plu0157	PAU_00110	Ppb6_00553	VY86_08755
*	B738_04286	Phpb_01447	PTE_02362	plu0158	PAU_00111	Ppb6_00554	VY86_08765
*	B738_04281	Phpb_01446	PTE_02361	plu0159	PAU_00112	Ppb6_00555	VY86_08770
*	B738_04276	Phpb_01444	PTE_02359	plu0161	PAU_00114	Ppb6_00556	VY86_08780
*	B738_04256	Phpb_02927	PTE_01158	plu0167	PAU_00118	Ppb6_00559	VY86_08790
b3579	*	Phpb_02922	PTE_02351	plu0172	PAU_00122	Ppb6_00563	VY86_08820
b4323	*	Phpb_02919	PTE_02348	plu0175	PAU_00125	Ppb6_00566	VY86_08835
b3728	*	Phpb_02893	PTE_02324	plu0214	PAU_00162	Ppb6_00529	VY86_09000
b3725	*	Phpb_02890	PTE_02321	plu0217	PAU_00165	Ppb6_00526	VY86_09015
*	B738_04036	Phpb_02888	PTE_02319	plu0219	PAU_00167	Ppb6_00524	VY86_09025
*	B738_04031	Phpb_02887	PTE_02318	plu0220	PAU_00168	Ppb6_00523	VY86_09030
*	B738_04026	Phpb_02886	PTE_02317	plu0221	PAU_00169	Ppb6_00522	VY86_09035
*	B738_23573	Phpb_00468	PTE_02296	plu0239	PAU_00181	Ppb6_00511	VY86_09115
*	B738_23583	Phpb_00470	PTE_02294	plu0240	PAU_00182	Ppb6_00508	VY86_09125
b3885	*	Phpb_00471	PTE_02293	plu0241	PAU_00183	Ppb6_00507	VY86_09130
*	B738_24667	Phpb_04586	PTE_02276	plu0257	PAU_02142	Ppb6_00725,Ppb6_00491	VY86_09255
*	B738_24662	Phpb_04585	PTE_02275	plu0258	PAU_02140	Ppb6_00726	VY86_09260
b3652	*	Phpb_04584	PTE_02274	plu0259	PAU_00196	Ppb6_00489	VY86_09265
*	B738_24642	Phpb_04582	PTE_02272	plu0261	PAU_00198	Ppb6_00487	VY86_09275
*	B738_24637	Phpb_04581	PTE_02271	plu0262	PAU_00199	Ppb6_00486	VY86_09280
*	B738_24627	Phpb_04579	PTE_02269	plu0264	PAU_00201	Ppb6_00484	VY86_09290
*	B738_24622	Phpb_04578	PTE_02268	plu0265	PAU_00202	Ppb6_00483	VY86_09295
*	B738_24612	Phpb_04576	PTE_02266	plu0267	PAU_00204	Ppb6_00481	VY86_09305
*	B738_24582	Phpb_04573	PTE_02263	plu0270	PAU_00207	Ppb6_00478	VY86_09320
b3527	*	Phpb_04525	PTE_02224	plu0306	PAU_00237	Ppb6_00826	VY86_09540
*	B738_19067	Phpb_04524	PTE_02212	plu0307	PAU_00241	Ppb6_00823	VY86_09545
*	B738_19202	Phpb_04515	PTE_02207	plu0318	PAU_00254	Ppb6_03238	VY86_09635
b1916	*	Phpb_04514	PTE_02206	plu0320	PAU_00255,PAU_00252	Ppb6_03239,Ppb6_03237	VY86_09640
*	B738_03457	Phpb_01309	PTE_02174	plu0361	PAU_00277	Ppb6_00032	VY86_10075
*	B738_03462	Phpb_01310	PTE_02173	plu0362	PAU_00278	Ppb6_00031	VY86_10080
*	B738_03482	Phpb_01313	PTE_02170	plu0365	PAU_00281	Ppb6_00028	VY86_10095
*	B738_03502	Phpb_01316	PTE_02167	plu0368	PAU_00284	Ppb6_00025	VY86_10110
*	B738_03507	Phpb_01317	PTE_02166	plu0369	PAU_00285	Ppb6_00024	VY86_10115
*	B738_03512	Phpb_01318	PTE_02165	plu0370	PAU_00286	Ppb6_00023	VY86_10120
*	B738_03517	Phpb_01319	PTE_02164	plu0371	PAU_00287	Ppb6_00022	VY86_10125
*	B738_03522	Phpb_01320	PTE_02163	plu0372	PAU_00288	Ppb6_00021	VY86_10130
*	B738_03527	Phpb_01321	PTE_02161	plu0373	PAU_00289	Ppb6_00020	VY86_10140
b4291	*	Phpb_04455	PTE_01331	plu4446	PAU_03941	Ppb6_04409	VY86_10160
*	B738_03642	Phpb_04374	PTE_01312	plu4545	PAU_04046	Ppb6_04325	VY86_10265
b3185	*	Phpb_04378	PTE_01308	plu4541	PAU_04042	Ppb6_04329	VY86_10285
b3183	*	Phpb_04379	PTE_01307	plu4540	PAU_04041	Ppb6_04330	VY86_10290
b3166	*	Phpb_04394	PTE_01291	plu4527	PAU_04027	Ppb6_04345	VY86_10365
*	B738_03797	Phpb_04402	PTE_01279	plu4516	PAU_04019	Ppb6_04353	VY86_10420
*	B738_03802	Phpb_04403	PTE_01278	plu4515	PAU_04018	Ppb6_04354	VY86_10425
*	B738_03832	Phpb_04406	PTE_01265	plu4512	PAU_04015	Ppb6_04356	VY86_10470
*	B738_03837	Phpb_04407	PTE_01264	plu4511	PAU_04014	Ppb6_04357	VY86_10475
*	B738_03842	Phpb_04408	PTE_01263	plu4510	PAU_04013	Ppb6_04358	VY86_10480
*	B738_03847	Phpb_04409	PTE_01262	plu4509	PAU_04012	Ppb6_04359	VY86_10485
*	B738_03852	Phpb_04410	PTE_01261	plu4508	PAU_04011	Ppb6_04360	VY86_10490
*	B738_03862	Phpb_04412	PTE_01259	plu4506	PAU_04009	Ppb6_04362	VY86_10500
b4237	B738_03892	*	PTE_01253	plu4500	PAU_04003	Ppb6_04368	VY86_10535
b4238	B738_03897	*	PTE_01252	plu4499	PAU_04002	Ppb6_04369	VY86_10540
b0273,b4254	*	Phpb_04422	PTE_01245	plu4490	PAU_03997	Ppb6_04374	VY86_10570
b1917	*	Phpb_04426	PTE_01240	plu4486	PAU_03992	Ppb6_04379	VY86_10600
b4259	*	Phpb_04430	PTE_01236	plu4482	PAU_03986	Ppb6_04383	VY86_10625
b4262	*	Phpb_04433	PTE_01233	plu4479	PAU_03983	Ppb6_04386	VY86_10640
*	B738_23493	Phpb_01743	PTE_02369	plu4319	PAU_03968	Ppb6_01517	VY86_10755
[truncated: 3,259 more rows]
