# Supplementary material for: Genome comparisons provide insights into the role of secondary metabolites in the pathogenic phase of the Photorhabdus life cycle
Source: BMC Genomics. 2016 Aug 3;17:537. doi: 10.1186/s12864-016-2862-4 (PMC4971723; doi:10.1186/s12864-016-2862-4)
Supplement: Additional file 3: — KO numbers for fully assembled genomes as assigned by the KAAS server. (XLSX 262 kb) [file 12864_2016_2862_MOESM3_ESM.xlsx]

## Sheet: Sheet1
Genome ID	KO number
WP_000135199.1	K02963
WP_000429386.1	K02110
WP_000831330.1	K02914
WP_001144069.1	K02970
WP_001181005.1	K02946
WP_002209449.1	K03563
WP_002211347.1	K02518
WP_002919257.1	K02948
WP_004240730.1	K10914
WP_004265123.1	K02902
WP_004847623.1	K04751
WP_006118955.1	K02916
WP_010847246.1	K03704
WP_010847629.1	K02913
WP_010847912.1	K03557
WP_011144452.1	K02114
WP_011144496.1	K00891
WP_011144665.1
WP_011144672.1	K03060
WP_011144683.1
WP_011144700.1	K12371
WP_011144704.1	K01821
WP_011144820.1	K02601
WP_011145490.1
WP_011145617.1	K09158
WP_011145878.1	K03674
WP_011146697.1
WP_011146885.1	K04764
WP_011146941.1	K07685
WP_011147003.1	K03704
WP_011147052.1	K02078
WP_011147057.1	K02911
WP_011147102.1	K18919
WP_011147563.1
WP_011147565.1
WP_011147586.1
WP_011147596.1	K01185
WP_011147612.1
WP_011147613.1	K06908
WP_011147627.1
WP_011147649.1
WP_011147653.1	K02315
WP_011147654.1
WP_011147655.1
WP_011147662.1
WP_011147992.1	K05839
WP_011148147.1	K02871
WP_011148251.1	K04078
WP_011148374.1
WP_011148633.1
WP_011148772.1	K03040
WP_011148774.1	K02952
WP_011148775.1	K03076
WP_011148777.1	K02907
WP_011148781.1	K02994
WP_011148786.1	K02961
WP_011148791.1	K02965
WP_012776389.1
WP_012777290.1	K03590
WP_012990148.1	K02996
WP_012990491.1	K02878
WP_013141641.1
WP_015833415.1	K03664
WP_015834820.1	K03408
WP_015835763.1	K05808
WP_015836102.1	K02956
WP_015836112.1	K02427
WP_015836118.1	K02899
WP_015836277.1	K02874
WP_015836279.1	K02982
WP_015836363.1
WP_015836364.1
WP_021322782.1	K13638
WP_021322783.1	K02879
WP_021322787.1	K02876
WP_021322788.1	K02988
WP_021322791.1	K02954
WP_021322792.1	K02931
WP_021322794.1	K02904
WP_021322795.1	K02886
WP_021322796.1	K02892
WP_021322797.1	K02926
WP_021322824.1
WP_021322826.1
WP_021322833.1	K00826
WP_021322843.1	K03530
WP_021322852.1	K03154
WP_021322885.1	K02867
WP_021322887.1	K03073
WP_021322890.1	K02950
WP_021322893.1
WP_021322895.1	K03745
WP_021322911.1	K01658
WP_021322928.1	K02686
WP_021322937.1	K03666
WP_021322959.1
WP_021322966.1	K07225
WP_021322971.1
WP_021322972.1	K19222
WP_021322987.1	K00350
WP_021322988.1	K00349
WP_021323015.1	K02887
WP_021323053.1	K06189
WP_021323061.1	K09710
WP_021323071.1	K03704
WP_021323081.1	K15974
WP_021323106.1	K01937
WP_021323144.1	K00760
WP_021323155.1	K10986
WP_021323157.1	K02081
WP_021323275.1	K11900
WP_021323277.1	K11903
WP_021323294.1	K07724
WP_021323298.1	K02888
WP_021323302.1	K03798
WP_021323312.1	K05803
WP_021323323.1
WP_021323324.1
WP_021323367.1	K07659
WP_021323370.1	K04760
WP_021323465.1	K03625
WP_021323478.1	K09767
WP_021323487.1	K07286
WP_021323511.1
WP_021323512.1	K12164
WP_021323513.1
WP_021323516.1
WP_021323517.1	K02433
WP_021323550.1	K03569
WP_021323566.1	K03270
WP_021323579.1	K03599
WP_021323587.1	K12961
WP_021323589.1	K06911
WP_021323613.1	K01252
WP_021323618.1	K07657
WP_021323772.1
WP_021323773.1	K04059
WP_021323784.1	K03227
WP_021323795.1	K04053
WP_021323815.1	K03768
WP_021323823.1	K02003
WP_021323825.1
WP_021323827.1
WP_021323839.1	K00939
WP_021323859.1	K05800
WP_021323860.1	K12500
WP_021323863.1	K03530
WP_021323870.1	K09954
WP_021323875.1	K02784
WP_021323902.1
WP_021323903.1	K04755
WP_021323918.1
WP_021323946.1	K03435
WP_021323947.1	K03925
WP_021324063.1	K02425
WP_021324066.1	K02422
WP_021324074.1	K02416
WP_021324077.1	K02420
WP_021324083.1
WP_021324088.1	K03071
WP_021324092.1	K09798
WP_021324103.1	K02527
WP_021324114.1	K05501
WP_021324116.1	K00989
WP_021324117.1
WP_021324144.1
WP_021324218.1
WP_021324254.1
WP_021324256.1	K06887
WP_021324262.1	K01826
WP_021324317.1	K03089
WP_021324325.1	K04085
WP_021324339.1	K11741
WP_021324340.1	K02356
WP_021324342.1
WP_021324395.1
WP_021324402.1	K09923
WP_021324405.1
WP_021324474.1
WP_021324482.1	K10763
WP_021324498.1	K03399
WP_021324500.1	K05936
WP_021324517.1
WP_021324527.1
WP_021324543.1	K02897
WP_021324574.1	K02342
WP_021324609.1	K02503
WP_021324638.1	K03784
WP_021324642.1	K03317
WP_021324647.1	K03789
WP_021324650.1
WP_021324651.1	K16841
WP_021324655.1	K00612
WP_021324684.1	K06995
WP_021324689.1
WP_021324706.1	K02822
WP_021324742.1	K06186
WP_021324798.1
WP_021324805.1
WP_021324817.1	K06142
WP_021324819.1	K02372
WP_021324919.1
WP_021325026.1	K02111
WP_021325027.1	K02113
WP_021325028.1	K02109
WP_021325055.1	K00425
WP_021325060.1	K00241
WP_021325086.1	K11103
WP_021325123.1	K00948
WP_021325124.1
WP_021325149.1	K11932
WP_021325190.1	K05788
WP_021325205.1
WP_021325215.1	K00384
WP_021325231.1
WP_021325247.1	K13651
WP_021325259.1
WP_021325264.1
WP_021325272.1
WP_021325288.1	K11107
WP_021325292.1
WP_021325310.1
WP_021325378.1	K07473
WP_021325395.1	K02440
WP_021325398.1	K02548
WP_021325403.1	K03764
WP_021325406.1	K00297
WP_021325445.1	K03113
WP_021325463.1	K00322
WP_021325464.1
WP_021325483.1
WP_021325497.1
WP_021325507.1	K03746
WP_021325511.1	K09858
WP_021325530.1
WP_021325533.1
WP_021325552.1	K03297
WP_021325591.1	K16074
WP_021325593.1	K11065
WP_021325598.1	K03970
WP_021325617.1
WP_021325624.1	K02426
WP_021325645.1
WP_021325667.1	K07171
WP_021325668.1
WP_021325676.1	K01834
WP_021325684.1
WP_021325722.1	K00331
WP_021325725.1	K14260
WP_021325726.1	K08722
WP_021325746.1	K03116
WP_021325754.1	K06193
WP_021325773.1
WP_021325780.1	K03189
WP_021325808.1	K09902
WP_021325817.1
WP_021325843.1
WP_021325892.1	K05785
WP_021325935.1
WP_021325967.1	K00769
WP_021325982.1	K02884
WP_021326045.1
WP_021326077.1	K03316
WP_021326104.1	K02403
WP_021326152.1	K03527
WP_021326192.1	K03840
WP_021326193.1	K04763
WP_021326334.1
WP_021326439.1	K03839
WP_021326460.1
WP_021326500.1	K07186
WP_021326537.1	K11179
WP_021326553.1	K07136
WP_021326557.1	K01159
WP_021326560.1	K09816
WP_021326740.1
WP_021326925.1
WP_023043314.1
WP_023043325.1	K06147
WP_023043329.1
WP_023043330.1	K07282
WP_023043331.1
WP_023043337.1
WP_023043363.1	K01653
WP_023043415.1	K09748
WP_023043435.1	K11895
WP_023043537.1	K03536
WP_023043542.1	K00372
WP_023043607.1	K03628
WP_023043738.1	K00681
WP_023043739.1	K03386
WP_023043756.1	K02297
WP_023043762.1	K03544
WP_023043781.1	K09973
WP_023043808.1
WP_023043907.1	K02986
WP_023043955.1
WP_023043956.1
WP_023043959.1
WP_023044018.1	K03573
WP_023044122.1	K01992
WP_023044129.1	K10985
WP_023044192.1	K00855
WP_023044239.1
WP_023044253.1	K09979
WP_023044257.1	K14061
WP_023044363.1	K02992
WP_023044500.1	K07339
WP_023044700.1
WP_023044746.1
WP_023044750.1	K15723
WP_023044753.1	K12410
WP_023044766.1	K03719
WP_023044830.1
WP_023044886.1
WP_023044887.1
WP_023044896.1
WP_023044944.1	K02115
WP_023044946.1	K03718
WP_023045092.1	K00121
WP_023045098.1
WP_023045152.1	K03088
WP_023045176.1
WP_023045177.1	K03611
WP_023045187.1	K00318
WP_023045188.1
WP_023045189.1
WP_023045403.1
WP_023045479.1	K09893
WP_023045486.1	K00339
WP_023045489.1	K00330
WP_023045584.1	K06077
WP_023045585.1	K06938
WP_023045610.1
WP_023045613.1	K03608
WP_023045644.1
WP_023045645.1
WP_023045646.1
WP_023045795.1
WP_023045957.1
WP_023046027.1
WP_023046290.1
WP_023046427.1
WP_023046435.1	K07458
WP_023046436.1
WP_023046451.1
WP_023046454.1
WP_023046484.1
WP_023046490.1	K02821
WP_023046557.1
WP_023046562.1
WP_023046798.1
WP_023046824.1	K18919
WP_024231476.1
WP_031280461.1	K00836
WP_031280498.1
WP_031280517.1	K08998
WP_031280631.1	K18843
WP_031280637.1	K15724
WP_031280853.1
WP_031281038.1
WP_031281420.1	K05809
WP_031281449.1
WP_031282008.1
WP_036768272.1
WP_036773792.1
WP_036777229.1
WP_036779464.1
WP_036779924.1
WP_036780168.1
WP_036812610.1
WP_036813627.1
WP_036833436.1
WP_036833619.1	K18610
WP_036833853.1	K02745
WP_036834328.1
WP_036834619.1	K11940
WP_036836775.1
WP_036836781.1
WP_036836823.1
WP_036836976.1	K07636
WP_036837167.1
WP_036837170.1
WP_036837271.1	K01146
WP_036837273.1	K12538
WP_036837274.1	K12537
WP_036837275.1	K12536
WP_036837280.1
WP_036837311.1
WP_036837345.1	K19337
WP_036837490.1	K02806
WP_036838203.1	K13643
WP_036838225.1
WP_036838473.1	K02072
WP_036838526.1
WP_036838530.1
WP_036838535.1
WP_036838575.1	K00240
WP_036838854.1	K01520
WP_036839032.1	K09910
WP_036839045.1	K02535
WP_036839288.1	K03293
WP_036839400.1
WP_036839403.1
WP_036839754.1	K07235
WP_036839875.1
WP_036840054.1
WP_036840064.1	K02006
WP_036840078.1	K05934
WP_036840080.1	K02189
WP_036840082.1	K02191
WP_036840084.1	K02188
WP_036840086.1	K06042
WP_036840088.1	K02227
WP_036840090.1
WP_036840092.1
WP_036840095.1
WP_036840097.1
WP_036840099.1
WP_036840102.1
WP_036840104.1
WP_036840106.1	K13655
WP_036840112.1	K02224
WP_036840254.1	K06204
WP_036840518.1	K09013
WP_036840887.1
WP_036840916.1	K00526
WP_036840922.1
WP_036841650.1
WP_036842421.1	K02300
WP_036842581.1	K03222
WP_036842753.1	K03531
WP_036843021.1
WP_036843602.1
WP_036843673.1
WP_036844572.1
WP_036844679.1	K09765
WP_036844852.1
WP_036845268.1	K02108
WP_036845497.1
WP_036846336.1
WP_036846519.1
WP_036846657.1	K03118
WP_036848061.1	K02009
WP_036848571.1	K09791
WP_036848977.1	K03413
WP_036849379.1
WP_036849495.1	K06078
WP_036849968.1	K07735
WP_036850009.1
WP_036850135.1	K02959
WP_036850612.1
WP_038194252.1
WP_038222694.1
WP_039877878.1
WP_039878491.1
WP_040149348.1
WP_040149365.1
WP_040153029.1
WP_041380257.1
WP_041381073.1
WP_046973458.1
WP_046973459.1
WP_046973460.1
WP_046973461.1
WP_046973462.1
WP_046973463.1
WP_046973464.1
WP_046973465.1
WP_046973466.1
WP_046973467.1
WP_046973468.1
WP_046973469.1
WP_046973471.1
WP_046973472.1
WP_046973473.1	K05526
WP_046973474.1	K01484
WP_046973475.1	K06447
WP_046973476.1	K00673
WP_046973477.1	K00840
WP_046973478.1
WP_046973479.1	K08195
WP_046973480.1
WP_046973481.1
WP_046973482.1
WP_046973483.1
WP_046973484.1
WP_046973485.1	K14155
WP_046973486.1	K02529
WP_046973487.1
WP_046973490.1
WP_046973491.1
WP_046973492.1
WP_046973493.1
WP_046973494.1
WP_046973495.1
WP_046973496.1	K15667
WP_046973497.1	K08195
WP_046973498.1	K11216
WP_046973499.1	K11531
WP_046973500.1	K08321
WP_046973501.1	K11530
WP_046973502.1
WP_046973503.1
WP_046973504.1
WP_046973505.1
WP_046973506.1
WP_046973507.1
WP_046973508.1	K11209
WP_046973509.1	K07071
WP_046973510.1	K00764
WP_046973511.1	K03558
WP_046973512.1	K03749
WP_046973513.1	K11754
WP_046973514.1	K01963
WP_046973515.1	K06173
WP_046973516.1
WP_046973517.1	K03473
WP_046973518.1
WP_046973519.1
WP_046973520.1	K07649
WP_046973521.1	K07774
WP_046973522.1
WP_046973523.1	K07794
WP_046973524.1	K07793
WP_046973525.1
WP_046973526.1	K00647
WP_046973527.1
WP_046973528.1	K15461
WP_046973529.1
WP_046973530.1	K09906
WP_046973531.1	K07090
WP_046973532.1	K01736
WP_046973533.1	K07320
WP_046973534.1	K16234
WP_046973535.1	K01745
WP_046973536.1	K01712
WP_046973537.1	K05836
WP_046973538.1	K01479
WP_046973539.1	K01468
WP_046973540.1
WP_046973541.1	K08296
WP_046973542.1	K01782
WP_046973543.1	K00632
WP_046973544.1	K06076
WP_046973545.1	K04754
WP_046973546.1	K00845
WP_046973547.1	K01885
WP_046973549.1	K11535
WP_046973550.1	K01972
WP_046973551.1	K03528
WP_046973552.1	K06203
WP_046973553.1	K01738
WP_046973554.1	K08483
WP_046973555.1	K02777
WP_046973556.1	K12339
WP_046973557.1	K02045
WP_046973558.1	K02047
WP_046973559.1	K02046
WP_046973560.1	K02048
WP_046973561.1
WP_046973562.1
WP_046973563.1	K00228
WP_046973564.1	K01401
WP_046973565.1	K03977
WP_046973566.1	K17713
WP_046973567.1
WP_046973568.1	K01892
WP_046973569.1	K03526
WP_046973570.1	K15539
WP_046973571.1
WP_046973572.1	K06941
WP_046973573.1	K00940
WP_046973574.1	K05367
WP_046973575.1	K06894
WP_046973576.1	K06897
WP_046973577.1
WP_046973578.1
WP_046973579.1
WP_046973580.1	K07751
WP_046973581.1	K04044
WP_046973582.1	K04082
WP_046973583.1	K13628
WP_046973584.1	K04488
WP_046973585.1	K04487
WP_046973586.1	K15396
WP_046973587.1	K01092
WP_046973588.1	K01226
WP_046973589.1	K02818
WP_046973590.1	K03485
WP_046973591.1	K05820
WP_046973592.1	K00600
WP_046973593.1	K05916
WP_046973594.1
WP_046973595.1
WP_046973596.1
WP_046973597.1	K07496
WP_046973598.1	K02529
WP_046973599.1	K03315
WP_046973600.1	K14155
WP_046973601.1	K09803
WP_046973602.1
WP_046973603.1
WP_046973604.1
WP_046973605.1
WP_046973606.1
WP_046973607.1
WP_046973608.1
WP_046973609.1
WP_046973610.1
WP_046973611.1
WP_046973612.1
WP_046973613.1
WP_046973614.1
WP_046973615.1
WP_046973616.1
WP_046973617.1
WP_046973618.1
WP_046973619.1
WP_046973620.1
WP_046973621.1
WP_046973622.1
WP_046973623.1
WP_046973624.1
WP_046973625.1
WP_046973626.1	K07389
WP_046973627.1
WP_046973628.1	K11004
WP_046973629.1	K11003
WP_046973630.1	K11004
WP_046973631.1
WP_046973632.1	K03711
WP_046973633.1	K12373
WP_046973635.1
WP_046973636.1	K01886
WP_046973637.1	K02804
WP_046973638.1	K02564
WP_046973639.1	K01443
WP_046973640.1	K02565
WP_046973641.1	K03184
WP_046973642.1	K06168
WP_046973643.1	K07042
WP_046973644.1	K03820
WP_046973645.1
WP_046973646.1	K10001
WP_046973647.1	K10003
WP_046973648.1	K10002
WP_046973649.1	K10004
WP_046973650.1	K01869
WP_046973651.1	K03643
WP_046973652.1	K02340
WP_046973653.1	K00969
WP_046973654.1	K00783
WP_046973655.1	K05515
WP_046973656.1	K05837
WP_046973657.1	K03642
WP_046973658.1	K07258
WP_046973659.1	K03801
WP_046973660.1	K06199
WP_046973661.1	K00567
WP_046973662.1	K06191
WP_046973663.1	K00526
WP_046973664.1	K02000
WP_046973665.1	K02001
WP_046973666.1	K02002
WP_046973667.1
WP_046973668.1
WP_046973669.1
WP_046973670.1	K03543
WP_046973671.1	K03446
WP_046973672.1	K03214
WP_046973673.1	K05812
WP_046973674.1	K09181
WP_046973675.1	K00998
WP_046973676.1	K03695
WP_046973677.1	K05810
WP_046973678.1	K06180
WP_046973679.1
WP_046973680.1	K14170
WP_046973681.1
WP_046973682.1	K14187
WP_046973683.1	K01626
WP_046973684.1	K00554
WP_046973685.1	K02860
WP_046973686.1	K03106
WP_046973687.1
WP_046973688.1
WP_046973689.1	K07173
WP_046973690.1	K01919
WP_046973691.1	K01872
WP_046973692.1	K03553
WP_046973693.1	K03743
WP_046973694.1	K05939
WP_046973695.1	K00891
WP_046973696.1	K00147
WP_046973697.1	K11750
WP_046973698.1	K01270
WP_046973699.1
WP_046973700.1	K19160
WP_046973702.1
WP_046973703.1
WP_046973704.1
WP_046973705.1
WP_046973706.1
WP_046973707.1
WP_046973708.1
WP_046973709.1
WP_046973710.1	K09961
WP_046973711.1
WP_046973712.1
WP_046973713.1
WP_046973714.1
WP_046973715.1
WP_046973717.1
WP_046973718.1
WP_046973719.1
WP_046973720.1
WP_046973721.1
WP_046973722.1	K09801
WP_046973723.1	K03631
WP_046973724.1	K00858
WP_046973725.1	K03687
WP_046973726.1	K03648
WP_046973727.1
WP_046973728.1
WP_046973729.1
WP_046973730.1
WP_046973731.1
WP_046973732.1
WP_046973733.1	K00997
WP_046973734.1	K03474
WP_046973735.1	K03584
WP_046973736.1	K03595
WP_046973737.1	K03685
WP_046973738.1	K03100
WP_046973739.1	K03803
WP_046973740.1	K03598
WP_046973741.1	K03597
WP_046973742.1	K03088
WP_046973743.1	K00278
WP_046973744.1	K05590
WP_046973745.1
WP_046973746.1
WP_046973747.1
WP_046973748.1
WP_046973749.1
WP_046973750.1	K03310
WP_046973751.1
WP_046973752.1	K16692
WP_046973753.1	K01104
WP_046973754.1	K01991
WP_046973755.1
WP_046973756.1
WP_046973757.1	K14744
WP_046973758.1
WP_046973759.1
WP_046973760.1
WP_046973761.1
WP_046973762.1
WP_046973763.1
WP_046973764.1
WP_046973765.1
WP_046973767.1
WP_046973768.1
WP_046973769.1
WP_046973770.1
WP_046973771.1	K03230
WP_046973772.1
WP_046973773.1
WP_046973774.1	K04058
WP_046973775.1	K03224
WP_046973776.1	K04056
WP_046973777.1	K03225
WP_046973778.1	K03226
WP_046973779.1	K03228
WP_046973780.1	K03229
WP_046973781.1
WP_046973782.1
WP_046973783.1
WP_046973784.1	K03219
WP_046973785.1	K03220
WP_046973786.1
WP_046973787.1	K03221
WP_046973788.1	K04051
WP_046973789.1	K04054
WP_046973790.1	K03223
WP_046973791.1	K03704
WP_046973792.1	K01034
WP_046973793.1
WP_046973794.1
WP_046973795.1	K01095
WP_046973796.1	K00946
WP_046973797.1	K00794
WP_046973798.1	K07738
WP_046973799.1	K03074
WP_046973800.1	K03072
WP_046973801.1	K03210
WP_046973802.1	K00773
WP_046973803.1	K07568
WP_046973804.1	K08682
WP_046973805.1	K03311
WP_046973806.1	K03547
WP_046973807.1	K03546
WP_046973808.1
WP_046973809.1
WP_046973810.1	K00216
WP_046973811.1	K02363
WP_046973812.1	K02361
WP_046973813.1
WP_046973814.1	K02014
WP_046973815.1	K02015
WP_046973816.1
WP_046973817.1	K08307
WP_046973818.1	K01069
WP_046973819.1
WP_046973820.1	K03469
WP_046973821.1
WP_046973822.1	K00615
WP_046973823.1
WP_046973824.1	K03472
WP_046973825.1	K00927
WP_046973826.1	K01624
WP_046973827.1	K01662
WP_046973828.1	K00795
WP_046973829.1
WP_046973830.1	K03151
WP_046973831.1	K00077
WP_046973832.1
WP_046973833.1	K02299
WP_046973834.1	K02298
WP_046973835.1
WP_046973836.1	K08218
WP_046973837.1	K05527
WP_046973838.1	K03545
WP_046973839.1
WP_046973840.1	K01358
WP_046973841.1	K01338
WP_046973842.1	K03770
WP_046973843.1	K02237
WP_046973844.1	K06920
WP_046973845.1	K01738
WP_046973846.1	K18889
WP_046973847.1	K18890
WP_046973848.1	K04752
WP_046973849.1	K03320
WP_046973850.1	K10805
WP_046973851.1	K09914
WP_046973852.1	K18138
WP_046973853.1	K03585
WP_046973854.1	K03577
WP_046973855.1	K16786
WP_046973856.1	K16785
WP_046973857.1
WP_046973858.1
WP_046973859.1
WP_046973860.1	K09706
WP_046973861.1	K04067
WP_046973862.1	K00759
WP_046973863.1	K02343
WP_046973864.1	K09747
WP_046973865.1	K06187
WP_046973866.1	K04079
WP_046973867.1	K01772
WP_046973868.1
WP_046973869.1	K00892
WP_046973870.1
WP_046973871.1
WP_046973872.1
WP_046973873.1
WP_046973874.1	K01607
WP_046973875.1	K00626
WP_046973876.1
WP_046973877.1
WP_046973878.1
WP_046973879.1
WP_046973880.1	K03455
WP_046973881.1	K08223
WP_046973882.1	K11751
WP_046973883.1	K03976
WP_046973884.1	K17686
WP_046973885.1	K11923
WP_046973886.1	K07340
WP_046973887.1	K05838
WP_046973888.1	K10804
WP_046973889.1	K02004
WP_046973890.1	K09018
WP_046973891.1
WP_046973892.1
WP_046973893.1	K00793
WP_046973894.1	K01589
WP_046973895.1	K01588
WP_046973896.1	K03269
WP_046973897.1	K01883
WP_046973898.1	K14761
WP_046973899.1	K01491
WP_046973900.1
WP_046973901.1
WP_046973902.1	K06919
WP_046973903.1	K06904
WP_046973904.1
WP_046973905.1
WP_046973906.1
WP_046973907.1
WP_046973908.1
WP_046973909.1
WP_046973910.1
WP_046973911.1
WP_046973912.1
WP_046973913.1
WP_046973915.1
WP_046973916.1
WP_046973917.1
WP_046973918.1
WP_046973919.1
WP_046973920.1
WP_046973921.1
WP_046973922.1
WP_046973923.1
WP_046973924.1	K11910
WP_046973925.1
WP_046973926.1
WP_046973927.1
WP_046973928.1
WP_046973929.1
WP_046973930.1
WP_046973931.1
WP_046973932.1
WP_046973933.1	K07496
WP_046973934.1
WP_046973935.1
WP_046973936.1
WP_046973937.1	K16087
WP_046973938.1
WP_046973939.1
WP_046973940.1
WP_046973941.1
WP_046973942.1	K03555
WP_046973943.1	K07496
WP_046973944.1	K03087
WP_046973945.1	K06194
WP_046973946.1	K00573
WP_046973947.1	K03787
WP_046973948.1	K06176
WP_046973949.1	K01770
WP_046973950.1	K00991
WP_046973951.1	K05589
WP_046973952.1	K00956
WP_046973953.1	K00957
WP_046973954.1	K02302
WP_046973955.1	K01467
WP_046973956.1	K16371
WP_046973957.1	K02082
WP_046973958.1
WP_046973959.1	K08302
WP_046973960.1	K01611
WP_046973961.1	K00797
WP_046973962.1
WP_046973963.1
WP_046973964.1
WP_046973965.1
WP_046973966.1
WP_046973967.1	K18841
WP_046973968.1
WP_046973969.1	K01673
WP_046973970.1	K01990
WP_046973971.1	K01579
WP_046973972.1	K01918
WP_046973973.1	K00606
WP_046973974.1	K00950
WP_046973975.1	K00970
WP_046973976.1	K01894
WP_046973977.1	K06206
WP_046973978.1	K03579
WP_046973979.1	K05365
WP_046973980.1	K01673
WP_046973981.1
WP_046973982.1	K18828
WP_046973983.1
WP_046973984.1
WP_046973985.1	K01845
WP_046973986.1
WP_046973989.1	K01243
WP_046973990.1	K01129
WP_046973991.1	K07678
WP_046973992.1	K00951
WP_046973993.1	K04765
WP_046973994.1
WP_046973995.1
WP_046973996.1
WP_046973997.1	K01689
WP_046973998.1	K14445
WP_046973999.1
WP_046974000.1
WP_046974001.1	K07012
WP_046974002.1	K19123
WP_046974003.1
WP_046974004.1	K19124
WP_046974005.1	K19125
WP_046974006.1	K19126
WP_046974007.1
WP_046974008.1
WP_046974009.1
WP_046974010.1
WP_046974011.1
WP_046974012.1
WP_046974013.1
WP_046974014.1
WP_046974015.1
WP_046974016.1
WP_046974017.1
WP_046974018.1
WP_046974019.1
WP_046974020.1
WP_046974021.1
WP_046974022.1
WP_046974023.1
WP_046974024.1
WP_046974025.1
WP_046974026.1
WP_046974027.1
WP_046974028.1
WP_046974029.1
WP_046974030.1	K01814
WP_046974031.1
WP_046974032.1	K00127
WP_046974033.1	K00124
WP_046974034.1
WP_046974035.1
WP_046974036.1	K01667
WP_046974037.1	K03835
WP_046974038.1
WP_046974039.1
WP_046974040.1	K15654
WP_046974041.1	K06160
WP_046974042.1	K02010
WP_046974043.1	K02011
WP_046974044.1	K02012
WP_046974045.1	K07783
WP_046974046.1	K07675
WP_046974047.1	K07686
WP_046974048.1	K00390
WP_046974049.1	K00381
WP_046974050.1	K00380
WP_046974051.1	K01737
WP_046974052.1	K16234
WP_046974053.1
WP_046974054.1	K03273
WP_046974055.1	K02071
WP_046974056.1	K02073
WP_046974057.1	K06080
WP_046974058.1
WP_046974059.1	K01881
WP_046974060.1	K06079
WP_046974061.1	K19000
WP_046974062.1
WP_046974063.1
WP_046974064.1
WP_046974065.1
WP_046974066.1
WP_046974067.1	K04075
WP_046974068.1	K01962
WP_046974069.1	K02337
WP_046974070.1	K03470
WP_046974071.1	K00748
WP_046974072.1	K00677
WP_046974073.1	K02536
WP_046974074.1	K11749
WP_046974075.1	K00981
WP_046974076.1	K00099
WP_046974077.1	K02838
WP_046974078.1	K09903
WP_046974079.1	K02357
WP_046974080.1	K02967
WP_046974081.1	K01265
WP_046974082.1	K00990
WP_046974083.1	K00674
WP_046974084.1
WP_046974085.1	K06175
WP_046974086.1	K06879
WP_046974087.1	K06966
WP_046974088.1	K01406
WP_046974089.1	K06968
WP_046974090.1
WP_046974091.1	K03566
WP_046974092.1	K01766
WP_046974093.1	K02426
WP_046974094.1
WP_046974095.1	K08304
WP_046974096.1	K01448
WP_046974097.1	K14682
WP_046974098.1	K06147
WP_046974099.1
WP_046974100.1	K12242
WP_046974101.1	K12241
WP_046974102.1
WP_046974103.1	K02014
WP_046974104.1	K03581
WP_046974105.1	K03582
WP_046974106.1	K01407
WP_046974107.1	K03583
WP_046974108.1
WP_046974109.1	K02680
WP_046974110.1	K02679
WP_046974111.1
WP_046974112.1	K00560
WP_046974113.1	K13292
WP_046974114.1	K08484
WP_046974115.1	K08311
WP_046974116.1	K02064
WP_046974117.1	K02063
WP_046974118.1	K02062
WP_046974119.1
WP_046974120.1
WP_046974121.1	K07088
WP_046974122.1	K02336
WP_046974123.1	K03580
WP_046974124.1	K06177
WP_046974125.1	K05801
WP_046974126.1	K04744
WP_046974127.1	K03771
WP_046974128.1	K00097
WP_046974129.1	K02528
WP_046974130.1	K06195
WP_046974131.1	K01525
WP_046974132.1	K00287
WP_046974133.1
WP_046974134.1	K01955
WP_046974135.1	K01956
WP_046974136.1	K00215
WP_046974137.1	K03774
WP_046974138.1	K03101
WP_046974139.1	K01870
WP_046974140.1	K11753
WP_046974141.1	K02968
WP_046974142.1	K03313
WP_046974143.1	K02757
WP_046974144.1	K03488
WP_046974145.1	K01223
WP_046974146.1	K03686
WP_046974147.1	K04043
WP_046974148.1	K07034
WP_046974149.1
WP_046974150.1
WP_046974151.1	K00849
WP_046974152.1
WP_046974153.1
WP_046974154.1
WP_046974155.1	K01239
WP_046974156.1	K09471
WP_046974157.1	K00146
WP_046974158.1
WP_046974159.1
WP_046974160.1
WP_046974161.1
WP_046974162.1
WP_046974163.1
WP_046974164.1
WP_046974165.1
WP_046974166.1
WP_046974167.1	K01077
WP_046974168.1
WP_046974169.1	K15980
WP_046974170.1	K07493
WP_046974171.1
WP_046974172.1
WP_046974173.1	K07552
WP_046974174.1	K00564
WP_046974175.1	K02344
WP_046974176.1	K02837
WP_046974177.1	K04065
WP_046974178.1
WP_046974179.1	K03424
WP_046974180.1	K01619
WP_046974181.1	K00758
WP_046974182.1	K01839
WP_046974183.1	K01758
WP_046974184.1	K01697
WP_046974185.1	K01079
WP_046974186.1	K04485
WP_046974187.1	K06211
WP_046974188.1
WP_046974189.1	K08309
WP_046974190.1	K03720
WP_046974191.1
WP_046974192.1	K15634
WP_046974193.1	K05804
WP_046974194.1	K07773
WP_046974195.1	K00872
WP_046974196.1	K01733
WP_046974197.1
WP_046974198.1	K09861
WP_046974199.1
WP_046974200.1	K00616
WP_046974201.1	K03831
WP_046974202.1
WP_046974203.1	K01462
WP_046974204.1	K05539
WP_046974205.1	K00344
WP_046974206.1	K02314
WP_046974207.1	K01775
WP_046974208.1	K00832
WP_046974209.1
WP_046974210.1
WP_046974211.1
WP_046974212.1
WP_046974213.1	K16328
WP_046974214.1	K16329
WP_046974215.1	K03701
WP_046974216.1	K03111
WP_046974217.1	K13641
WP_046974218.1
WP_046974219.1
WP_046974220.1
WP_046974221.1
WP_046974222.1
WP_046974223.1	K00928
WP_046974224.1	K01810
WP_046974225.1	K03181
WP_046974226.1	K00631
WP_046974227.1	K00901
WP_046974228.1	K01356
WP_046974229.1	K09823
WP_046974230.1
WP_046974231.1
WP_046974232.1	K00906
WP_046974233.1	K01637
WP_046974234.1	K01638
WP_046974235.1	K00651
WP_046974236.1	K00602
WP_046974237.1	K01945
WP_046974238.1
WP_046974239.1	K09891
WP_046974240.1	K05982
WP_046974241.1	K01599
WP_046974242.1
WP_046974243.1	K03147
WP_046974244.1	K00788
WP_046974245.1	K03148
WP_046974246.1	K03149
WP_046974247.1
WP_046974248.1	K09702
WP_046974249.1
WP_046974250.1
WP_046974251.1	K00004
WP_046974252.1
WP_046974253.1	K08163
WP_046974254.1	K03556
WP_046974255.1	K00688
WP_046974256.1	K00705
WP_046974257.1	K19158
WP_046974258.1	K19159
WP_046974259.1
WP_046974260.1
WP_046974261.1	K10110
WP_046974262.1	K10109
WP_046974263.1	K10108
WP_046974264.1	K10111
WP_046974265.1	K02024
WP_046974266.1	K05775
WP_046974267.1	K02840
WP_046974268.1
WP_046974269.1
WP_046974270.1
WP_046974271.1
WP_046974272.1
WP_046974273.1
WP_046974274.1
WP_046974275.1
WP_046974276.1	K03046
WP_046974277.1	K03043
WP_046974278.1	K02935
WP_046974279.1	K02864
WP_046974280.1	K02863
WP_046974281.1	K02358
WP_046974282.1	K02355
WP_046974283.1	K07237
WP_046974284.1	K07236
WP_046974285.1	K03772
WP_046974286.1	K03775
WP_046974287.1	K07070
WP_046974288.1	K11747
WP_046974289.1	K11748
WP_046974290.1	K06158
WP_046974291.1
WP_046974292.1
WP_046974293.1
WP_046974294.1
WP_046974295.1
WP_046974296.1
WP_046974297.1
WP_046974298.1
WP_046974299.1
WP_046974300.1
WP_046974301.1	K06887
WP_046974302.1	K07106
WP_046974303.1	K11192
WP_046974304.1
WP_046974305.1	K07019
WP_046974306.1	K07397
WP_046974307.1	K00821
WP_046974308.1	K03767
WP_046974309.1	K02335
WP_046974310.1	K03673
WP_046974311.1	K03752
WP_046974312.1	K03753
WP_046974313.1	K01082
WP_046974314.1	K03773
WP_046974315.1
WP_046974316.1
WP_046974317.1
WP_046974318.1	K00612
WP_046974319.1
WP_046974320.1
WP_046974321.1	K02939
WP_046974322.1	K02990
WP_046974323.1	K13771
WP_046974324.1	K04087
WP_046974325.1	K04088
WP_046974326.1	K03665
WP_046974327.1	K00791
WP_046974328.1	K03572
WP_046974329.1	K01448
WP_046974330.1	K06925
WP_046974331.1	K13288
WP_046974332.1	K06949
WP_046974333.1	K01613
WP_046974334.1	K05802
WP_046974335.1
WP_046974336.1
WP_046974337.1
WP_046974338.1
WP_046974339.1
WP_046974340.1
WP_046974341.1
WP_046974342.1
WP_046974343.1
WP_046974344.1	K07024
WP_046974345.1	K03654
WP_046974346.1
WP_046974347.1	K05786
WP_046974348.1
WP_046974349.1
WP_046974350.1	K03284
WP_046974351.1	K03657
WP_046974352.1	K07025
WP_046974353.1	K03733
WP_046974354.1	K09921
WP_046974355.1	K01778
WP_046974356.1
WP_046974357.1	K06202
WP_046974358.1	K05851
WP_046974359.1	K01749
WP_046974360.1	K01719
WP_046974361.1	K02496
WP_046974362.1	K02498
WP_046974363.1
WP_046974364.1	K02852
WP_046974365.1	K02853
WP_046974366.1	K12582
WP_046974367.1	K16693
WP_046974368.1	K02805
WP_046974369.1	K16704
WP_046974370.1	K00973
WP_046974371.1	K01710
WP_046974372.1	K02472
WP_046974373.1	K01791
WP_046974374.1	K05790
WP_046974375.1	K02851
WP_046974376.1	K03671
WP_046974377.1	K03732
WP_046974378.1	K03656
WP_046974379.1	K00053
WP_046974380.1	K02521
WP_046974381.1
WP_046974382.1	K07222
WP_046974383.1
WP_046974384.1	K04487
WP_046974385.1
WP_046974386.1
WP_046974387.1	K00059
WP_046974388.1	K03543
WP_046974389.1
WP_046974390.1	K01754
WP_046974391.1	K01687
WP_046974392.1	K11258
WP_046974393.1	K01652
WP_046974394.1	K07391
WP_046974395.1	K09897
WP_046974396.1
WP_046974397.1
WP_046974398.1
WP_046974399.1	K00014
WP_046974400.1	K07566
WP_046974401.1	K07479
WP_046974402.1	K04096
WP_046974403.1	K01462
WP_046974404.1	K00604
WP_046974405.1	K03500
WP_046974406.1	K03499
WP_046974407.1	K09890
WP_046974408.1	K02881
WP_046974409.1	K02933
WP_046974410.1	K02895
WP_046974411.1	K02890
WP_046974412.1	K02906
WP_046974413.1	K03594
WP_046974414.1	K02358
WP_046974415.1	K00867
WP_046974416.1	K03524
WP_046974417.1	K00075
WP_046974418.1	K01776
WP_046974419.1	K16092
WP_046974420.1	K00557
WP_046974421.1	K04761
WP_046974422.1	K01755
WP_046974423.1	K01940
WP_046974424.1	K00930
WP_046974425.1	K00145
WP_046974426.1	K01438
WP_046974427.1	K01595
WP_046974428.1
WP_046974430.1
WP_046974432.1
WP_046974433.1	K12525
WP_046974434.1	K01739
WP_046974435.1	K02909
WP_046974436.1	K04066
WP_046974437.1	K05499
WP_046974438.1	K03591
WP_046974439.1	K01419
WP_046974440.1	K03667
WP_046974441.1	K02553
WP_046974442.1	K09892
WP_046974443.1	K00864
WP_046974444.1	K00528
WP_046974445.1
WP_046974446.1
WP_046974447.1	K01803
WP_046974448.1	K02048
WP_046974449.1	K00850
WP_046974450.1	K00981
WP_046974451.1
WP_046974452.1
WP_046974453.1
WP_046974454.1
WP_046974455.1
WP_046974456.1
WP_046974457.1
WP_046974458.1
WP_046974459.1
WP_046974460.1
WP_046974461.1	K06906
WP_046974463.1
WP_046974464.1
WP_046974465.1	K06908
WP_046974466.1
WP_046974467.1
WP_046974468.1
WP_046974469.1
WP_046974470.1
WP_046974471.1
WP_046974472.1	K06903
WP_046974473.1
WP_046974474.1
WP_046974475.1
WP_046974476.1
WP_046974477.1
WP_046974478.1
WP_046974479.1
WP_046974480.1
WP_046974481.1
WP_046974482.1
WP_046974483.1
WP_046974484.1
WP_046974485.1	K06223
WP_046974487.1
WP_046974488.1
WP_046974489.1
WP_046974490.1
WP_046974491.1	K06006
WP_046974492.1	K07662
WP_046974493.1	K07640
WP_046974494.1	K13015
WP_046974495.1
WP_046974496.1	K13018
WP_046974497.1	K13017
WP_046974498.1
WP_046974499.1
WP_046974500.1
WP_046974501.1
WP_046974502.1	K13019
WP_046974503.1
WP_046974505.1
WP_046974506.1
WP_046974507.1
WP_046974508.1
WP_046974509.1
WP_046974510.1
WP_046974511.1	K19429
WP_046974512.1	K00983
WP_046974513.1	K08068
WP_046974514.1
WP_046974517.1
WP_046974518.1
WP_046974519.1	K02501
WP_046974520.1	K02500
WP_046974521.1	K17716
WP_046974522.1	K19068
WP_046974523.1	K01791
WP_046974524.1
WP_046974525.1
WP_046974526.1
WP_046974527.1	K03216
WP_046974528.1	K00640
WP_046974529.1	K00057
WP_046974530.1
WP_046974531.1	K00060
WP_046974532.1	K00639
WP_046974533.1	K03274
WP_046974534.1	K02843
WP_046974535.1	K02841
WP_046974536.1	K07270
WP_046974537.1
WP_046974538.1
WP_046974539.1
WP_046974540.1	K02844
WP_046974541.1	K02849
WP_046974542.1	K12984
WP_046974543.1	K00954
WP_046974544.1	K10563
WP_046974545.1
WP_046974546.1
WP_046974547.1
WP_046974548.1
WP_046974549.1	K13038
WP_046974550.1	K00762
WP_046974551.1
WP_046974552.1
WP_046974553.1
WP_046974554.1
WP_046974555.1
WP_046974556.1	K03833
WP_046974557.1	K01042
WP_046974558.1	K02380
WP_046974559.1
WP_046974560.1
WP_046974561.1
WP_046974562.1
WP_046974563.1	K00123
WP_046974564.1
WP_046974565.1	K03650
WP_046974566.1	K03217
WP_046974567.1	K02313
WP_046974568.1	K02338
WP_046974569.1	K03629
WP_046974570.1	K02470
WP_046974571.1	K06887
WP_046974572.1
WP_046974573.1
WP_046974575.1	K00133
WP_046974577.1
WP_046974578.1	K02919
WP_046974579.1	K00820
WP_046974580.1	K04042
WP_046974581.1	K02112
WP_046974582.1	K02116
WP_046974583.1	K03501
WP_046974584.1	K03495
WP_046974585.1	K06205
WP_046974586.1	K01914
WP_046974587.1
WP_046974588.1	K03924
WP_046974589.1	K06726
WP_046974590.1	K10441
WP_046974591.1	K10440
WP_046974592.1	K10439
WP_046974593.1	K00852
WP_046974594.1
WP_046974595.1
WP_046974596.1
WP_046974597.1	K14393
WP_046974598.1	K01895
WP_046974599.1	K04564
WP_046974600.1
WP_046974601.1	K03088
WP_046974602.1
WP_046974603.1
WP_046974604.1	K09930
WP_046974605.1
WP_046974606.1	K01962
WP_046974607.1	K01867
WP_046974608.1	K01091
WP_046974609.1	K01783
WP_046974610.1	K06223
WP_046974611.1	K03112
WP_046974612.1	K01735
WP_046974613.1	K02507
WP_046974614.1
WP_046974615.1
WP_046974616.1	K12288
WP_046974617.1	K05366
WP_046974618.1	K08312
WP_046974619.1
WP_046974620.1	K04762
WP_046974621.1	K04083
WP_046974622.1	K07487
WP_046974623.1	K07491
WP_046974624.1	K01610
WP_046974625.1	K06911
WP_046974626.1
WP_046974627.1	K14987
WP_046974628.1
WP_046974629.1
WP_046974630.1
WP_046974631.1
WP_046974632.1
WP_046974633.1	K11921
WP_046974634.1	K01725
WP_046974636.1
WP_046974637.1
WP_046974638.1
WP_046974639.1
WP_046974640.1
WP_046974641.1	K07007
WP_046974642.1	K16322
WP_046974643.1	K06144
WP_046974644.1
WP_046974645.1
WP_046974646.1	K06149
WP_046974647.1	K00262
WP_046974648.1	K15984
WP_046974649.1	K01414
WP_046974650.1
WP_046974651.1
WP_046974652.1
WP_046974653.1
WP_046974654.1
WP_046974655.1	K06946
WP_046974656.1
WP_046974657.1
WP_046974658.1
WP_046974659.1
WP_046974660.1
WP_046974661.1	K03630
WP_046974662.1	K18838
WP_046974663.1	K18837
WP_046974664.1
WP_046974665.1
WP_046974666.1
WP_046974667.1
WP_046974668.1	K07043
WP_046974669.1	K01153
WP_046974670.1
WP_046974671.1
WP_046974672.1
WP_046974673.1
WP_046974674.1
WP_046974675.1	K00613
WP_046974676.1
WP_046974677.1
WP_046974678.1
WP_046974679.1
WP_046974680.1	K00638
WP_046974681.1	K01493
WP_046974682.1
WP_046974683.1	K01686
WP_046974684.1	K13637
WP_046974685.1
WP_046974686.1
WP_046974687.1
WP_046974688.1	K00040
WP_046974689.1	K00874
WP_046974690.1	K01625
WP_046974691.1
WP_046974692.1
WP_046974693.1
WP_046974694.1	K00111
WP_046974695.1	K02444
WP_046974696.1	K02441
WP_046974697.1	K02439
WP_046974698.1	K07400
WP_046974699.1
WP_046974700.1	K02170
WP_046974701.1
WP_046974702.1
WP_046974703.1
WP_046974704.1
WP_046974705.1	K07490
WP_046974706.1	K04759
WP_046974707.1	K04758
WP_046974708.1	K06959
WP_046974709.1
WP_046974710.1
WP_046974711.1	K07746
WP_046974712.1
WP_046974713.1
WP_046974714.1
WP_046974715.1	K07638
WP_046974716.1	K02040
WP_046974717.1	K02037
WP_046974718.1	K02038
WP_046974719.1	K02036
WP_046974720.1	K02039
WP_046974721.1	K02030
WP_046974722.1	K02029
WP_046974723.1	K02029
WP_046974724.1	K07494
WP_046974725.1
WP_046974726.1	K09894
WP_046974727.1
WP_046974728.1	K02495
WP_046974729.1	K01620
WP_046974730.1
WP_046974731.1
WP_046974732.1	K07708
WP_046974733.1	K01915
WP_046974734.1	K06207
WP_046974735.1
WP_046974736.1	K06200
WP_046974737.1	K07025
WP_046974738.1	K07560
WP_046974739.1
WP_046974740.1
WP_046974741.1
WP_046974742.1	K07491
WP_046974743.1
WP_046974744.1	K03312
WP_046974745.1	K07334
WP_046974746.1
WP_046974747.1
WP_046974748.1	K18918
WP_046974749.1
WP_046974750.1
WP_046974751.1
WP_046974752.1
WP_046974753.1	K03655
WP_046974754.1	K07357
WP_046974755.1
WP_046974756.1
WP_046974757.1
WP_046974758.1
WP_046974759.1
WP_046974761.1
WP_046974762.1
WP_046974763.1
WP_046974764.1	K01139
WP_046974765.1	K00942
WP_046974766.1
WP_046974767.1
WP_046974768.1
WP_046974769.1
WP_046974770.1
WP_046974771.1
WP_046974772.1	K01972
WP_046974773.1
WP_046974774.1
WP_046974775.1
WP_046974776.1	K00835
WP_046974777.1	K01246
WP_046974778.1	K01878
WP_046974779.1	K01879
WP_046974780.1	K19157
WP_046974782.1
WP_046974783.1
WP_046974784.1
WP_046974785.1	K12368
WP_046974786.1	K12369
WP_046974787.1	K12370
WP_046974788.1	K12372
WP_046974789.1
WP_046974790.1	K07058
WP_046974791.1
WP_046974792.1
WP_046974793.1
WP_046974794.1
WP_046974795.1
WP_046974796.1
WP_046974797.1	K01953
WP_046974798.1
WP_046974799.1
WP_046974800.1
WP_046974801.1	K07782
WP_046974802.1	K14155
WP_046974803.1	K01455
WP_046974804.1
WP_046974805.1
WP_046974806.1
WP_046974807.1
WP_046974808.1
WP_046974809.1
WP_046974810.1
WP_046974811.1
WP_046974812.1
WP_046974813.1
WP_046974814.1
WP_046974815.1
WP_046974816.1
WP_046974817.1
WP_046974818.1	K04763
WP_046974819.1
WP_046974820.1	K19048
WP_046974821.1
WP_046974822.1
WP_046974823.1
WP_046974824.1	K11904
WP_046974825.1
WP_046974826.1	K11891
WP_046974827.1	K00558
WP_046974828.1
WP_046974829.1
WP_046974830.1
WP_046974831.1
WP_046974832.1
WP_046974833.1
WP_046974834.1	K11891
WP_046974835.1
WP_046974836.1
WP_046974837.1
WP_046974838.1	K03696
WP_046974839.1	K11893
WP_046974840.1	K11913
WP_046974841.1	K11896
WP_046974842.1	K11905
WP_046974843.1	K11901
WP_046974844.1
WP_046974845.1	K07115
WP_046974846.1	K00383
WP_046974847.1
WP_046974848.1	K16091
WP_046974849.1	K07165
WP_046974850.1	K03088
WP_046974851.1	K07109
WP_046974852.1
WP_046974853.1	K07304
WP_046974854.1	K07278
WP_046974855.1	K09800
WP_046974856.1
WP_046974857.1	K01507
WP_046974858.1
WP_046974860.1
WP_046974861.1
WP_046974862.1
WP_046974863.1	K03841
WP_046974864.1	K02558
WP_046974865.1	K03402
WP_046974866.1	K00024
WP_046974867.1
WP_046974868.1
WP_046974869.1	K02523
WP_046974870.1	K03979
WP_046974871.1	K07259
WP_046974872.1	K03624
WP_046974873.1	K07574
WP_046974874.1	K00796
WP_046974875.1	K03431
WP_046974876.1	K03075
WP_046974877.1	K02600
WP_046974878.1	K02519
WP_046974879.1	K02834
WP_046974880.1	K03177
WP_046974881.1	K00962
WP_046974882.1	K05592
WP_046974883.1
WP_046974884.1	K06200
WP_046974885.1	K07496
WP_046974886.1	K01993
WP_046974887.1	K01992
WP_046974888.1	K01992
WP_046974889.1
WP_046974890.1
WP_046974891.1
WP_046974892.1
WP_046974893.1
WP_046974894.1
WP_046974895.1
WP_046974896.1
WP_046974897.1	K01007
WP_046974898.1	K03179
WP_046974899.1	K07496
WP_046974900.1	K03824
WP_046974901.1	K07461
WP_046974902.1	K12151
WP_046974903.1	K04068
WP_046974904.1	K00527
WP_046974905.1	K09022
WP_046974906.1	K00610
WP_046974907.1
WP_046974908.1	K00609
WP_046974909.1	K00611
WP_046974910.1
WP_046974911.1
WP_046974912.1
WP_046974913.1	K02424
WP_046974914.1	K10010
WP_046974915.1	K10009
WP_046974916.1	K02424
WP_046974917.1
WP_046974918.1	K01873
WP_046974919.1	K02339
WP_046974920.1	K01255
WP_046974921.1	K07091
WP_046974922.1	K11720
WP_046974923.1	K18988
WP_046974924.1
WP_046974925.1	K07724
WP_046974926.1
WP_046974927.1
WP_046974928.1
WP_046974929.1
WP_046974930.1
WP_046974931.1
WP_046974932.1
WP_046974933.1
WP_046974934.1
WP_046974935.1	K01154
WP_046974936.1	K03427
WP_046974937.1	K07454
WP_046974938.1
WP_046974939.1	K07074
WP_046974940.1	K14415
WP_046974941.1
WP_046974942.1
WP_046974943.1
WP_046974944.1	K07160
WP_046974945.1
WP_046974946.1
WP_046974947.1	K01070
WP_046974948.1
WP_046974949.1
WP_046974950.1
WP_046974951.1	K12975
WP_046974952.1	K07090
WP_046974953.1	K07496
WP_046974954.1	K07491
WP_046974955.1	K03576
WP_046974956.1
WP_046974957.1	K01304
WP_046974958.1	K00757
WP_046974959.1	K01104
WP_046974960.1
WP_046974961.1	K09760
WP_046974962.1	K03183
WP_046974963.1	K03690
WP_046974964.1	K03688
WP_046974965.1	K03117
WP_046974966.1	K01698
WP_046974967.1	K05995
WP_046974968.1	K03182
WP_046974969.1	K05368
WP_046974970.1	K00632
WP_046974971.1	K01825
WP_046974972.1	K01271
WP_046974973.1
WP_046974974.1	K03498
WP_046974975.1	K00230
WP_046974976.1	K07484
WP_046974977.1	K06145
WP_046974978.1	K00851
WP_046974979.1	K06156
WP_046974980.1
WP_046974981.1
WP_046974982.1	K09795
WP_046974983.1
WP_046974984.1	K03796
WP_046974985.1
WP_046974986.1	K07347
WP_046974987.1
WP_046974988.1
WP_046974989.1
WP_046974990.1
WP_046974991.1
WP_046974992.1	K05782
WP_046974993.1
WP_046974994.1
WP_046974995.1
WP_046974996.1
WP_046974997.1
WP_046974998.1
WP_046974999.1
WP_046975000.1
WP_046975001.1
WP_046975002.1
WP_046975003.1	K07763
WP_046975004.1
WP_046975005.1
WP_046975006.1
WP_046975007.1
WP_046975008.1
WP_046975009.1
WP_046975010.1
WP_046975011.1
WP_046975012.1	K07130
WP_046975013.1
WP_046975014.1
WP_046975015.1
WP_046975016.1
WP_046975017.1
WP_046975018.1
WP_046975019.1
[truncated: 11,239 more rows]
