# Supplementary material for: Genome comparisons provide insights into the role of secondary metabolites in the pathogenic phase of the Photorhabdus life cycle
Source: BMC Genomics. 2016 Aug 3;17:537. doi: 10.1186/s12864-016-2862-4 (PMC4971723; doi:10.1186/s12864-016-2862-4)
Supplement: Additional file 4: — KEGG pathway analysis. Numbers indicate number of CDS with matching KO numbers in each pathway. (XLSX 15 kb) [file 12864_2016_2862_MOESM4_ESM.xlsx]

## Sheet: New Supp Table 2 - Pathway anal
Metabolic pathway	P. thracensis DSM 15199	P. luminescens TTO1	P. asymbiotica ATCC 43949
01200_Carbon_metabolism	87	84	87
01210_2-Oxocarboxylic_acid_metabolism	24	24	23
01212_Fatty_acid_metabolism	19	19	20
01230_Biosynthesis_of_amino_acids	105	105	101
01220_Degradation_of_aromatic_compounds	20	20	23
00010_Glycolysis_/_Gluconeogenesis	26	28	28
00020_Citrate_cycle	22	22	22
00030_Pentose_phosphate_pathway	21	20	20
00040_Pentose_and_glucuronate_interconversions	9	10	9
00051_Fructose_and_mannose_metabolism	12	12	14
00052_Galactose_metabolism	13	14	13
00053_Ascorbate_and_aldarate_metabolism	5	5	5
00500_Starch_and_sucrose_metabolism	11	13	13
00520_Amino_sugar_and_nucleotide_sugar_metabolism	40	37	40
00620_Pyruvate_metabolism	36	35	37
00630_Glyoxylate_and_dicarboxylate_metabolism	26	25	27
00640_Propanoate_metabolism	29	28	32
00650_Butanoate_metabolism	22	21	23
00660_C5-Branched_dibasic_acid_metabolism	8	8	8
00562_Inositol_phosphate_metabolism	8	9	9
00190_Oxidative_phosphorylation	39	39	39
00195_Photosynthesis	8	8	8
00710_Carbon_fixation_in_photosynthetic_organisms	14	14	14
00720_Carbon_fixation_pathways_in_prokaryotes	28	26	28
00680_Methane_metabolism	23	22	22
00910_Nitrogen_metabolism	8	7	8
00920_Sulfur_metabolism	21	19	20
00061_Fatty_acid_biosynthesis	14	14	14
00071_Fatty_acid_degradation	12	12	14
00561_Glycerolipid_metabolism	9	9	9
00564_Glycerophospholipid_metabolism	18	19	19
00600_Sphingolipid_metabolism	NA	1	1
00592_alpha-Linolenic_acid_metabolism	1	2	2
01040_Biosynthesis_of_unsaturated_fatty_acids	6	7	7
00230_Purine_metabolism	65	64	65
00240_Pyrimidine_metabolism	53	51	53
00250_Alanine_aspartate_and_glutamate_metabolism	25	25	26
00260_Glycine_serine_and_threonine_metabolism	32	33	32
00270_Cysteine_and_methionine_metabolism	30	29	29
00280_Valine_leucine_and_isoleucine_degradation	11	10	13
00290_Valine_leucine_and_isoleucine_biosynthesis	13	13	13
00300_Lysine_biosynthesis	13	13	13
00310_Lysine_degradation	8	9	9
00220_Arginine_biosynthesis	17	16	16
00330_Arginine_and_proline_metabolism	24	23	22
00340_Histidine_metabolism	14	15	15
00350_Tyrosine_metabolism	16	15	16
00360_Phenylalanine_metabolism	14	16	16
00380_Tryptophan_metabolism	8	7	7
00400_Phenylalanine_tyrosine_and_tryptophan_biosynthesis	19	20	18
00410_beta-Alanine_metabolism	11	9	11
00430_Taurine_and_hypotaurine_metabolism	4	4	4
00440_Phosphonate_and_phosphinate_metabolism	NA	1	NA
00450_Selenocompound_metabolism	12	12	12
00460_Cyanoamino_acid_metabolism	5	5	6
00471_D-Glutamine_and_D-glutamate_metabolism	4	4	4
00473_D-Alanine_metabolism	2	4	3
00480_Glutathione_metabolism	13	13	13
00531_Glycosaminoglycan_degradation	2	2	2
00603_Glycosphingolipid_biosynthesis_-_globo_series	1	1	1
00604_Glycosphingolipid_biosynthesis_-_ganglio_series	1	1	1
00540_Lipopolysaccharide_biosynthesis	24	25	23
00550_Peptidoglycan_biosynthesis	20	20	20
00511_Other_glycan_degradation	1	2	1
00730_Thiamine_metabolism	11	11	11
00740_Riboflavin_metabolism	7	7	8
00750_Vitamin_B6_metabolism	9	8	9
00760_Nicotinate_and_nicotinamide_metabolism	19	18	18
00770_Pantothenate_and_CoA_biosynthesis	17	17	16
00780_Biotin_metabolism	12	12	12
00785_Lipoic_acid_metabolism	2	2	2
00790_Folate_biosynthesis	20	20	19
00670_One_carbon_pool_by_folate	11	11	11
00830_Retinol_metabolism	1	1	2
00860_Porphyrin_and_chlorophyll_metabolism	37	37	37
00130_Ubiquinone_and_other_terpenoid-quinone_biosynthesis	17	18	18
00900_Terpenoid_backbone_biosynthesis	13	12	13
00906_Carotenoid_biosynthesis	NA	3	NA
00908_Zeatin_biosynthesis	1	1	2
00903_Limonene_and_pinene_degradation	3	3	3
00281_Geraniol_degradation	3	3	3
01051_Biosynthesis_of_ansamycins	1	1	1
01056_Biosynthesis_of_type_II_polyketide_backbone	NA	2	NA
00253_Tetracycline_biosynthesis	5	6	5
00523_Polyketide_sugar_unit_biosynthesis	2	2	2
01053_Biosynthesis_of_siderophore_group_nonribosomal_peptides	8	9	10
01055_Biosynthesis_of_vancomycin_group_antibiotics	1	2	1
00940_Phenylpropanoid_biosynthesis	2	2	2
00950_Isoquinoline_alkaloid_biosynthesis	2	2	2
00960_Tropane_piperidine_and_pyridine_alkaloid_biosynthesis	3	3	3
00965_Betalain_biosynthesis	1	1	1
00332_Carbapenem_biosynthesis	2	7	2
00261_Monobactam_biosynthesis	8	10	8
00521_Streptomycin_biosynthesis	6	6	7
00524_Butirosin_and_neomycin_biosynthesis	1	1	1
00401_Novobiocin_biosynthesis	4	5	4
00362_Benzoate_degradation	7	5	9
00627_Aminobenzoate_degradation	4	5	5
00625_Chloroalkane_and_chloroalkene_degradation	4	4	5
00622_Xylene_degradation	2	2	2
00633_Nitrotoluene_degradation	1	1	NA
00642_Ethylbenzene_degradation	1	1	1
00643_Styrene_degradation	2	4	3
00791_Atrazine_degradation	3	3	3
00930_Caprolactam_degradation	3	3	3
00621_Dioxin_degradation	2	2	2
00626_Naphthalene_degradation	3	5	4
00980_Metabolism_of_xenobiotics_by_cytochrome_P450	3	2	4
00982_Drug_metabolism_-_cytochrome_P450	2	2	3
00983_Drug_metabolism_-_other_enzymes	8	7	8
03020_RNA_polymerase	4	4	4
03010_Ribosome	54	54	53
00970_Aminoacyl-tRNA_biosynthesis	25	26	25
03013_RNA_transport	2	2	2
03008_Ribosome_biogenesis_in_eukaryotes	2	2	2
03060_Protein_export	17	17	17
04141_Protein_processing_in_endoplasmic_reticulum	1	1	1
04122_Sulfur_relay_system	17	17	17
03018_RNA_degradation	16	16	16
03030_DNA_replication	16	16	16
03410_Base_excision_repair	10	11	10
03420_Nucleotide_excision_repair	7	7	7
03430_Mismatch_repair	19	20	20
03440_Homologous_recombination	26	26	26
02010_ABC_transporters	102	103	99
02060_Phosphotransferase_system	24	26	22
03070_Bacterial_secretion_system	41	41	40
02020_Two-component_system	84	96	87
04011_MAPK_signaling_pathway_-_yeast	1	1	1
04066_HIF-1_signaling_pathway	2	2	2
04068_FoxO_signaling_pathway	2	2	2
04070_Phosphatidylinositol_signaling_system	3	3	3
04072_Phospholipase_D_signaling_pathway	1	1	1
04024_cAMP_signaling_pathway	NA	1	1
04151_PI3K-Akt_signaling_pathway	1	1	1
04152_AMPK_signaling_pathway	3	2	3
04142_Lysosome	1	2	2
04146_Peroxisome	6	6	8
02030_Bacterial_chemotaxis	16	16	16
02040_Flagellar_assembly	36	36	36
04112_Cell_cycle_-_Caulobacter	11	11	11
04214_Apoptosis_-_fly	1	1	1
04621_NOD-like_receptor_signaling_pathway	1	1	1
04612_Antigen_processing_and_presentation	1	1	1
04910_Insulin_signaling_pathway	2	2	2
04922_Glucagon_signaling_pathway	3	3	3
04920_Adipocytokine_signaling_pathway	1	1	1
03320_PPAR_signaling_pathway	2	3	3
04915_Estrogen_signaling_pathway	1	1	1
04914_Progesterone-mediated_oocyte_maturation	1	1	1
04917_Prolactin_signaling_pathway	1	1	1
04918_Thyroid_hormone_synthesis	1	1	1
04964_Proximal_tubule_bicarbonate_reclamation	1	1	1
04724_Glutamatergic_synapse	2	2	2
04727_GABAergic_synapse	2	2	3
04211_Longevity_regulating_pathway_-_mammal	2	2	2
04212_Longevity_regulating_pathway_-_worm	5	5	5
04213_Longevity_regulating_pathway_-_multiple_species	3	3	3
04626_Plant-pathogen_interaction	4	6	6
05200_Pathways_in_cancer	2	2	2
05230_Central_carbon_metabolism_in_cancer	5	5	5
05231_Choline_metabolism_in_cancer	1	1	1
05206_MicroRNAs_in_cancer	2	2	2
05205_Proteoglycans_in_cancer	1	1	2
05204_Chemical_carcinogenesis	2	2	2
05203_Viral_carcinogenesis	1	1	1
05211_Renal_cell_carcinoma	1	1	1
05215_Prostate_cancer	1	1	1
05340_Primary_immunodeficiency	2	2	2
05010_Alzheimer's_disease	1	1	1
05014_Amyotrophic_lateral_sclerosis	1	1	1
05016_Huntington's_disease	1	1	1
04930_Type_II_diabetes_mellitus	1	1	1
04940_Type_I_diabetes_mellitus	1	1	1
04931_Insulin_resistance	2	2	2
05110_Vibrio_cholerae_infection	NA	1	NA
05111_Vibrio_cholerae_pathogenic_cycle	6	6	6
05120_Epithelial_cell_signaling_in_Helicobacter_pylori_infection	3	2	2
05132_Salmonella_infection	4	3	4
05133_Pertussis	10	9	10
05134_Legionellosis	4	4	4
05150_Staphylococcus_aureus_infection	1	4	1
05152_Tuberculosis	3	3	3
05100_Bacterial_invasion_of_epithelial_cells	1	1	2
05142_Chagas_disease	1	1	1
05143_African_trypanosomiasis	1	1	1
01501_beta-Lactam_resistance	14	15	16
01502_Vancomycin_resistance	5	5	5
01503_Cationic_antimicrobial_peptide	29	31	27
00072_Synthesis_and_degradation_of_ketone_bodies	1	NA	1
01054_Nonribosomal_peptide_structures	2	NA	1
00984_Steroid_degradation	1	NA	1
04014_Ras_signaling_pathway	1	NA	NA
04668_TNF_signaling_pathway	1	NA	NA
04912_GnRH_signaling_pathway	1	NA	NA
04976_Bile_secretion	1	NA	1
05219_Bladder_cancer	1	NA	1
05146_Amoebiasis	1	NA	NA
00565_Ether_lipid_metabolism	NA	NA	1
00563_GlycosylphosphatidylinositolGPI-anchor_biosynthesis	NA	NA	1
00311_Penicillin_and_cephalosporin_biosynthesis	NA	NA	1
03022_Basal_transcription_factors	NA	NA	1
05131_Shigellosis	NA	NA	1
05168_Herpes_simplex_infection	NA	NA	1
