# Supplementary material for: Genome comparisons provide insights into the role of secondary metabolites in the pathogenic phase of the Photorhabdus life cycle
Source: BMC Genomics. 2016 Aug 3;17:537. doi: 10.1186/s12864-016-2862-4 (PMC4971723; doi:10.1186/s12864-016-2862-4)
Supplement: Additional file 7: — Coding sequences mentioned in the text and their respective locus tags. (XLSX 47 kb) [file 12864_2016_2862_MOESM7_ESM.xlsx]

## Sheet: Sheet1
Additional file 7. Coding sequences mentioned in the text and their ortholog in each species
Description	P. luminescens TT01	P. luminescens subsp. PB45.1	P. asymbiotica ATCC 43949	P. asymbiotica subsp. australis PB68.1	P. temperata subsp. thracensis DSM 15199	P. temperata subsp. temperata M1021	P. temperata subsp. khanii NC19
Immune evasion
isnA	plu2816	Phpb_03368	PAU_01721	Ppb6_02077	VY86_17225	B738_12449	PTE_03653
isnB	plu2817	Phpb_03367	PAU_01720	Ppb6_02076	VY86_17220	*	PTE_03652
glycosyltransferase for isn locus	plu1762	Phpb_02637	PAU_02756	Ppb6_02699	VY86_22135	*	PTE_03388
Two-component systems
cpxR	plu4794	Phpb_00365	PAU_04309	Ppb6_00283	VY86_07505	B738_25987	PTE_02019
cpxA	plu4795	Phpb_00364	PAU_04310	Ppb6_00284	VY86_07510	B738_25982	PTE_02018
baeR	plu2778	Phpb_03401	PAU_01764	Ppb6_02111	VY86_17420	B738_19676	PTE_03694
baeS	plu2777	Phpb_03402	PAU_01765	Ppb6_02112	VY86_17425	B738_19681	PTE_03695
tctE	plu3178	Phpb_02174	PAU_01446	Ppb6_03493	VY86_00425	B738_14307	PTE_00748
tctD	plu3179	Phpb_02173	PAU_01445	Ppb6_03494	VY86_00430	B738_14312	PTE_00747
uhpA	plu0815	Phpb_01945	PAU_00767	Ppb6_00994	VY86_04170	B738_02890	PTE_04055
uhpB	plu0814	Phpb_01944	PAU_00766	Ppb6_00995	VY86_04165	B738_02895	PTE_04054
ompR	plu0212	Phpb_02895	PAU_00160	Ppb6_00531	VY86_08990	B738_04086	PTE_02326
envZ	plu0213	Phpb_02894	PAU_00161	Ppb6_00530	VY86_08995	B738_04081	PTE_02325
phoP	plu2807	Phpb_03377	PAU_01734	Ppb6_02087	VY86_17270	B738_12389	PTE_03662
phoQ	plu2808	Phpb_03376	PAU_01733	Ppb6_02086	VY86_17265	B738_12394	PTE_03661
astS	plu2286	Phpb_04034	PAU_02267	Ppb6_02783	VY86_19720	B738_06349	PTE_02746
astR	plu2285	Phpb_04033	PAU_02266	Ppb6_02784	VY86_19725	B738_06344	PTE_02747
DNA binding proteins
LuxR-like regulator	plu3221,plu2002	Phpb_02130	PAU_02576	Ppb6_03693	VY86_20930	B738_25295,B738_13159	PTE_03575
LuxR-like regulator	plu0922,plu0921,plu0925,plu0918,plu0919	Phpb_01241,Phpb_01242,Phpb_01243	PAU_00844	Ppb6_00834	VY86_16375,VY86_16350	B738_17063	PTE_04146,PTE_04144
hpaA	plu0980	Phpb_03263	PAU_00923	Ppb6_00053	VY86_12555	B738_10196	PTE_04215
Other virulence factors
prtA	plu0655	Phpb_04218	PAU_00605	Ppb6_03855	VY86_04565	B738_04946	PTE_01003
mcf	plu4142,plu3128	Phpb_03829	PAU_03369	Ppb6_03404	VY86_19830	*	PTE_02753
tccC1	plu4167	Phpb_03716	*	*	VY86_13985	B738_09836	PTE_01579
tccC3	plu0967	Phpb_03241	*	*	*	B738_14894	PTE_04192
tccB1	plu4168	Phpb_03714	*	*	*	B738_09846	PTE_01580
tccA1	plu4169	Phpb_03713	*	*	*	*	PTE_01581
tccC5	plu0964	Phpb_03233	*	*	*	*	*
tcdA4	plu0965	Phpb_03234	*	*	*	*	*
tcdB1	plu0961	Phpb_03230	*	*	*	*	*
tccA3	plu0805	Phpb_01935	*	*	*	*	*
tccB3	plu0806	Phpb_01936	*	*	*	*	*
tccA2	plu2460	Phpb_01606,Phpb_02520	PAU_02057	Ppb6_00785	VY86_13975	B738_22695	PTE_02589
tcaC	plu0515	Phpb_03661	PAU_03849	Ppb6_03622	VY86_11180	B738_17292	PTE_01617
tcaZ	plu0514	Phpb_03660	PAU_03851	Ppb6_03620	VY86_11145	*	PTE_01619
tcdB2	plu0969	Phpb_03243	PAU_00898	Ppb6_00069	VY86_12665	B738_14884	PTE_04194
tccC2	plu4488,plu0960	Phpb_04424,Phpb_03222	PAU_00880	Ppb6_00852	VY86_13905	B738_12292	PTE_01243,PTE_04167
tcdA5	plu0971	Phpb_03245	PAU_00901	Ppb6_00067	VY86_13845	B738_10061	PTE_04196
tccB2	plu2459	Phpb_01605	PAU_02058	Ppb6_00784	*	B738_20958	PTE_02590
rtxB	plu1333	Phpb_03087	PAU_03077	Ppb6_01138	VY86_01105	B738_25075	PTE_04479
rtxC	plu1335	Phpb_03089	PAU_03075	Ppb6_01136	VY86_01095	B738_25065	PTE_04481
rtxD	plu1332	Phpb_03086	PAU_03078	Ppb6_01139	VY86_01110	B738_25080	PTE_04478
unkown insecticidal toxin	plu0976,plu4182	Phpb_03707,Phpb_03253,Phpb_02222	PAU_03850	Ppb6_03621	VY86_11175	B738_10101,B738_17287	PTE_01618
Core type III secretion system genes
sctC	plu3778	Phpb_00789	PAU_01037	Ppb6_00165	VY86_02360	*	PTE_00347
sctJ	plu3785	Phpb_00796	PAU_01031	Ppb6_00158	VY86_02395	B738_07104	PTE_00340
sctN	plu3767	Phpb_00778	PAU_01052	Ppb6_00179	VY86_02305	B738_06999	PTE_00358
sctQ	plu3770	Phpb_00781	PAU_01049	Ppb6_00176	VY86_02320	B738_07024	PTE_00355
sctR	plu3771	Phpb_00782	PAU_01048	Ppb6_00175	VY86_02325	B738_07029	PTE_00354
sctS	plu3772	Phpb_00783	PAU_01047	Ppb6_00174	VY86_02330	B738_07034	PTE_00353
sctT	plu3773	Phpb_00784	PAU_01046	Ppb6_00173	VY86_02335	B738_07039	PTE_00352
sctU	plu3774	Phpb_00785	PAU_01045	Ppb6_00172	VY86_02340	B738_07044	PTE_00351
sctV	plu3761	Phpb_00772	PAU_01057	Ppb6_00184	VY86_02275	*	PTE_00364
Accessory type III secretion genes
sctB	plu3777	Phpb_00788	PAU_01038	Ppb6_00166	VY86_02355	B738_07059	PTE_00348
sctD	plu3779	Phpb_00790	PAU_01036	Ppb6_00164	VY86_02365	B738_07074	PTE_00346
sctE	plu3780	Phpb_00791	*	Ppb6_00163	VY86_02370	B738_07079	PTE_00345
sctF	plu3781	Phpb_00792	PAU_01035	Ppb6_00162	VY86_02375	B738_07084	PTE_00344
sctG	plu3782	Phpb_00793	PAU_01034	Ppb6_00161	VY86_02380	B738_07089	PTE_00343
sctH	plu3783	Phpb_00794	PAU_01033	Ppb6_00160	VY86_02385	B738_07094	PTE_00342
sctI	plu3784	Phpb_00795	PAU_01032	Ppb6_00159	VY86_02390	B738_07099	PTE_00341
sctK	plu3786	Phpb_00797	PAU_01030	Ppb6_00157	VY86_02400	B738_07109	PTE_00339
sctL	plu3787	Phpb_00798	PAU_01029	Ppb6_00156	VY86_02405	B738_07114	PTE_00338
sctO	plu3768	Phpb_00779	PAU_01051	Ppb6_00178	VY86_02310	B738_07004	PTE_00357
sctP	plu3769	Phpb_00780	PAU_01050	Ppb6_00177	*	*	PTE_00356
sctW	plu3766	Phpb_00777	PAU_01053	Ppb6_00180	VY86_02300	B738_06994	PTE_00359
sctX	plu3763	Phpb_00774	PAU_01055	Ppb6_00182	VY86_02285	B738_06979	PTE_00362
sctY	plu3762	Phpb_00773	PAU_01056	Ppb6_00183	VY86_02280	B738_06974	PTE_00363
