# Supplementary material for: Genome comparisons provide insights into the role of secondary metabolites in the pathogenic phase of the Photorhabdus life cycle
Source: BMC Genomics. 2016 Aug 3;17:537. doi: 10.1186/s12864-016-2862-4 (PMC4971723; doi:10.1186/s12864-016-2862-4)
Supplement: Additional file 8: — P. asymbiotica specific coding sequences. (XLSX 20 kb) [file 12864_2016_2862_MOESM8_ESM.xlsx]

## Sheet: asymbiotica.csv
Predicted function	E_coli_K12	P_luminescens_TT01	P_luminescens_PB45.5	P_asymbiotica_DSM43949	P_asymbiotica_PB68.1	P_temperata_thracensis_DSM15199	P_temperata_M1021	P_temperata_NC19
Biosynthetic gene cluster associated
Polyketide synthase PksJ	*	*	*	PAU_00914	Ppb6_00062	*	*	*
Colicin V secretion protein CvaA	*	*	*	PAU_02325	Ppb6_04135	*	*	*
Dimodular nonribosomal peptide synthase	*	*	*	PAU_02551	Ppb6_03670	*	*	*
Tyrocidine synthase 3	*	*	*	PAU_02221	Ppb6_02804	*	*	*
Tyrocidine synthase 3	*	*	*	PAU_02216	Ppb6_02814	*	*	*
Probable virulence associated
Flagellar biosynthetic protein FliP precursor	*	*	*	PAU_03473	Ppb6_01924	*	*	*
Homoserine/homoserine lactone efflux protein	*	*	*	PAU_03995	Ppb6_04376	*	*	*
Natural resistance-associated macrophage protein	*	*	*	PAU_00443	Ppb6_03359	*	*	*
Secretion system apparatus protein SsaV	*	*	*	PAU_03450	Ppb6_02328	*	*	*
Secretion system effector C (SseC) like family protein	*	*	*	PAU_03457	Ppb6_01908	*	*	*
Plasmid maintenance system killer protein	*	*	*	PAU_02160	Ppb6_00710	*	*	*
Surface presentation of antigens (SPOA)	*	*	*	PAU_03444	Ppb6_02322	*	*	*
Surface presentation of antigens protein SpaS	*	*	*	PAU_03449	Ppb6_02327	*	*	*
Type III secretion ATP synthase HrcN	*	*	*	PAU_03469	Ppb6_01920	*	*	*
Type III secretion system outer membrane protein SpiA precursor	*	*	*	PAU_03470	Ppb6_01921	*	*	*
Regulatory
DNA-binding transcriptional regulator BaeR	*	*	*	PAU_03441	Ppb6_02320	*	*	*
DNA-binding transcriptional regulator Nlp	*	*	*	PAU_03919	Ppb6_01356	*	*	*
Fatty acid metabolism regulator protein	*	*	*	PAU_00433	Ppb6_03367	*	*	*
Transcriptional activator CadC	*	*	*	PAU_03464	Ppb6_01915	*	*	*
Transcriptional regulator SlyA	*	*	*	PAU_02224	Ppb6_02801	*	*	*
Cell wall and cell processes
1-deoxypentalenic acid 11-beta-hydroxylase	*	*	*	PAU_00143	Ppb6_00585	*	*	*
2-(S)-hydroxypropyl-CoM dehydrogenase	*	*	*	PAU_02388	Ppb6_04086	*	*	*
2-methylcitrate dehydratase	*	*	*	PAU_02229	Ppb6_02796	*	*	*
2-oxo-Delta(3)-4,5,5-trimethylcyclopentenylacetyl-CoA monooxygenase	*	*	*	PAU_03994	Ppb6_04377	*	*	*
2-oxoacid ferredoxin oxidoreductase	*	*	*	PAU_02252	Ppb6_02795	*	*	*
2-oxoglutarate carboxylase large subunit	*	*	*	PAU_02228	Ppb6_02797	*	*	*
3-hydroxy-3-methylglutaryl-coenzyme A reductase	*	*	*	PAU_02226	Ppb6_02799	*	*	*
3-oxoacyl-[acyl-carrier-protein] reductase FabG	*	*	*	PAU_02257	Ppb6_02789	*	*	*
4'-demethylrebeccamycin synthase	*	*	*	PAU_02755	Ppb6_02700	*	*	*
5'-nucleotidase SurE	*	*	*	PAU_02395	Ppb6_04034	*	*	*
6-aminohexanoate-dimer hydrolase	*	*	*	PAU_03479	Ppb6_01928	*	*	*
ADP-heptose--LPS heptosyltransferase 2	*	*	*	PAU_01585	Ppb6_00142	*	*	*
ATP-dependent zinc metalloprotease FtsH 3	*	*	*	PAU_03339	Ppb6_02224	*	*	*
Bacteriophage lysis protein	*	*	*	PAU_03329	Ppb6_02214	*	*	*
Benzoate--CoA ligase	*	*	*	PAU_03368	Ppb6_02241	*	*	*
Biotin carboxylase	*	*	*	PAU_02227	Ppb6_02798	*	*	*
coproporphyrinogen III oxidase	*	*	*	PAU_00142	Ppb6_00584	*	*	*
CRISPR-associated endonuclease Cas1	*	*	*	PAU_02736	Ppb6_02719	*	*	*
Crotonyl-CoA reductase	*	*	*	PAU_02213	Ppb6_02817	*	*	*
Cytochrome bd-I ubiquinol oxidase subunit 1	*	*	*	PAU_00874	Ppb6_00857	*	*	*
Cytochrome bd-I ubiquinol oxidase subunit 2	*	*	*	PAU_00875	Ppb6_00856	*	*	*
D12 class N6 adenine-specific DNA methyltransferase	*	*	*	PAU_04395	Ppb6_00376	*	*	*
Decarbamoylnovobiocin carbamoyltransferase	*	*	*	PAU_02394	Ppb6_04035	*	*	*
dephospho-CoA kinase/protein folding accessory domain-containing protein	*	*	*	PAU_00623	Ppb6_03837	*	*	*
DoxX	*	*	*	PAU_00873	Ppb6_00858	*	*	*
dTDP-4-amino-4,6-dideoxy-D-glucose transaminase	*	*	*	PAU_04327	Ppb6_00301	*	*	*
Inclusion body protein	*	*	*	PAU_00247	Ppb6_03240	*	*	*
Initiator Replication protein	*	*	*	PAU_00253	Ppb6_02321	*	*	*
Inositol phosphate phosphatase SopB	*	*	*	PAU_01919	Ppb6_01794	*	*	*
Lipooligosaccharide biosynthesis protein lex-1	*	*	*	PAU_01661	Ppb6_00134	*	*	*
Lipoprotein E precursor	*	*	*	PAU_00613	Ppb6_03847	*	*	*
Macrolide export ATP-binding/permease protein MacB	*	*	*	PAU_02200	Ppb6_02832	*	*	*
Major Facilitator Superfamily protein	*	*	*	PAU_02214	Ppb6_02816	*	*	*
Methionine aminopeptidase	*	*	*	PAU_03691	Ppb6_02481	*	*	*
Methylmalonyl-CoA carboxyltransferase 12S subunit	*	*	*	PAU_02225	Ppb6_02800	*	*	*
molybdenum cofactor biosynthesis protein A	*	*	*	PAU_01013	Ppb6_03126	*	*	*
molybdenum cofactor biosynthesis protein A	*	*	*	PAU_01012	Ppb6_03127	*	*	*
N-6 DNA Methylase	*	*	*	PAU_00431	Ppb6_03372	*	*	*
N,N'-diacetylbacillosaminyl-diphospho-undecaprenol alpha-1,3-N-acetylgalactosaminyltransferase	*	*	*	PAU_04339	Ppb6_00312	*	*	*
NAD:arginine ADP-ribosyltransferase	*	*	*	PAU_03033	Ppb6_03406	*	*	*
NADH oxidase	*	*	*	PAU_02256	Ppb6_02790	*	*	*
Nucleoside triphosphatase NudI	*	*	*	PAU_01229	Ppb6_02347	*	*	*
Outer membrane efflux protein	*	*	*	PAU_02198	Ppb6_02834	*	*	*
outer membrane protein A	*	*	*	PAU_03448	Ppb6_02326	*	*	*
Patatin-like phospholipase	*	*	*	PAU_01043	Ppb6_00171	*	*	*
PglZ domain protein	*	*	*	PAU_00432	Ppb6_03371	*	*	*
Phosphoethanolamine transferase EptC	*	*	*	PAU_03690	Ppb6_02478	*	*	*
Phosphoribosylglycinamide formyltransferase	*	*	*	PAU_04329	Ppb6_00303	*	*	*
Polysaccharide biosynthesis protein	*	*	*	PAU_04330	Ppb6_00304	*	*	*
putative ABC transporter ATP-binding protein	*	*	*	PAU_00628	Ppb6_03833	*	*	*
putative DMT superfamily transporter inner membrane protein	*	*	*	PAU_00752	Ppb6_01005	*	*	*
Putative glycosyltransferase EpsF	*	*	*	PAU_04335	Ppb6_00308	*	*	*
Putative L-lactate dehydrogenase operon regulatory protein	*	*	*	PAU_01175	Ppb6_01627	*	*	*
Putative lumazine-binding protein	*	*	*	PAU_02209	Ppb6_02822	*	*	*
Putative O-methyltransferase/MSMEI_4947	*	*	*	PAU_00434	Ppb6_03366	*	*	*
Putative ribosomal N-acetyltransferase YdaF	*	*	*	PAU_02219	Ppb6_02811	*	*	*
putative sugar transferase EpsL	*	*	*	PAU_04341	Ppb6_00314	*	*	*
putative transport protein HsrA	*	*	*	PAU_03377	Ppb6_02249	*	*	*
Pyocin-S2 immunity protein	*	*	*	PAU_02823	Ppb6_03058	*	*	*
Radical SAM superfamily protein	*	*	*	PAU_00634	Ppb6_03827	*	*	*
Restriction endonuclease NotI	*	*	*	PAU_04396	Ppb6_00377	*	*	*
ribonuclease Z	*	*	*	PAU_00869	Ppb6_00862	*	*	*
S-adenosylmethionine synthetase	*	*	*	PAU_02393	Ppb6_04036	*	*	*
Serine acetyltransferase	*	*	*	PAU_04333	Ppb6_00306	*	*	*
Surfactin synthase subunit 1	*	*	*	PAU_02218	Ppb6_02812	*	*	*
T4-like virus tail tube protein gp19	*	*	*	PAU_03353	Ppb6_02238	*	*	*
Thermostable carboxypeptidase 1	*	*	*	PAU_00753	Ppb6_01004	*	*	*
topology modulation protein	*	*	*	PAU_02387	Ppb6_04087	*	*	*
Tyrosine recombinase XerD	*	*	*	PAU_00962	Ppb6_02842	*	*	*
UDP-glucose 4-epimerase	*	*	*	PAU_04338	Ppb6_00311	*	*	*
UDP-N-acetyl-alpha-D-glucosamine C6 dehydratase	*	*	*	PAU_04342	Ppb6_00315	*	*	*
UDP-N-acetyl-D-glucosamine 6-dehydrogenase	*	*	*	PAU_04337	Ppb6_00310	*	*	*
UDP-N-acetylglucosamine 1-carboxyvinyltransferase 2	*	*	*	PAU_00633	Ppb6_03828	*	*	*
WbqC-like protein family protein	*	*	*	PAU_04328	Ppb6_00302	*	*	*
Hypothetical proteins
hypothetical protein	*	*	*	PAU_03358,PAU_00671	Ppb6_01292	*	*	*
hypothetical protein	*	*	*	PAU_03667,PAU_01223,PAU_00884,PAU_00792	Ppb6_02218,Ppb6_02829,Ppb6_01086	*	*	*
hypothetical protein	*	*	*	PAU_00449	Ppb6_03320	*	*	*
hypothetical protein	*	*	*	PAU_01629	Ppb6_01989	*	*	*
hypothetical protein	*	*	*	PAU_03087	Ppb6_01148	*	*	*
hypothetical protein	*	*	*	PAU_03024	Ppb6_00092	*	*	*
hypothetical protein	*	*	*	PAU_01164	Ppb6_00097	*	*	*
hypothetical protein	*	*	*	PAU_00693	Ppb6_00128	*	*	*
hypothetical protein	*	*	*	PAU_00694	Ppb6_00129	*	*	*
hypothetical protein	*	*	*	PAU_01042	Ppb6_00170	*	*	*
hypothetical protein	*	*	*	PAU_03807	Ppb6_00219	*	*	*
hypothetical protein	*	*	*	PAU_03806	Ppb6_00220	*	*	*
hypothetical protein	*	*	*	PAU_04334	Ppb6_00307	*	*	*
hypothetical protein	*	*	*	PAU_00145	Ppb6_00587	*	*	*
hypothetical protein	*	*	*	PAU_02164	Ppb6_00706	*	*	*
hypothetical protein	*	*	*	PAU_02137	Ppb6_00727	*	*	*
hypothetical protein	*	*	*	PAU_00240	Ppb6_00824	*	*	*
hypothetical protein	*	*	*	PAU_00239	Ppb6_00825	*	*	*
hypothetical protein	*	*	*	PAU_00872	Ppb6_00859	*	*	*
hypothetical protein	*	*	*	PAU_00870	Ppb6_00861	*	*	*
hypothetical protein	*	*	*	PAU_00856	Ppb6_00878	*	*	*
hypothetical protein	*	*	*	PAU_00751	Ppb6_01006	*	*	*
hypothetical protein	*	*	*	PAU_00714	Ppb6_01037	*	*	*
hypothetical protein	*	*	*	PAU_03901	Ppb6_01055	*	*	*
hypothetical protein	*	*	*	PAU_00921	Ppb6_01081	*	*	*
hypothetical protein	*	*	*	PAU_02787	Ppb6_01129	*	*	*
hypothetical protein	*	*	*	PAU_03086	Ppb6_01147	*	*	*
hypothetical protein	*	*	*	PAU_03897	Ppb6_01331	*	*	*
hypothetical protein	*	*	*	PAU_03898	Ppb6_01332	*	*	*
hypothetical protein	*	*	*	PAU_03917	Ppb6_01353	*	*	*
hypothetical protein	*	*	*	PAU_03918	Ppb6_01355	*	*	*
hypothetical protein	*	*	*	PAU_03923	Ppb6_01360	*	*	*
hypothetical protein	*	*	*	PAU_01176	Ppb6_01628	*	*	*
hypothetical protein	*	*	*	PAU_02806	Ppb6_01736	*	*	*
hypothetical protein	*	*	*	PAU_02826	Ppb6_01785	*	*	*
hypothetical protein	*	*	*	PAU_02011	Ppb6_01886	*	*	*
hypothetical protein	*	*	*	PAU_02012	Ppb6_01887	*	*	*
hypothetical protein	*	*	*	PAU_03453	Ppb6_01904	*	*	*
hypothetical protein	*	*	*	PAU_03454	Ppb6_01905	*	*	*
hypothetical protein	*	*	*	PAU_03455	Ppb6_01906	*	*	*
hypothetical protein	*	*	*	PAU_03456	Ppb6_01907	*	*	*
hypothetical protein	*	*	*	PAU_03458	Ppb6_01909	*	*	*
hypothetical protein	*	*	*	PAU_03459	Ppb6_01910	*	*	*
hypothetical protein	*	*	*	PAU_03460	Ppb6_01911	*	*	*
hypothetical protein	*	*	*	PAU_03461	Ppb6_01912	*	*	*
hypothetical protein	*	*	*	PAU_03462	Ppb6_01913	*	*	*
hypothetical protein	*	*	*	PAU_03463	Ppb6_01914	*	*	*
hypothetical protein	*	*	*	PAU_03465	Ppb6_01916	*	*	*
hypothetical protein	*	*	*	PAU_03466	Ppb6_01917	*	*	*
hypothetical protein	*	*	*	PAU_03467	Ppb6_01918	*	*	*
hypothetical protein	*	*	*	PAU_03468	Ppb6_01919	*	*	*
hypothetical protein	*	*	*	PAU_03471	Ppb6_01922	*	*	*
hypothetical protein	*	*	*	PAU_03472	Ppb6_01923	*	*	*
hypothetical protein	*	*	*	PAU_03474	Ppb6_01925	*	*	*
hypothetical protein	*	*	*	PAU_03475	Ppb6_01926	*	*	*
hypothetical protein	*	*	*	PAU_03478	Ppb6_01927	*	*	*
hypothetical protein	*	*	*	PAU_01795	Ppb6_01949	*	*	*
hypothetical protein	*	*	*	PAU_02150,PAU_01929	Ppb6_01999	*	*	*
hypothetical protein	*	*	*	PAU_01670	Ppb6_02025	*	*	*
hypothetical protein	*	*	*	PAU_01759	Ppb6_02107	*	*	*
hypothetical protein	*	*	*	PAU_01760	Ppb6_02108	*	*	*
hypothetical protein	*	*	*	PAU_00374	Ppb6_02185	*	*	*
hypothetical protein	*	*	*	PAU_03334	Ppb6_02220	*	*	*
hypothetical protein	*	*	*	PAU_03338	Ppb6_02223	*	*	*
hypothetical protein	*	*	*	PAU_03354	Ppb6_02239	*	*	*
hypothetical protein	*	*	*	PAU_03355	Ppb6_02240	*	*	*
hypothetical protein	*	*	*	PAU_03372	Ppb6_02244	*	*	*
hypothetical protein	*	*	*	PAU_03440	Ppb6_02319	*	*	*
hypothetical protein	*	*	*	PAU_03445	Ppb6_02323	*	*	*
hypothetical protein	*	*	*	PAU_03446	Ppb6_02324	*	*	*
hypothetical protein	*	*	*	PAU_03447	Ppb6_02325	*	*	*
hypothetical protein	*	*	*	PAU_03451	Ppb6_02329	*	*	*
hypothetical protein	*	*	*	PAU_03513	Ppb6_02340	*	*	*
hypothetical protein	*	*	*	PAU_01228	Ppb6_02348	*	*	*
hypothetical protein	*	*	*	PAU_03560	Ppb6_02382	*	*	*
hypothetical protein	*	*	*	PAU_02760	Ppb6_02695	*	*	*
hypothetical protein	*	*	*	PAU_02255	Ppb6_02792	*	*	*
hypothetical protein	*	*	*	PAU_02253	Ppb6_02794	*	*	*
hypothetical protein	*	*	*	PAU_02220	Ppb6_02810	*	*	*
hypothetical protein	*	*	*	PAU_03314	Ppb6_02860	*	*	*
hypothetical protein	*	*	*	PAU_02070	Ppb6_02944	*	*	*
hypothetical protein	*	*	*	PAU_01014	Ppb6_03125	*	*	*
hypothetical protein	*	*	*	PAU_01011	Ppb6_03128	*	*	*
hypothetical protein	*	*	*	PAU_00264	Ppb6_03233	*	*	*
hypothetical protein	*	*	*	PAU_03049	Ppb6_03326	*	*	*
hypothetical protein	*	*	*	PAU_00430	Ppb6_03373	*	*	*
hypothetical protein	*	*	*	PAU_00429	Ppb6_03374	*	*	*
hypothetical protein	*	*	*	PAU_00428	Ppb6_03375	*	*	*
hypothetical protein	*	*	*	PAU_02289	Ppb6_03393	*	*	*
hypothetical protein	*	*	*	PAU_00270	Ppb6_03429	*	*	*
hypothetical protein	*	*	*	PAU_00271	Ppb6_03430	*	*	*
hypothetical protein	*	*	*	PAU_00388	Ppb6_03454	*	*	*
hypothetical protein	*	*	*	PAU_03319	Ppb6_03468	*	*	*
hypothetical protein	*	*	*	PAU_01484	Ppb6_03760	*	*	*
hypothetical protein	*	*	*	PAU_01480	Ppb6_03761	*	*	*
hypothetical protein	*	*	*	PAU_00632	Ppb6_03829	*	*	*
hypothetical protein	*	*	*	PAU_00629	Ppb6_03832	*	*	*
hypothetical protein	*	*	*	PAU_00624	Ppb6_03836	*	*	*
hypothetical protein	*	*	*	PAU_00622	Ppb6_03838	*	*	*
hypothetical protein	*	*	*	PAU_00621	Ppb6_03839	*	*	*
hypothetical protein	*	*	*	PAU_00620	Ppb6_03840	*	*	*
hypothetical protein	*	*	*	PAU_00619	Ppb6_03841	*	*	*
hypothetical protein	*	*	*	PAU_00618	Ppb6_03842	*	*	*
hypothetical protein	*	*	*	PAU_00615	Ppb6_03845	*	*	*
hypothetical protein	*	*	*	PAU_00614	Ppb6_03846	*	*	*
hypothetical protein	*	*	*	PAU_02415	Ppb6_04016	*	*	*
hypothetical protein	*	*	*	PAU_02391	Ppb6_04038	*	*	*
hypothetical protein	*	*	*	PAU_02390	Ppb6_04084	*	*	*
hypothetical protein	*	*	*	PAU_02386	Ppb6_04088	*	*	*
hypothetical protein	*	*	*	PAU_02328	Ppb6_04129	*	*	*
hypothetical protein	*	*	*	PAU_02323	Ppb6_04137	*	*	*
Phage and insertion sequences
Phage regulatory protein Rha (Phage_pRha)	*	*	*	PAU_03600,PAU_03101	Ppb6_01181	*	*	*
Phage tail fibre repeat protein	*	*	*	PAU_01317	Ppb6_03080	*	*	*
Phage tail fibre repeat protein	*	*	*	PAU_01648	Ppb6_02004	*	*	*
Phage tail sheath protein	*	*	*	PAU_03350	Ppb6_02235	*	*	*
Phage tail sheath protein	*	*	*	PAU_03351	Ppb6_02236	*	*	*
Phage tail sheath protein	*	*	*	PAU_03352	Ppb6_02237	*	*	*
