# Supplementary material for: Genome comparisons provide insights into the role of secondary metabolites in the pathogenic phase of the Photorhabdus life cycle
Source: BMC Genomics. 2016 Aug 3;17:537. doi: 10.1186/s12864-016-2862-4 (PMC4971723; doi:10.1186/s12864-016-2862-4)
Supplement: Additional file 9: — P. luminescens specific coding sequences. (XLSX 16 kb) [file 12864_2016_2862_MOESM9_ESM.xlsx]

## Sheet: luminescens.csv
Predicted function	E_coli_K12	P_luminescens_TT01	P_luminescens_PB45.5	P_asymbiotica_DSM43949	P_asymbiotica_PB68.1	P_temperata_thracensis_DSM15199	P_temperata_M1021	P_temperata_NC19
Biosynthetic gene cluster associated
Cyclo(L-leucyl-L-leucyl) synthase	*	plu0297	Phpb_04542	*	*	*	*	*
Acyl-homoserine lactone acylase PvdQ precursor	*	plu3527	Phpb_00551	*	*	*	*	*
Aspartyl/Asparaginyl beta-hydroxylase	*	plu3529	Phpb_00553	*	*	*	*	*
Tyrocidine synthase 3	*	plu3532	Phpb_00556	*	*	*	*	*
Linear gramicidin synthase subunit D	*	plu3533	Phpb_00557	*	*	*	*	*
Tyrocidine synthase 3	*	plu3534	Phpb_00558	*	*	*	*	*
Gramicidin S synthase 2	*	plu3535	Phpb_00559	*	*	*	*	*
enterobactin synthase subunit F	*	plu3531	Phpb_00555	*	*	*	*	*
Probable virulence associated
tcdA4	*	plu0965	Phpb_03234	*	*	*	*	*
tccC5	*	plu0964	Phpb_03233	*	*	*	*	*
tcdB1	*	plu0961	Phpb_03230	*	*	*	*	*
Toxin CcdB	*	plu2279	Phpb_04031	*	*	*	*	*
Toxin RTX-I translocation ATP-binding protein	*	plu3127	Phpb_03830	*	*	*	*	*
Hemolysin secretion protein D, chromosomal	*	plu3126	Phpb_03831	*	*	*	*	*
Toxin RTX-I translocation ATP-binding protein	*	plu3125	Phpb_03832	*	*	*	*	*
tccA3	*	plu0805	Phpb_01935	*	*	*	*	*
tccB3	*	plu0806	Phpb_01936	*	*	*	*	*
Regulatory
DNA-binding transcriptional regulator Nlp	*	plu3420	Phpb_00680	*	*	*	*	*
Helix-turn-helix	*	plu4365	Phpb_01714	*	*	*	*	*
HTH-type transcriptional regulator BenM	*	plu0963	Phpb_03232	*	*	*	*	*
HTH-type transcriptional regulator BenM	*	plu2792	Phpb_03387	*	*	*	*	*
Helix-turn-helix	*	plu4195	Phpb_03694	*	*	*	*	*
Helix-turn-helix domain protein	*	plu2707	Phpb_03473	*	*	*	*	*
Cell wall and cell processes
Acyltransferase family protein	*	plu2327	Phpb_04074	*	*	*	*	*
Plipastatin synthase subunit D	*	plu1212	Phpb_03160	*	*	*	*	*
Chloramphenicol acetyltransferase 2	*	plu2449	Phpb_00063	*	*	*	*	*
Antitoxin HigA	*	plu2846	Phpb_00084	*	*	*	*	*
GDSL-like Lipase/Acylhydrolase	*	plu2328	Phpb_04075	*	*	*	*	*
NAD(P)H azoreductase	*	plu2351	Phpb_04082	*	*	*	*	*
mRNA interferase RelE	*	plu2105	Phpb_03846	*	*	*	*	*
Linear gramicidin dehydrogenase LgrE	*	plu1217	Phpb_03168	*	*	*	*	*
putative fimbrial chaperone protein ElfD precursor	*	plu0780,plu3631	Phpb_00640	*	*	*	*	*
Multifunctional cyclase-dehydratase-3-O-methyl transferase TcmN	*	plu4890	Phpb_00273	*	*	*	*	*
Methionyl-tRNA formyltransferase	*	plu4830	Phpb_00334	*	*	*	*	*
Polysaccharide biosynthesis protein	*	plu4814	Phpb_00344	*	*	*	*	*
dTDP-3-amino-3,6-dideoxy-alpha-D-galactopyranose transaminase	*	plu4813	Phpb_00345	*	*	*	*	*
Protease synthase and sporulation protein PAI 2	*	plu1445	Phpb_03548	*	*	*	*	*
O-Glycosyl hydrolase family 30	*	plu2272	Phpb_04017	*	*	*	*	*
Plasmid stabilisation system protein	*	plu2306	Phpb_04057	*	*	*	*	*
Diaminobutyrate--2-oxoglutarate transaminase	*	plu2191	Phpb_03925	*	*	*	*	*
TDP-4-oxo-6-deoxy-alpha-D-glucose-3,4-oxoisomerase	*	plu4812	Phpb_00346	*	*	*	*	*
Endonuclease/Exonuclease/phosphatase family protein	*	plu4615	Phpb_01143	*	*	*	*	*
Aerobactin synthase	*	plu4621	Phpb_01147	*	*	*	*	*
Fe(3+)-citrate-binding protein YfmC precursor	*	plu4623	Phpb_01150	*	*	*	*	*
L-lysine N6-monooxygenase	*	plu4629	Phpb_01156	*	*	*	*	*
Aerobactin synthase	*	plu4630	Phpb_01157	*	*	*	*	*
Diaminobutyrate--2-oxoglutarate transaminase	*	plu1221	Phpb_01201	*	*	*	*	*
50S ribosomal protein L16 arginine hydroxylase	*	plu0856	Phpb_01297	*	*	*	*	*
Divergent AAA domain protein	*	plu0382	Phpb_01328	*	*	*	*	*
Peptidoglycan O-acetyltransferase	*	plu4383	Phpb_01694	*	*	*	*	*
Apocarotenoid-15,15'-oxygenase	*	plu4336	Phpb_01729	*	*	*	*	*
Citrate synthase 1	*	plu3138	Phpb_02211	*	*	*	*	*
EamA-like transporter family protein	*	plu1408	Phpb_02451	*	*	*	*	*
Major Facilitator Superfamily protein	*	plu1875	Phpb_02553	*	*	*	*	*
argininosuccinate lyase	*	plu1873	Phpb_02555	*	*	*	*	*
Acetyltransferase (GNAT) family protein	*	plu1872	Phpb_02556	*	*	*	*	*
2,3-dimethylmalate dehydratase small subunit	*	plu1870	Phpb_02558	*	*	*	*	*
2,3-dimethylmalate dehydratase large subunit	*	plu1869	Phpb_02559	*	*	*	*	*
2-isopropylmalate synthase	*	plu1867	Phpb_02560	*	*	*	*	*
Nitrilotriacetate monooxygenase component A	*	plu1866	Phpb_02561	*	*	*	*	*
Phosphonopyruvate hydrolase	*	plu1865	Phpb_02562	*	*	*	*	*
Outer membrane usher protein FimD precursor	*	plu3634	Phpb_00641	*	*	*	*	*
Lipid A export ATP-binding/permease protein MsbA	*	plu1214	Phpb_03165	*	*	*	*	*
putative ABC transporter ATP-binding protein	*	plu1215	Phpb_03166	*	*	*	*	*
Alanine-anticapsin ligase BacD	*	plu1218	Phpb_03169	*	*	*	*	*
Steroid C26-monooxygenase	*	plu1219	Phpb_03170	*	*	*	*	*
Outer membrane usher protein FimD precursor	*	plu0784	Phpb_03280	*	*	*	*	*
Single-stranded DNA-binding protein	*	plu1039	Phpb_03305	*	*	*	*	*
Plasmid stabilisation system protein	*	plu1932	Phpb_01063	*	*	*	*	*
6-pyruvoyl tetrahydropterin synthase	*	plu2794	Phpb_03385	*	*	*	*	*
GTP cyclohydrolase 1	*	plu2793	Phpb_03386	*	*	*	*	*
Hypothetical proteins
hypothetical protein	*	plu0641,plu0638	Phpb_04292	*	*	*	*	*
hypothetical protein	*	plu4330	Phpb_01734	*	*	*	*	*
hypothetical protein	*	plu3537	Phpb_00561	*	*	*	*	*
hypothetical protein	*	plu0781	Phpb_03277	*	*	*	*	*
hypothetical protein	*	plu3810,plu3132	Phpb_00394	*	*	*	*	*
hypothetical protein	*	plu1720	Phpb_02725	*	*	*	*	*
hypothetical protein	*	plu2845	Phpb_00083	*	*	*	*	*
hypothetical protein	*	plu0737	Phpb_01901	*	*	*	*	*
hypothetical protein	*	plu4815,plu4438,plu2954,plu2314,plu2047,plu1788	Phpb_02741	*	*	*	*	*
hypothetical protein	*	plu1697	Phpb_02786	*	*	*	*	*
hypothetical protein	*	plu3386	Phpb_00172	*	*	*	*	*
hypothetical protein	*	plu0031	Phpb_00237	*	*	*	*	*
hypothetical protein	*	plu4904	Phpb_00255	*	*	*	*	*
hypothetical protein	*	plu4903	Phpb_00257	*	*	*	*	*
hypothetical protein	*	plu4902	Phpb_00258	*	*	*	*	*
hypothetical protein	*	plu3914	Phpb_00395	*	*	*	*	*
hypothetical protein	*	plu3325	Phpb_00484	*	*	*	*	*
hypothetical protein	*	plu3537	Phpb_00561	*	*	*	*	*
hypothetical protein	*	plu3215	Phpb_00607	*	*	*	*	*
hypothetical protein	*	plu3630	Phpb_00638	*	*	*	*	*
hypothetical protein	*	plu3635	Phpb_00642	*	*	*	*	*
hypothetical protein	*	plu4614	Phpb_01142	*	*	*	*	*
hypothetical protein	*	plu0858	Phpb_01295	*	*	*	*	*
hypothetical protein	*	plu0857	Phpb_01296	*	*	*	*	*
hypothetical protein	*	plu0383	Phpb_01329	*	*	*	*	*
hypothetical protein	*	plu0384	Phpb_01331	*	*	*	*	*
hypothetical protein	*	plu1083	Phpb_01562	*	*	*	*	*
hypothetical protein	*	plu1353	Phpb_01582	*	*	*	*	*
hypothetical protein	*	plu0330	Phpb_01585	*	*	*	*	*
hypothetical protein	*	plu0349	Phpb_01587	*	*	*	*	*
hypothetical protein	*	plu0347	Phpb_01589	*	*	*	*	*
hypothetical protein	*	plu2514	Phpb_01652	*	*	*	*	*
hypothetical protein	*	plu4382	Phpb_01696	*	*	*	*	*
hypothetical protein	*	plu4324	Phpb_01739	*	*	*	*	*
hypothetical protein	*	plu0742	Phpb_01905	*	*	*	*	*
hypothetical protein	*	plu3204	Phpb_02145	*	*	*	*	*
hypothetical protein	*	plu1876	Phpb_02552	*	*	*	*	*
hypothetical protein	*	plu1874	Phpb_02554	*	*	*	*	*
hypothetical protein	*	plu1789	Phpb_02610	*	*	*	*	*
hypothetical protein	*	plu1719	Phpb_02726	*	*	*	*	*
hypothetical protein	*	plu1684	Phpb_02759	*	*	*	*	*
hypothetical protein	*	plu1670	Phpb_02772	*	*	*	*	*
hypothetical protein	*	plu2934	Phpb_03009	*	*	*	*	*
hypothetical protein	*	plu1032	Phpb_03296	*	*	*	*	*
hypothetical protein	*	plu2739	Phpb_03442	*	*	*	*	*
hypothetical protein	*	plu2571	Phpb_03621	*	*	*	*	*
hypothetical protein	*	plu4204	Phpb_03690	*	*	*	*	*
hypothetical protein	*	plu2126	Phpb_03873	*	*	*	*	*
hypothetical protein	*	plu2261	Phpb_04006	*	*	*	*	*
hypothetical protein	*	plu2276	Phpb_04023	*	*	*	*	*
hypothetical protein	*	plu2302	Phpb_04051	*	*	*	*	*
hypothetical protein	*	plu2326	Phpb_04073	*	*	*	*	*
hypothetical protein	*	plu2951	Phpb_04153	*	*	*	*	*
hypothetical protein	*	plu0344,plu0324	Phpb_04509	*	*	*	*	*
hypothetical protein	*	plu2084	Phpb_04628	*	*	*	*	*
Phage and insertion sequences
Phage tail fibre repeat protein	*	plu3329	Phpb_00488	*	*	*	*	*
Caudovirales tail fibre assembly protein	*	plu0032	Phpb_00236	*	*	*	*	*
Phage tail sheath protein	*	plu1706	Phpb_02749	*	*	*	*	*
Phage antitermination protein Q	*	plu4459	Phpb_01774	*	*	*	*	*
putative transposase	*	plu3811,plu1611	Phpb_01433	*	*	*	*	*
