# Supplementary material for: Genome comparisons provide insights into the role of secondary metabolites in the pathogenic phase of the Photorhabdus life cycle
Source: BMC Genomics. 2016 Aug 3;17:537. doi: 10.1186/s12864-016-2862-4 (PMC4971723; doi:10.1186/s12864-016-2862-4)
Supplement: Additional file 10: — P. temperata specific coding sequences. (XLSX 47 kb) [file 12864_2016_2862_MOESM10_ESM.xlsx]

## Sheet: Supplementary Table 5 - tempera
Predicted function	E_coli_K12	P_luminescens_TT01	P_luminescens_PB45.5	P_asymbiotica_DSM43949	P_asymbiotica_PB68.1	P_temperata_thracensis_DSM15199	P_temperata_M1021	P_temperata_NC19
Regulatory
CopG family transcriptional regulator	*	*	*	*	*	VY86_19640	B738_06434	PTE_01763
LuxR family transcriptional regulator	*	*	*	*	*	VY86_19585	B738_06479	PTE_00393,PTE_02714
DNA-binding protein	*	*	*	*	*	VY86_03985	B738_03275	PTE_03997
LuxR family transcriptional regulator	*	*	*	*	*	VY86_03450	B738_02365	PTE_01779
Cell wall and cell processes
7-cyano-7-deazaguanine reductase	*	*	*	*	*	VY86_12455	B738_10351	PTE_00386
phosphatidylinositol kinase	*	*	*	*	*	VY86_20330	B738_20858	PTE_02728
cobalamin biosynthesis protein CbiM	*	*	*	*	*	VY86_16750	B738_11790	PTE_03156
cobalamin biosynthesis protein CbiN	*	*	*	*	*	VY86_16755	B738_11795	PTE_03155
cobalamin biosynthesis protein CbiQ	*	*	*	*	*	VY86_16760	B738_11800	PTE_03154
ligand-gated channel	*	*	*	*	*	VY86_04730	B738_05141	PTE_01032
Hypothetical proteins
hypothetical protein	*	*	*	*	*	VY86_21525	B738_24297,B738_28332,B738_28512	PTE_02305
hypothetical protein	*	*	*	*	*	VY86_05185	B738_28647	PTE_04506
hypothetical protein	*	*	*	*	*	VY86_16155	B738_27947	PTE_03373
hypothetical protein	*	*	*	*	*	VY86_21710	B738_27017	PTE_01761
hypothetical protein	*	*	*	*	*	VY86_15920	B738_26622	PTE_03277
hypothetical protein	*	*	*	*	*	VY86_14595	B738_26277	PTE_02899
hypothetical protein	*	*	*	*	*	VY86_15975	B738_22520	PTE_03289
hypothetical protein	*	*	*	*	*	VY86_13015	B738_21460	PTE_01482
hypothetical protein	*	*	*	*	*	VY86_19320	B738_17869	PTE_02638
hypothetical protein	*	*	*	*	*	VY86_20565	B738_15801	PTE_02913
hypothetical protein	*	*	*	*	*	VY86_10590	B738_14577	PTE_01242
hypothetical protein	*	*	*	*	*	VY86_10785	B738_14772	PTE_01190
hypothetical protein	*	*	*	*	*	VY86_14070	B738_13438	PTE_00537
hypothetical protein	*	*	*	*	*	VY86_05170	B738_12779	PTE_01160
hypothetical protein	*	*	*	*	*	VY86_12995	B738_10516	PTE_01485
hypothetical protein	*	*	*	*	*	VY86_13635	B738_09506	PTE_00167
hypothetical protein	*	*	*	*	*	VY86_01985	B738_06799	PTE_00553
hypothetical protein	*	*	*	*	*	VY86_02885	B738_07409	PTE_00279
hypothetical protein	*	*	*	*	*	VY86_19510	B738_06639	PTE_02702
hypothetical protein	*	*	*	*	*	VY86_08735	B738_04311	PTE_02368
hypothetical protein	*	*	*	*	*	VY86_14600	B738_13109	PTE_03563
hypothetical protein	*	*	*	*	*	VY86_15880	B738_17327	PTE_01607
Phage and insertion sequences
transposase	*	*	*	*	*	VY86_15095,VY86_17060,VY86_11300,VY86_07935	B738_29421	PTE_03077
transposase	*	*	*	*	*	VY86_17255,VY86_14165,VY86_12610	B738_15396	PTE_04553
transposase	*	*	*	*	*	VY86_10730,VY86_08950	B738_06744	PTE_01550
